# Supplementary material for: Adverse Outcome Pathways Associated with the Ingestion of Titanium Dioxide Nanoparticles—A Systematic Review
Source: Nanomaterials (Basel). 2022 Sep 21;12(19):3275. doi: 10.3390/nano12193275 (PMC9565478; doi:10.3390/nano12193275)
Supplement: Supplementary file 1 [file nanomaterials-12-03275-s001.zip › Table S1-Data extraction information of 185 selected studies .xlsx]

## Sheet: Stage II
Paper ID						TiO2 NM characteristics															Organism/ Model studied						Exposure															Endpoints measured
Year	Author	Title	DOI	Url	Abstract	Crystalline phase (anatase/ rutile/ both/ other)?	Mixture (M); anatase (A); rutile (R); Not Specified (NS)	Size (nm)	Size ranges: <25nm; 25-50 nm; 50-100 nm; >100nm; Not specified (NS)	Hydrodynamic size (DLS size, nm)	Hydrodynamic size range: 25-50 nm; >100 nm; Not specified (NS)	Source (provider/ company)	Company/Source: Name; Other; Not Specified (NS)	Specific Surface Area (m2/g)	Specific Surface Area range (m2/g); <50; 50-100; >100; Not specified (NS)	Surface charge (mV)	Surface charge range (mV): Negative; Positive; Not specified (NS)	Dispersion method (time/potency of sonication, etc)	Dispersion method: Sonication; Other; Not specified (NS)	Other comments on characteristics (Text)	If in vivo study - Type of organism and organ/cells studied ?	If in vivo study - Type of organism and organ/cells: MICE/RAT; OTHER; NOT APLLICABLE/NOT SPECIFIED (NA/NS)	If in vitro study - Type of cells studied?	IN VITRO MODEL- CELL TYPE; OTHER; NOT APPLICABLE/NOT SPECIFIED (NA/NS)	If human study - Type of cells or organ?	Human study: Organ; Not applicable/Not specified (NA/NS)	Exposure route	Exposure route_revised	Exposure duration	In vitro (h) Max exposure period	In vivo (d) Max exposure period	Unit	Dose-range tested	Lowest dose	Highest dose	Unit	Methods of characterisation in exposure medium	DLS TEM Culture medium/vehicle of exposure	Other info	Characteristics in exposure medium (size, agglommeration)	Size (<100; 100 - 500; 500 - 1000; > 1000) (nm)	Cellular Uptake	Assay	Outcome in uptake assays	Translocation	Assay	Outcome in translocation assays	Oxidative Stress	Assay
2019	Jensen, Ditte Marie; Lohr, Mille; Sheykhzade, Majid; Lykkesfeldt, Jens; Wils, Regitze Solling; Loft, Steffen; Moller, Peter	Telomere length and genotoxicity in the lung of rats following intragastric exposure to food-grade titanium dioxide and vegetable carbon particles	10.1093/mutage/gez003		Vegetable carbon (E153) and titanium dioxide (E171) are widely used as black and white food colour additives. The aim of this study was to assess gastrointestinal tight junction and systemic genotoxic effects in rats following exposure to E153 and E171 for 10 weeks by oral gavage once a week. The expression of tight junction proteins was assessed in intestinal tissues. Levels of DNA strand breaks…	99.8% anatase and 0.2% rutile	A	135 ± 6, 305 ± 61 and 900 ± 247 nm	> 100 nm	270 ± 25 nm	> 100 nm	Bolsjehuset (Albertslund, Denmark; www.bolsjehuset.dk)	Other	n/a	NS	n/a	NS	dispersed in sterile water with 2% FBS and the stock suspension (1 mg/ml) was sonicated before it was diluted in Hank’s balanced saline solution and added to the cells	SONICATION	NS	lean Zucker female rats; liver, lung and spleen	MICE/RAT- LIVER/LUNG/SPLEEN	Human Caco-2	NA/NS	n/a	NA/NS	Oral gavage	Oral gavage	10 weeks	3h	70	d	low dose (50 mg/kg/week) or high-dose (500 mg/kg/week	50	500	mg/kg/week	n/a	NS		n/a	NS	No			No			Yes	H2DCFDA and comet
2017	Ruiz, Pedro A.; Moron, Belen; Becker, Helen M.; Lang, Silvia; Atrott, Kirstin; Spalinger, Marianne R.; Scharl, Michael; Wojtal, Kacper A.; Fischbeck-Terhalle, Anne; Frey-Wagner, Isabelle; Hausmann, Martin; Kraemer, Thomas; Rogler, Gerhard	Titanium dioxide nanoparticles exacerbate DSS-induced colitis: role of the NLRP3 inflammasome	10.1136/gutjnl-2015-310297		Objective Western lifestyle and diet are major environmental factors playing a role in the development of IBD. Titanium dioxide (TiO2) nanoparticles are widely used as food additives or in pharmaceutical formulations and are consumed by millions of people on a daily basis. We investigated the effects of TiO2 in the development of colitis and the role of the nucleotide-binding oligomerisation doma…	rutile	R	30–50 nm	25-50 nm	n/a	NS	IoLiTec	Other	n/a	NS	n/a	NS	Particles were resuspended in ultrapure water sonicated for 5 min	SONICATION	NS	female WT (C57BL/6J) and Nlrp3−/− mice between 12 and 14 weeks of age	MICE/RAT	HUMAN - Caco-2 Cells and HT29	NA/NS	n/a	NA/NS	Oral gavage	Oral gavage	7 days	30min	7	d	50 or 500 mg TiO2/day/kg bodyweight	50	500	mg/kg/day	n/a	NS		n/a	NS	Yes	epithelial permeability	Positive (+)	No			Yes	ROS production
2017	Proquin, Heloise; Rodriguez-Ibarra, Carolina; Moonen, Carolyn G. J.; Urrutia Ortega, Ismael M.; Briede, Jacob J.; de Kok, Theo M.; van Loveren, Henk; Chirino, Yolanda I.	Titanium dioxide food additive (E171) induces ROS formation and genotoxicity: contribution of micro and nano-sized fractions	10.1093/mutage/gew051		Since 1969, the European Union approves food-grade titanium dioxide (TiO2), also known as E171 colouring food additive. E171 is a mixture of micro-sized particles (MPs) and nano-sized particles (NPs). Previous studies have indicated adverse effects of oral exposure to E171, i. e. facilitation of colon tumour growth. This could potentially be partially mediated by the capacity to induce reactive o…	TiO2 NPs at 99,5% anatase	A	E171: 50–250; TiO2 NPs: 10–25	< 25 nm; 25-50 nm; 50-100 nm	316.8 ± 282.4 dynamic nm (d.nm) with E171 in McCoy + 10% FBS at 1mg/mL; 3085.00 ± 187.82 d.nm with E171 in HBSS at 1mg/mL; 316.8 ± 282.4 d.nm for E171 at 0,001mg/mL; 1385.83 ± 38.85 d.nm for MPs at 0,001mg/mL and 1942.17 ± 61.12 d.nm for NPs at 0,001mg/mL	> 100 nm	E171 from Sensient Technologies Company in Mexico; TiO2 MPs from PlasmaChem and TiO2 NPs from at Io-Li-Tec (Germany)	Sensient	TiO2 NPs at 50–150 m2/g	> 100	between −30 mV and +30 mV	NEGATIVE; POSITIVE	30 min of sonication (40 kHz)	SONICATION	NS	n/a	NA/NS	HUMAN - CACO-2 Cells ;HUMAN - HCT116 cells	HUMAN - CACO-2/GES-1	n/a	NA/NS	n/a	NA	n/a	24h		h	0, 5, 10, 50 and 100 μg/cm2 (0, 50, 100, 500 and 1000 μg/mL, respectively	NS	NS		n/a	NS		n/a	NS	No			No			Yes	ROS production
2012	Gerloff, Kirsten; Fenoglio, Ivana; Carella, Emanuele; Kolling, Julia; Albrecht, Catrin; Boots, Agnes W.; Foerster, Irmgard; Schins, Roel P. F.	Distinctive Toxicity of TiO2 Rutile/Anatase Mixed Phase Nanoparticles on Caco-2 Cells	10.1021/tx200334k		Titanium dioxide has a long-standing use as a food additive. Micrometric powders are, e.g., applied as whiteners in confectionary or dairy products. Possible hazards of ingested nanometric TiO2 particles for humans and the potential influence of varying specific surface area (SSA) are currently under discussion. Five TiO2-samples were analyzed for purity, crystallinity, primary particle size, SSA…	Pyrogenic nanometric anatase/rutile powder (TUFA/RI); nanometric anatase/rutile powder (TUFA/RII); nanometric anatase powder (JRC12) (TUFAI); nanometric anatase powder (TUFAII); fine (micrometric) anatase powder (TFA)	A; R; M	TFA - 215 ± 2nm; TUFA/RI - 25.20 ± 0.20nm; TUFA/RII - 21.90 ± 0.30nm; TUFAI - 6.7 ± 1.3nm; TUFAII - 3.94 ± 0.05nm	< 25 nm; 25-50 nm; >100 nm	TFA - 374.0 ± 5.5nm; TUFA/RI - 214.5 ± 2.6nm; TUFA/RII - 327.5 ± 27.6nm; TUFAI - 455.2 ± 74.4nm; TUFAII - 291.1 ± 56.6nm	> 100 nm	Degussa-Evonik (Germany); Sigma (Germany; Japan Catalysis Society; Sachtleben (Germany); Aldrich (Germany)	Evonik	TFA - 10m2/g; TUFA/RI - 52.6 ± 0.1m2/g; TUFA/RII - 52.8 ± 0.4m2/g; TUFAI - 282.3 ± 1.9m2/g; TUFAII - 342.4 ± 1.3m2/g	< 50; 50-100	TFA - −48.9mV; TUFA/RI - −21.5mV; TUFA/RII - −23.5mV; TUFAI - −36.5mV; TUFAII - −38.3mV	NEGATIVE	sonicated for 2 min with a probe sonicator (100 W, 60 kHz)	SONICATION	NS	n/a	NA/NS	Human colon adenocarcinoma cell line Caco-2	HUMAN - CACO-2	n/a	NA/NS	n/a	NA	n/a	24h		h	20, 80 μg/cm2	NS	NS		n/a	NS		n/a	NS	No			No			Yes	intracellular GSH content
2019	El-Din, Eman Ahmed Alaa; Mostafa, Heba El-Sayed; Samak, Mai A.; Mohamed, Eman M.; El-Shafei, Dalia Abdallah	Could curcumin ameliorate titanium dioxide nanoparticles effect on the heart? A histopathological, immunohistochemical, and genotoxic study	10.1007/s11356-019-05433-2		The evaluation of the toxicological effects of titanium dioxide nanoparticles (TiO(2)NPs) is increasingly important due to their growing occupational and industrial use. Curcumin is a yellow curry spice with a long history of use in herbal medicine and has numerous protective potentials such as antioxidant, antimicrobial, anti-inflammatory, and antiapoptotic effects. Accordingly, we tested the hy…	Mixture of rutile and anatase	M	< 100 nm	< 25 nm; 25-50 nm; 50-100 nm	n/a	NS	Sigma-Aldrich chemicals Co	Sigma	n/a	NS	n/a	NS	TiO2NPs were suspended in 0.9% saline, and that suspension was sonicated for 10 min before the treatment	SONICATION	NS	Adult male albino rats	MICE/RAT	n/a	NA/NS	n/a	NA/NS	Oral gavage	Oral gavage	90 days		90	d	1200 mg/kg b.w./day (1/10 LD50)	1200	1200	mg/kg/day	n/a	NS		n/a	NS	No			No			No
2015	Song, Zheng-Mei; Chen, Ni; Liu, Jia-Hui; Tang, Huan; Deng, Xiaoyong; Xi, Wen-Song; Han, Kai; Cao, Aoneng; Liu, Yuanfang; Wang, Haifang	Biological effect of food additive titanium dioxide nanoparticles on intestine: an in vitro study	10.1002/jat.3171		Titanium dioxide nanoparticles (TiO2 NPs) are widely found in food-related consumer products. Understanding the effect of TiO2 NPs on the intestinal barrier and absorption is essential and vital for the safety assessment of orally administrated TiO2 NPs. In this study, the cytotoxicity and translocation of two native TiO2 NPs, and these two TiO2 NPs pretreated with the digestion simulation fluid …	T1 and T2 TiO2 NPs are of anatase phase	A	T1 - 99± 30 nm and T2 - 26± 12 nm	25-50; 50-100 nm; >100 nm	T1 - 233nm, T1G - 2124nm, T2 - 497nm, T2G - 2762nm in water; T1 - 719nm, T1G - 2694nm, T2 - 1785nm, T2G - 2915nm in medium	> 100 nm	T1 from Jianghu Industrial Co. (Shanghai, China) and T2 from Aladdin Industrial Co. (Shanghai, China).	Aladdin	n/a	NS	T1 - –47.2± 1.5mV and T2 - –32.2± 1.0mV in water; T1 - –7.3 ± 0.3mV and T2 - –8.4 ± 0.7mV in medium	NEGATIVE	NS	NS	NS	n/a	NA/NS	Undifferentiated Caco-2 cells, differentiated Caco-2 cells and Caco-2 monolayer	HUMAN - CACO-2	n/a	NA/NS	n/a	NA	n/a	24h		h	50 and 200 μg/m	NS	NS	NS	n/a	NS		n/a	NS	Yes	flow cytometric light scatter analysis and TEM	Positive (+)	Yes		No effect	Yes	ROS production
2019	Pedata, Paola; Ricci, Giulia; Malorni, Livia; Venezia, Antonella; Cammarota, Marcella; Volpe, Maria Grazia; Iannaccone, Nunzia; Guida, Vincenzo; Schiraldi, Chiara; Romano, Marco; Iacomino, Giuseppe	In vitro intestinal epithelium responses to titanium dioxide nanoparticles	10.1016/j.foodres.2018.10.041		Titanium dioxide (TiO2) is enclosed in many consumer products including pharmaceuticals, cosmetics, and foods. TiO2 (E171) is daily ingested as mixed nano- and submicron-sized particles since it is approved as a white colorant in Europe in a wide variety of food products, Noteworthy, the relevant risk assessment has never been satisfactorily concluded and growing alarms for human hazards deriving…	-	NS	21 nm	< 25 nm	n/a	NS	Sigma-Aldrich	Sigma	35–65 m2/g	< 50; 50-100	n/a	NS	sonicated for 1 min immediately prior to making dilutions into DMEM	SONICATION	NS	n/a	NA/NS	Caco-2 cell line in a polarized epithelial monolayer	HUMAN - CACO-2	n/a	NA/NS	n/a	NA	n/a	NS		h	n/a	NS	NS	NS	n/a	NS		n/a	NS	Yes	TEM and ESI/EELS analysis	Positive (+)	No			No
2017	Guo, Zhongyuan; Martucci, Nicole J.; Moreno-Olivas, Fabiola; Tako, Elad; Mahler, Gretchen J.	Titanium dioxide nanoparticle ingestion alters nutrient absorption in an in vitro model of the small intestine	10.1016/j.impact.2017.01.002		Ingestion of titanium dioxide (TiO2) nanoparticles from products such as agricultural chemicals, processed food, and nutritional supplements is nearly unavoidable. The gastrointestinal tract serves as a critical interface between the body and the external environment, and is the site of essential nutrient absorption. The goal of this study was to examine the effects of ingesting the 30 nm TiO2 na…	-	NS	20 to 40 nm	< 25 nm; 25-50 nm	300–2000 nm	> 100 nm	US Research Nanomaterials, Inc. (Houston, TX)	Other	n/a	NS	−18 mV to 5 mV in 18 MΩ water-58Fe(II)/67Zn(II)- ascorbate; −10 mV to −13 mV in in MEM-58Fe(II)/67Zn(II)- ascorbate	NEGATIVE	NS	NS	NS	n/a	NA/NS	Caco-2 cell line and HT29-MTX monolayer	HUMAN - CACO-2/HT29-MTX	n/a	NA/NS	n/a	NA	n/a	24h		h	n/a	NS	NS	NS	n/a	NS		n/a	NS	No			No			No	ROS production
2019	Brown, D.M.; Danielsen, P.H.; Derr, R.; Moelijker, N.; Fowler, P.; Stone, V.; Hendriks, G.; M√∏ller, P.; Kermanizadeh, A.	The mechanism-based toxicity screening of particles with use in the food and nutrition sector via the ToxTracker reporter system	10.1016/j.tiv.2019.104594	https://www.scopus.com/inward/record.uri?eid=2-s2.0-85068497116&doi=10.1016%2fj.tiv.2019.104594&partnerID=40&md5=1af06308ff6687ae8e57b93f9837ffc8	The rapid expansion of the incorporation of nano-sized materials in consumer products overlaps with the necessity for high-throughput reliable screening tools for the identification of the potential hazardous properties of the nanomaterials. The ToxTracker assay (mechanism-based reporter assay based on embryonic stem cells that uses GFP-tagged biomarkers for detection of DNA damage, oxidative str…	99.8% anatase and 0.2% rutile	M	n/a	NS	392 to 503 in mES complete medium; 408 to 488.5 in Caco-2 complete medium; 395 to 509 in HepG2 complete medium	> 100 nm	www.bolsjehuset.dk	Other	n/a	NS	−5.89 to −8.99 in mES complete medium; −9.07 to −9.88 in Caco-2 complete medium; −6.44 to −9.34 in HepG2 complete medium	NEGATIVE	The particles were dispersed in cell culture grade water supplemented with 2% fetal calf serum (FCS) (Gibco, UK) (stock solution of 1 mg/ml). The stock solution was sonicated for a period of 10 min without pause. This sonicated stock suspension was diluted in the appropriate complete cell culture medium for all subsequent experiments.	SONICATION	NS	n/a	NA/NS	ToxTracker reporter cells cultured in the presence or absence of primary mouse embryonic fibroblasts; human hepatoblastoma HepG2 cell; human Caco-2 cell line	HUMAN - CACO-2/HEPG2	n/a	NA/NS	n/a	NA	n/a	NS		h	n/a	NS	NS	NS	n/a	NS		n/a	NS	No			No			Yes	Glutathione depletion assay; Dose-dependent increase (+) in Hepg2 (highest dose); no effect in Caco-2; Toxtracker no effect;
2019	Heidari, Zahra; Mohammadipour, Abbas; Haeri, Parisa; Ebrahimzadeh-bideskan, Alireza	The effect of titanium dioxide nanoparticles on mice midbrain substantia nigra	10.22038/ijbms.2019.33611.8018		Objective(s): Widely used Titanium dioxide nanoparticles (TiO2) enter into the body and cause various organ damages. Therefore, we aimed to study the effect of TiO2 on the substantia nigra of midbrain. Materials and Methods: 40 male BALB/c mice were randomly divided into five groups: three groups received TiO2 at doses of 10, 25, and 50 mg/kg, the fourth group received normal saline for 45 days b…	anatase crystalline phase	A	10 nm	< 25 nm	n/a	NS	Nano Lima Corporation (Iran)	Other	>150 m2/g	> 100	n/a	NS	NS	NS	purity of 99%	male Balb/c mice aged 7–8 weeks and weighing 25–30 gr	MICE/RAT	n/a	NA/NS	n/a	NA/NS	Oral gavage	Oral gavage	45 days		45	d	10, 25, and 50 mg/kg	10	50	mg/kg	n/a	NS		n/a	NS	No			No			No
2018	Sharafutdinova, L A; Fedorova, A M; Bashkatov, S A; Sinel'nikov, K N; Valiullin, V V	Structural and Functional Analysis of the Spermatogenic Epithelium in Rats Exposed to Titanium Dioxide Nanoparticles	10.1007/s10517-018-4332-2	https://pubmed.ncbi.nlm.nih.gov/30488201	We studied immunohistochemical and morphometric characteristics of the spermatogenic epithelium in rats against the background of peroral administration of nanoparticles containing titanium dioxide. Substantial degenerative changes in the spermatogenic epithelium were revealed: thinning, disorganization of layers, and detachment of sperm cells from the basement membrane. Immunohistochemical analy…	rutile form	R	40-60 nm	25-50 nm; 50-100 nm	n/a	NS	n/a	NS	n/a	NS	n/a	NS	TiO2 powder dissolved in distilled water by ultrasound	SONICATION	NS	Wistar rats weighing 170-210 g	MICE/RAT		NA/NS	n/a	NA/NS	Peroral administration	Peroral exposure	14 and 30 days		30	d	50 mg/kg body weight	50	50	mg/kg	n/a	NS		n/a	NS	No			No			No
2015	MacNicoll, Alan; Kelly, Mick; Aksoy, Hatice; Kramer, Evelien; Bouwmeester, Hans; Chaudhry, Qasim	A study of the uptake and biodistribution of nano-titanium dioxide using in vitro and in vivo models of oral intake	10.1007/s11051-015-2862-3		Certain food additives may contain a sizeable fraction of particles in the nanoscale. However, little is known about the fate, behaviour and toxicological effects of orally-ingested nanoparticles. This study investigated the uptake and biodistribution of nano-and larger-sized titanium dioxide (TiO2) using an in vitro model of gut epithelium and in vivo in rat. The results of the in vivo study sho…	Both rutile and anatase forms	M	In vitro studies from 15nm to 5μm; in vivo studies from 40nm to 5μm	< 25nm; 25-50 nm	n/a	NS	Sigma; Nanocomposix; NanoAmor	Sigma	n/a	NS	n/a	NS	Different methods were attempted to obtain stabilised dispersions. These included applying high-powered sonication (Ultrasonic Processor at level 5, Heat Systems), and/or coating with ovalbumin.	SONICATION	NS	Sprague–Dawley 8-week-old male rats; blood, urine and GI tract	MICE/RAT - BLOOD/URINE/GIT	Co-culture of human enterocytes (Caco-2 cells) and M-cells	HUMAN - CACO-2/RAJIB	n/a	NA/NS	Oral gavage	Oral gavage	96h		4	d	5 mg/kg body weight	5	5	mg/kg	Alkali digestion was used to solubilise TiO2 particles in aliquots of blood and urine. Acid digestion was used for tissue samples, 0.2 g aliquots of which after grinding the whole sample were transferred to polypropylene autosampler tubes and digested in sulphuric acid (0.5 ml, *18 M) using a hot block set at 100 C for 60 min. Faecal samples were digested in 5 ml nitric acid using quartz high pre…	ICP-MS		n/a	NS	Yes	sp-ICP-MS	No effect	Yes		No effect	No
2020	Canli, Esin G√ºlnaz; Gumus, Cebrail; Canli, Mustafa; Ila, Hasan Basri	The effects of titanium nanoparticles on enzymatic and non-enzymatic biomarkers in female Wistar rats	10.1080/01480545.2019.1708925	https://pubmed.ncbi.nlm.nih.gov/31899975	Titanium dioxide (TiO(2)) nanoparticles (NPs) are widely used in industry, pharmacy, medicine, and food sectors. Therefore, this study deals with the effects of TiO(2) NPs in female rats following oral administration in differing doses for 14¬†days (0, 0.5, 5, and 50‚Äâmg/kg b.w./d). The response of enzymatic biomarkers (Na,K-ATPase, Mg-ATPase, and AChE) was measured in the brain, kidney, and sma…	Anatase form, polycrystal structure, and tetragonal phase	A	21 nm	< 25 nm	n/a	NS	Sigma-Aldrich (Darmstadt, Germany)	Sigma	30 m2/g	< 50	n/a	NS	Sonication for 20 min	SONICATION	>99% purity, and 4.26 g/cm3 density	Female albino rats; liver, kidney, brain, and intestine	MICE/RAT - LIVER/KIDNEY/BRAIN/GIT	n/a	NA/NS	n/a	NA/NS	Oral gavage	Oral gavage	14 days		14	d	0, 0.5, 5, and 50mg/kg b.w./d	0.5	50	mg/kg/day	n/a	NS		n/a	NS	No			Yes		Positive	Yes	GSH/GSSG ratio
2019	Manivannan, J.; Banerjee, R.; Mukherjee, A.	Genotoxicity analysis of rutile titanium dioxide nanoparticles in mice after 28 days of repeated oral administration	10.1007/s13237-019-00277-0	https://www.scopus.com/inward/record.uri?eid=2-s2.0-85067949573&doi=10.1007%2fs13237-019-00277-0&partnerID=40&md5=ce3031d52ea31a01254ad79bacd415d7	Titanium dioxide (TiO2) or titania has demonstrated excellent potential for commercial use in various arenas, such as in the paint, in pharmaceuticals and food industry. However information on the genotoxic potential of rutile form of TiO2-NP after repeated (28 days) low dose oral exposure in major organs of the reticuloendothelial system (liver, spleen, bone marrow, lymph nodes) is not known. In…	rutile form, spherical and rod-shaped particles	R	≤ 25 nm	< 25 nm	TiO2- NP at concentration; 20, 40, and 80 ppm are in the size range of 335.4, 384.2, and 324.6 nm respectively.	> 100 nm	Sigma-Aldrich Co. USA	Sigma	n/a	NS	Zeta potential values for 20, 40, and 80 ppm were − 8.94, − 14.7, and − 17.3 mV, respectively.	NEGATIVE	NS	NS	molecular weight of 79.87	Swiss albino male mice; liver, bone marrow, spleen, thymus and lymph node cells	MICE/RAT - LIVER/BONE MARROW/SPLEEN/THYMUS/LIMPH NODES	n/a	NA/NS	n/a	NA/NS	Oral gavage	Oral gavage	28 days		28	d	0.2, 0.4, and 0.8 mg/kg body weight	0.2	0.8	mg/kg	n/a	NS		n/a	NS	No			No		n/a	No
2019	Chen, Zhangjian; Zhou, Di; Zhou, Shupei; Jia, Guang	Gender difference in hepatic toxicity of titanium dioxide nanoparticles after subchronic oral exposure in Sprague-Dawley rats	10.1002/jat.3769		Existing literature pointed out that the liver may be the target organ of toxicity induced by titanium dioxide nanoparticles (TiO2 NPs) via oral exposure. Gender differences in health effects widely exist and relevant toxicological research is important for safety assessment. To explore the gender susceptibility of TiO2 NP-induced hepatic toxicity and the underlying mechanism, we examined female …	Anatase crystals	A	24 ± 5 nm	< 25 nm	n/a	NS	Shanghai Aladdin Reagent Co. Ltd (Shanghai, China)	Aladdin	63.95 m2/g	50-100	n/a	NS	Dispersed in ultrapure H2O and vibrated ultrasonically for 15 minutes. The particle dispersion solution was stirred on a vortex agitator before every use.	SONICATION	purity of 99.90%	Female and male Sprague‐Dawley rats; Liver	MICE/RAT - LIVER	n/a	NA/NS	n/a	NA/NS	Oral gavage	Oral gavage	90 days		90	d	0, 2, 10 and 50 mg/kg BW	2	50	mg/kg	n/a	NS		n/a	NS	No			No		n/a	Yes	GSH, GSSG, and MDA, and the activity of GSH‐Px and SOD
2019	Mohammed, Eman T.; Safwat, Ghada M.	Grape Seed Proanthocyanidin Extract Mitigates Titanium Dioxide Nanoparticle (TiO2-NPs)-Induced Hepatotoxicity Through TLR-4/NF-kappa B Signaling Pathway	10.1007/s12011-019-01955-5		With the progress of nanotechnology, the adverse effects of nanoscale materials are receiving much attention. Inhibition of toll-like receptor 4 (TLR-4)/nuclear factor kappa B (NF-kappa B) signaling is a hallmark for downregulating the expression of many inflammatory genes implicated in oxidative stress. Therefore, the present study aimed to demonstrate the influence of grape seed proanthocyanidi…	-	NS	63–142 nm	50-100 nm; >100nm	338.7 nm	> 100 nm	Sigma-Aldrich, Egypt	Sigma	n/a	NS	− 19.1 mV	NEGATIVE	Suspended in distilled water at a concentration of 50 mg/ml/100 g rat, then dispersed by ultrasonic vibration for 15 min	SONICATION	Poly dispersion index of 0.246	Adult male Albino rats (Rattus norvegicus) weighing 150–180 g; Liver	MICE/RAT - LIVER	n/a	NA/NS	n/a	NA/NS	Orally by gastric tube	Oral gavage	30 days		30	d	500 mg/kg bw	500	500	mg/kg	n/a	NS		n/a	NS	No			No		n/a	Yes	lipid peroxidation in liver
2019	Rodriguez-Escamilla, Juan Carlos; Medina-Reyes, Estefany, I; Rodriguez-lbarra, Carolina; Deciga-Alcaraz, Alejandro; Flores-Flores, Jose O.; Ganem-Rondero, Adriana; Rodriguez-Sosa, Miriam; Terrazas, Luis, I; Delgado-Buenrostro, Norma L.; Chirino, Yolanda, I	Food-grade titanium dioxide (E171) by solid or liquid matrix administration induces inflammation, germ cells sloughing in seminiferous tubules and blood-testis barrier disruption in mice	10.1002/jat.3842		Food-grade titanium dioxide labeled as E171 has been approved for human consumption by the Food and Drug Administration (USA) and by the European Union for five decades. However, titanium dioxide has been classified as a possible carcinogen for humans by the International Agency of Research in Cancer raising concerns of its oral intake and the translocation to bloodstream, which could disturb bar…	anatase phase	A	n/a	NS	297 ± 29nm in simulated gastric fluid; 373 ± 91 in simulated intestinal fluid	> 100 nm	SENSIENT (cat. no. 09972)	Sensient	n/a	NS	−1.4 ± 0.1mV in simulated gastric fluid; −16.2 ± 0.8mV in simulated intestinal fluid	NEGATIVE	Dispersed in 1 mL of SGF and SIF and sonicated at 60 Hz for 30 minutes	SONICATION	NS	5 and 8‐week‐old BALB/c mice; blood-testis barrier	MICE/RAT - BLOOD	n/a	NA/NS	n/a	NA/NS	Intragastric gavage	Oral gavage	10 weeks		70	d	0.1%, 0.5% and 1% in pellets; 5 mg/kg body weight in liquid suspension	5	5	mg/kg	n/a	NS		n/a	NS	No			No		n/a	No
2013	Attia, H.F.; Soliman, M.M.; Abdel-Rahman, G.H.; Nassan, M.A.; Ismail, S.A.; Farouk, M.; Solcan, C.	Hepatoprotective effect of N-acetylcystiene on the toxic hazards of titanium dioxide nanoparticles	10.3844/ajptsp.2013.141.147	https://www.scopus.com/inward/record.uri?eid=2-s2.0-84891397447&doi=10.3844%2fajptsp.2013.141.147&partnerID=40&md5=4c1f5d0129ad17b64317d52b3d62d3fc	The present study was directed to evaluate the toxic effects of orally administered titanium dioxide naonparticles (TiO2) on liver of male albino rats and to evaluate the ameliorative effects of N-acetylcysteine (NAC). Forty adult male albino rats were divided into 4 groups; control group, NAC group, TiO2 group and TiO2/ NAC group. Rats were administered either TiO2 (1200 mg kg-1 BW) or NAC (100 …	Anatase	A	25-70 nm	25-50 nm; 50-100 nm		NS	Sigma Aldrich chemical Co.	Sigma	20-25 m/g	< 50		NS	NS	NS	NS	Adult male albino rats; Blood; Liver	MICE/RAT - BLOOD/LIVER		NA/NS		NA/NS	Gavage	Oral gavage	9 months		274	d	1200 mg kg−1 BW	1200	1200	mg/kg		NS			NS	No			No			No
2019	Proquin, Heloise; Jonkhout, Marloes C. M.; Jetten, Marlon J.; van Loveren, Henk; de Kok, Theo M.; Briede, Jacob J.	Transcriptome changes in undifferentiated Caco-2 cells exposed to food-grade titanium dioxide (E171): contribution of the nano- and micro- sized particles	10.1038/s41598-019-54675-0		The food additive titanium dioxide (TiO2), or E171, is a white food colorant. Recent studies showed after E171 ingestion a significantly increased number of colorectal tumours in a colorectal cancer mouse model as well as inflammatory responses and dysregulation of the immune system in the intestine of rats. In the mouse colon, E171 induced gene expression changes related to oxidative stress, imp…	Anatase	A	10 to 30 nm	< 25 nm; 25-50 nm		NS		NS	50 to 150 m2/g	< 50; 50-100		NS	30 min of sonication (40 kHz)	SONICATION	NS	NA	NA/NS	HUMAN - CACO-2	NA/NS		NA/NS	Oral gavage	Oral gavage	Once daily for 9 months	24h	274	d	0.01 mg/ml ( 1.43 μg/cm2	NS	NS	mg/kg		NS			NS	No			No			No	oxidative stress and antioxidant activities
2019	Lee, Jinsoo; Jeong, Ji-Seong; Kim, Sang Yun; Park, Min-Kyu; Choi, Sung-Deuk; Kim, Un-Jung; Park, Kwangsik; Jeong, Eun Ju; Nam, Sang-Yoon; Yu, Wook-Joon	Titanium dioxide nanoparticles oral exposure to pregnant rats and its distribution	10.1186/s12989-019-0313-5		Background: Titanium dioxide (TiO2) nanoparticles are among the most manufactured nanomaterials in the industry, and are used in food products, toothpastes, cosmetics and paints. Pregnant women as well as their conceptuses may be exposed to TiO2 nanoparticles; however, the potential effects of these nanoparticles during pregnancy are controversial, and their internal distribution has not been inv…	Anatase/rutile (80:20)	M	21 nm (TEM 17.8 ± 5.46 nm)	< 25 nm	341.5 nm	> 100 nm	Evonik Industries (Germany)	Evonik		NS	35.16 mV	POSITIVE	NS	NS	NS	Specific pathogen free (SPF) female Sprague-Dawley rats (females); Fetal tissue collection: liver; brain; blood; placenta; Maternal tissue collection: liver; brain; blood.	MICE/RAT- LIVER/BRAIN/BLOOD/PLACENTA		NA/NS		NA/NS	Oral gavage	Oral gavage	14 days (from 6 to 19 GDs)		14	d	100, 300 and 1000 mg/kg	100	1000	mg/kg	Inductively coupled plasma mass spectrometry (ICP–MS)	ICP-MS			NS	No			No			No
2017	Canli, Esin Gulnaz; Canli, Mustafa	Effects of aluminum, copper, and titanium nanoparticles on some blood parameters in Wistar rats	10.3906/zoo-1512-23		In this study, Al2O3, CuO, and TiO2 nanoparticles (NPs) were individually administered to 60 mature female rats via oral gavage (0, 0.5, 5, and 50 mg/kg b. w. per day) for 14 days and then responses of ATPases in the erythrocytes, total oxidant status (TOS), total antioxidant status (TAS), and liver enzyme (alkaline phosphatase, ALP; alanine transaminase, ALT; aspartate transaminase, AST) levels …	-	NS	21 nm	< 25 nm		NS		NS		NS		NS	sonicated for 20 min on ice prior	SONICATION	NS	Mature female Wistar albino Sprague Dawley rats; ATPases in the erythrocytes, total oxidant status (TOS), total antioxidant status (TAS), and liver enzyme	MICE/RAT - BLOOD		NA/NS		NA/NS	Oral gavage	Oral gavage	14 days		14	d	0, 0.5, 5, and 50 mg/kg b.w. per day	0.5	50	mg/kg/day		NS			NS	No			No			Yes	total oxidant status (TOS)
2016	Tada-Oikawa, Saeko; Ichihara, Gaku; Fukatsu, Hitomi; Shimanuki, Yuka; Tanaka, Natsuki; Watanabe, Eri; Suzuki, Yuka; Murakami, Masahiko; Izuoka, Kiyora; Chang, Jie; Wu, Wenting; Yamada, Yoshiji; Ichihara, Sahoko	Titanium Dioxide Particle Type and Concentration Influence the Inflammatory Response in Caco-2 Cells	10.3390/ijms17040576		Titanium dioxide (TiO2) nanoparticles are widely used in cosmetics, sunscreens, biomedicine, and food products. When used as a food additive, TiO2 nanoparticles are used in significant amounts as white food-coloring agents. However, the effects of TiO2 nanoparticles on the gastrointestinal tract remain unclear. The present study was designed to determine the effects of five TiO2 particles of diff…	Anatase, Rutile and both	M	A50 (anatase, primary diameter: 50 nm); A100 (anatase, primary diameter: 100 nm); R50 (rutile, primary diameter: 50 nm); R250 (rutile, primary diameter: 250 nm), and P25 (80% anatases/20% rutile, primary diameter: 21 nm)	< 25 nm; 50-100 nm; > 100nm		NS	mkNano; Degussa	Evonik		NS		NS	in serum-containing culture media and dispersed using a sonicator (model 450, Branson Sonifier, Danbury, CT, USA) set at 80% pulsed mode, 100 W, and 15 min	SONICATION	NS		NA/NS	Human monocytic leukemia cells cell line THP-1; human colon colorectal adenocarcinoma cell line Caco-2	HUMAN - CACO-2/THP-1		NA/NS		NA	24 or 72 h	72		h	1 to 50 µg/mL	1	50	µg/mL		NS		A50, RPMI1640 205.30 ± 4.88 nm; PdI 0.319 ± 0.007; -11.86 ± 1.47; A50, DMEM 227.78 ± 3.62 nm; PdI 0.291 ± 0.012; -11.31 ± 0.39; A50, RPMI1640 205.30 ± 4.88 nm; PdI 0.319 ± 0.007; -11.86 ± 1.47; A50, DMEM 227.78 ± 3.62 nm; PdI 0.291 ± 0.012; -11.31 ± 0.39; A100, RPMI1640 262.10 ± 4.66 nm; PdI 0.191 ± 0.026; -11.66 ± 1.38; A100, DMEM 253.40 ± 4.11 nm; PdI 0.171 ± 0.010; -11.84 ± 1.74; R50, RPMI1640…	100 - 500	No			No			Yes	ROS production
2009	Gerloff, Kirsten; Albrecht, Catrin; Boots, Agnes W.; Foerster, Irmgard; Schins, Roel P. F.	Cytotoxicity and oxidative DNA damage by nanoparticles in human intestinal Caco-2 cells	10.3109/17435390903276933		The use of engineered nanoparticles in the food sector is anticipated to increase dramatically, whereas their potential hazards for the gastrointestinal tract are still largely unknown. We investigated the cytotoxic and DNA-damaging effects of several types of nanoparticles and fine particles relevant as food additives (TiO2 and SiO2) or for food packaging (ZnO and MgO) as well as carbon black on…	TiOs-F: TiO2 fine (pure anatase); TiO2: TiO2 ultrafine (80% anatase, 20% rutile); TiO2-HSA: TiO2 (anatase modified)	M	TiO2-F: 40-300; Ti=2: 50; TiO2-HSA: <10	< 25 nm; 25-50 nm; 50-100 nm; >100 nm		NS	TiO2-F: Aldrich; Ti=2: Degussa; TiO2-HSA: Sigma	Sigma	TiO2-F: 10; Ti=2: 50; TiO2-HSA: >300	> 100		NS	All particles were suspended in starvation culture medium. The suspension was sonicated (Sonorex TK52 water-bath; 60 Watt, 35 kHz) for 7 min	SONICATION	NS		NA/NS	Caco-2 Cells	HUMAN - CACO-2		NA/NS		NA	4 and 24 h	24		h	20 and 80 mg/cm2 particles	20	80	mg/cm2		NS			NS	No			No			No
2010	Koeneman, Brian A.; Zhang, Yang; Westerhoff, Paul; Chen, Yongsheng; Crittenden, John C.; Capco, David G.	Toxicity and cellular responses of intestinal cells exposed to titanium dioxide	10.1007/s10565-009-9132-z		The increasing use of nanomaterials in healthcare and industrial products heightens the possibility of their ingestion by humans, other mammals, and fish. While toxicity of many nanomaterials has recently been studied, reports of non-lethal effects of nanomaterials remain ill-defined. This study investigates possible pathways by which nanoparticles, titanium dioxide (TiO(2)), could cross the epit…	Mixture of rutile and anatase	M	<40	< 25 nm; 25-50 nm	220±20	> 100 nm		NS	20-40	< 50		NS	Stock TiO2 was stored in the dark and sonicated (Fisher Scientific; Model 100) for 30 s immediately prior to making specified concentration in DMEM. DMEM-containing TiO2 was sonicated for 30 s immediately prior to applying TiO2 to the cells.	SONICATION	TiO2 was applied to the cells in low-level lighting and the cells were incubated in the dark for specified time.		NA/NS	Caco-2 Cells	HUMAN - CACO-2		NA/NS		NA	0 h until 10 days - Acute treatment the TiO2 was only applied once at the inception of the experiment - Chronic treatment TiO2 was applied with fresh culture medium every 12–24 h depending on the experiment	240		h	1 µg/L to 1000 µg/L	1	1000	µg/L		NS			NS	Yes	TEER, γ-catenin	No effect	yes	HeNe laser and imaged with a filter	Positive	No
2020	Hashem, M.M.; Abo-EL-Sooud, K.; Abd-Elhakim, Y.M.; Badr, Y.A.-H.; El-Metwally, A.E.; Bahy-El-Dien, A.	The long-term oral exposure to titanium dioxide impaired immune functions and triggered cytotoxic and genotoxic impacts in rats	10.1016/j.jtemb.2020.126473	https://www.scopus.com/inward/record.uri?eid=2-s2.0-85080122501&doi=10.1016%2fj.jtemb.2020.126473&partnerID=40&md5=bcd6c2010ce3991ec1990db7eb89be12	Background: Titanium dioxide "TiO2, E171‚Ä≥ is a widely used food additive that exists in various everyday food products all over the world together with vast applications in cosmetics and industry. However, many toxicological aspects particularly following oral exposure still unclear. Methods: Hence, this study was planned to examine the effect of oral exposure of male Wistar rats to two doses o…	-	NS		NS		NS	Sigma	Sigma		NS		NS	NS	NS	NS	Male Wistar rats; blood components, immunity, cytotoxic, and genotoxic indicators; blood and spleen	MICE/RAT - BLOOD/SPLEEN		NA/NS		NA/NS	Oral gavage	Oral gavage	90 consecutive days		90	d	20 or 40 mg/kg b.wt. once daily	20	40	mg/kg/day		NS			NS	No			No			No
2014	Geraets, Liesbeth; Oomen, Agnes G.; Krystek, Petra; Jacobsen, Nicklas R.; Wallin, Hakan; Laurentie, Michel; Verharen, Henny W.; Brandon, Esther F. A.; de Jong, Wim H.	Tissue distribution and elimination after oral and intravenous administration of different titanium dioxide nanoparticles in rats	10.1186/1743-8977-11-30		Objective: The aim of this study was to obtain kinetic data that can be used in human risk assessment of titanium dioxide nanomaterials. Methods: Tissue distribution and blood kinetics of various titanium dioxide nanoparticles (NM-100, NM-101, NM-102, NM-103, and NM-104), which differ with respect to primary particle size, crystalline form and hydrophobicity, were investigated in rats up to 90 da…	TiO2: NM-100 (anatase), NM-101 (anatase), NM-102 (anatase), NM-103 (rutile, hydrophobic), NM-104 (rutile, hydrophobic)	A; R	TiO2: NM-100 (267), NM-101 (38), NM-102 (132), NM-103 (186), NM-104 (67)	25-50 nm; 50-100 nm; > 100 nm		NS	JRC	JRC	TiO2: NM-100 (10), NM-101 (320), NM-102 (90), NM-103 (60), NM-104 (60)	< 50; 50-100		NS	Probe sonication of the suspensions was performed on ice (Branson Sonifier S-450D, Branson Ultrasonics Corp., Danbury, CT, USA, equipped with a disruptor horn Model number: 101-147-037) for 16 minutes (400 W system and used with a 10% amplitude)	SONICATION	NS	Male (N = 30) and female (N = 6) Wistar rats: Liver, spleen and mesenteric lymph nodes (oral study)	MICE/RAT - BLOOD/SPLEEN/LIMPH NODES		NA/NS		NA/NS	Gavage	Oral gavage	- Single dose groups: one single dose - Repeated dose groups: five consecutive daily (Day 1–5) administrations		NS	d	- Single dose groups: one single dose of 2.3 mg/rat corresponding to 6.8-8.6 mg/kg bw for male rats depending on the actual weight of the rats - Repeated dose groups: five consecutive daily (Day 1–5) administrations of 2.3 mg TiO2 in one mL per rat resulting in a cumulative dose range of 34.1-42.4 mg/kg w for male orally treated rats and 54.5-59.9 mg/kg bw for female rats	6.8	59.9	mg/kg	DLS	DLS		- The majority of particles occurred as agglomerates/aggregates measuring between 80–150 nm - z-average: NM-101 (278.49±7.7), NM-102 (366.83±13.64), NM-103 (127.18±0.42), NM-104 (107.73±3.85)	100 - 500	No			No			No
2018	Proquin, Heloise; Jetten, Marlon J.; Jonkhout, Marloes C. M.; Guillermo Garduno-Balderas, Luis; Briede, Jacob J.; de Kok, Theo M.; van Loveren, Henk; Chirino, Yolanda I.	Transcriptomics analysis reveals new insights in E171-induced molecular alterations in a mouse model of colon cancer	10.1038/s41598-018-28063-z		Titanium dioxide as a food additive (E171) has been demonstrated to facilitate growth of chemically induced colorectal tumours in vivo and induce transcriptomic changes suggestive of an immune system impairment and cancer development. The present study aimed to investigate the molecular mechanisms behind the tumour stimulatory effects of E171 in combination with azoxymethane (AOM)/dextran sodium …	E171 (39% NPs and 61% MPs)	M		> 100 nm		NS	Sensient Technologies Company	Sensient		NS		NS	NS	NS	NS	BALB/c mice: distal colon	MICE/RAT - GIT		NA/NS		NA/NS	Gavage	Oral gavage	2, 7, 14, and 21 days		21	d	5 mg/kgbw/day	5	5	mg/kg/day		NS			NS	No			No			No	modulation of genes related to antioxidant production
2016	Urrutia-Ortega, Ismael M.; Garduno-Balderas, Luis G.; Delgado-Buenrostro, Norma L.; Freyre-Fonseca, Veronica; Flores-Flores, Jose O.; Gonzalez-Robles, Arturo; Pedraza-Chaverri, Jose; Hernandez-Pando, Rogelio; Rodriguez-Sosa, Miriam; Leon-Cabrera, Sonia; Terrazas, Luis I.; van Loveren, Henk; Chirino, Yolanda I.	Food-grade titanium dioxide exposure exacerbates tumor formation in colitis associated cancer model	10.1016/j.fct.2016.04.014		Colorectal cancer is the fourth worldwide cause of death and even if some dietary habits are consider risk factors, the contribution of food additives including foodgrade titanium dioxide (TiO2), designated as E171, has been poorly investigated. We hypothesized that oral E171 intake could have impact on the enhancement of colorectal tumor formation and we aimed to investigate if E171 administrati…	E171 - Food grade TiO2	M		> 100 nm		NS	Sensient Colors	Sensient		NS	-30	NEGATIVE	Dispersed in water, agglomerates with a hydrodynamic diameter of 300 nm	OTHER	NS	BALB/c male mice: colon, kidney, liver, spleen, lung tissue and blood samples	MICE/RAT - BLOOD/LIVER	Cell cultures derived from colon tissue	MURINE - OTHER		NA/NS	Gavage	Oral gavage	5 days (Monday to Friday)/10 weeks		50	d	5 mg/kg body weight weeks	5	5	mg/kg		NS			NS	Yes		Positive (+)	No			No
2013	Wang, Yun; Chen, Zhangjian; Ba, Te; Pu, Ji; Chen, Tian; Song, Yanshuang; Gu, Yongen; Qian, Qin; Xu, Yingying; Xiang, Kun; Wang, Haifang; Jia, Guang	Susceptibility of Young and Adult Rats to the Oral Toxicity of Titanium Dioxide Nanoparticles	10.1002/smll.201201185		Titanium dioxide nanoparticles (TiO2 NPs) have potential applications as food additives, but concerns persist about their safety. Children are identified as having the highest exposure and may face the greatest health risks. However, the toxicological sensitivity of TiO2 NPs in different ages is not clear. Here, a comparative toxicity study of TiO2 NPs in 3-week (youth) and 8-week (adult) old Spr…	Anatase	A	75 ± 15	50-100 nm		NS	Shangai Aladdin Reagent Co. Ltd	Aladdin	63.95	50-100	-33,46 (in H2O)	NEGATIVE	TiO2 NPs were dispersed in ultrapure water and ultrasonic vibrated for 15 min	SONICATION	NS	3-week (youth) and 8-week (adult) old Sprague-Dawley rats	MICE/RAT		NA/NS		NA/NS	Intragastric administration	Oral gavage	30 days		30	d	0, 10, 50, 200 mg kg−1 body weight per day for	10	200	mg/kg		NS			NS	No			No			Yes	GSH/GSSH
2000	Powell, JJ; Harvey, RSJ; Ashwood, P; Wolstencroft, R; Gershwin, ME; Thompson, RPH	Immune potentiation of ultrafine dietary particles in normal subjects and patients with inflammatory bowel disease	10.1006/jaut.1999.0342		Various specific and non-specific environmental factors have been associated with the induction and/or exacerbation of disease activity in patients with Crohn's disease and ulcerative colitis. One such factor is the potential role of ingested ultrafine particles. In fact, based on a Western diet, recent data suggest that more than 10(12) ultrafine particles are ingested per person every day. Thes…	Anatase	A	200	> 100 nm		NS	Tioxide Europe Ltd	Other		NS		NS	NS	NS	NS		NA/NS	Colonic biopsy specimens and peripheral blood mononuclear cells (explants)	HUMAN - OTHER	28 patients with ulcerative colitis, 21 with Crohn’s disease, and 36 healthy controls: colonic biopsy specimens and peripheral blood mononuclear cells	BLOOD/COLON		NA			NS	h	5 µg/ml	5	5	µg/mL		NS			NS	No			No			No
2015	Mohamed, Hanan Ramadan Hamad	Estimation of TiO2 nanoparticle-induced genotoxicity persistence and possible chronic gastritis-induction in mice	10.1016/j.fct.2015.05.018		Titanium dioxide (TiO2) nanoparticles are widely used as a food additive and coloring agent in many consumer products however limited data is available on the nano-TiO2 induced genotoxicity persistence. Thus, this study investigated the persistence of nano-TiO2 induced genotoxicity and possible induction of chronic gastritis in mice. The mice were orally administered 5, 50 or 500 mg/kg body weigh…	Mixture of rutile and anatase	M	43	25-50 nm		NS	Sigma Chemical Co.	Sigma		NS	-17.2	NEGATIVE	Ultra-sonicated in deionized distilled water using the biologics ultrasonic homogenizer (Model 150VT) immediately prior to characterization and administration and the pH value of nano-TiO2 suspensions was 6.8	SONICATION	NS	Sixty male Swiss Webster mice weighting 20-25 g and aged 10-12 weeks	MICE/RAT		NA/NS		NA/NS	Gavage	Oral gavage	5 consecutive days; mice from each dosage group were sacrificed 24 hours or one or two weeks after the last treatment		5	d	5, 50 or 500 mg/kg body weight nano-TiO2	5	500	mg/kg		NS			NS	No			No			Yes	malondialdehyde and nitric oxide levels; glutathione level
2012	Kermanizadeh, Ali; Gaiser, Birgit K.; Hutchison, Gary R.; Stone, Vicki	An in vitro liver model - assessing oxidative stress and genotoxicity following exposure of hepatocytes to a panel of engineered nanomaterials	10.1186/1743-8977-9-28		Background: Following exposure via inhalation, intratracheal instillation or ingestion some nanomaterials (NM) have been shown to translocate to the liver. Since oxidative stress has been implicated as a possible mechanism for NM toxicity this study aimed to investigate the effects of various materials (five titanium dioxide (TiO2), two zinc oxide (ZnO), two multi-walled carbon nanotubes (MWCNT) …	NM 101 (Anatase); NRCWE001 (Rutile); NRCWE002 (Rutile); NRCWE003 (Rutile); NRCWE004 (Rutile).	A; R	NM 101 (9); NRCWE001 (10); NRCWE002 (10); NRCWE003 (10); NRCWE004 (app. 100).	< 25 nm; 50-100 nm	NM 101 (185, 742); NRCWE001 (203); NRCWE002 (287); NRCWE003 (240, 1487); NRCWE004 (339).	> 100 nm	European Commission Joint Research Centre	JRC	NM 101 (322); NRCWE001 (99); NRCWE002 (84); NRCWE003 (84).	> 100		NS	Sonicated for 16 mins without pause following the protocol developed for ENPRA	SONICATION	NS		NA/NS	C3A cell line	HUMAN - OTHER		NA/NS		NA	24 h (except Detection of DNA strand breaks in C3A cells: 4h)	24		h	0.5–256 μg/ml	0.5	256	µg/mL		NS			NS	No			No			Yes	ROS production;
2019	Chen, Zhangjian; Han, Shuo; Zhou, Di; Zhou, Shupei; Jia, Guang	Effects of oral exposure to titanium dioxide nanoparticles on gut microbiota and gut-associated metabolism in vivo	10.1039/c9nr07580a		The antibacterial activity of titanium dioxide nanoparticles (TiO2 NPs) has been extensively documented and applied to food packaging or environmental protection. Ingestion of TiO2 NPs via dietary and environmental exposure may pose potential health risks by interacting with gut microbiota. We conducted an animal experiment to investigate the effects of oral exposure to TiO2 NPs on gut microbiota…	-	NS	29 ± 9 nm	25-50 nm		NS	Shanghai Macklin Reagent Co. Ltd	Other		NS	10	POSITIVE	TiO2 NPs were dispersed in ultrapure water and sonicated for 15 min	SONICATION	NS	Sprague-Dawley rats	MICE/RAT		NA/NS		NA/NS	Gavage	Oral gavage	Daily for 30 days		30	d	0, 2, 10, 50 mg kg−1	2	50	mg/kg		NS			NS	No			No			Yes
2018	Dekanski, Dragana; Spremo-Potparevic, Biljana; Bajic, Vladan; Zivkovic, Lada; Topalovic, Dijana; Sredojevic, Dusan N.; Lazic, Vesna; Nedeljkovic, Jovan M.	Acute toxicity study in mice of orally administrated TiO2 nanoparticles functionalized with caffeic acid	10.1016/j.fct.2018.02.064		The acute toxicity of surface-modified TiO2 nanoparticles (NPs) with caffeic acid (CA) was compared with those of its separate constituents (free CA and bare TiO2 NPs) upon their oral administration in laboratory mice. Prior to in vivo experiments, the interfacial charge transfer (ICT) complex between surface Ti atoms and CA is thoroughly characterized. Composition and stability constants of ICT …	-	NS	45 A	25-50 nm		NS		NS		NS		NS	NS	NS	Bare and surface-modified with caffeine	Mice liver, kidneys, spleen, blood, gastric and intestinal mucosa	MICE/RAT - LIVER/KIDNEY/SPLEEN/GIT/BLOOD		NA/NS		NA/NS	intragastrically by metal tube for oral gavage	Oral gavage	14 days		14	d	Acute dose of 1000 and 2000 mg/kg	1000	2000	mg/kg		NS			NS	No			No			No
2015	Taylor, Alicia A.; Marcus, Ian M.; Guysi, Risa L.; Walker, Sharon L.	Metal Oxide Nanoparticles Induce Minimal Phenotypic Changes in a Model Colon Gut Microbiota	10.1089/ees.2014.0518		Nanoparticles (NPs) are becoming prevalent in consumer goods, including foods and cosmetics. Understanding the interactions between NPs and bacteria in an engineered model colon can indicate potential impacts of NP exposure on the gut, and therefore overall human health. Human microbiome health has important implications to overall individual health. This work aims at quantifying the phenotypic r…	-	NS	21 nm	< 25 nm		NS	Evonik Degussa Corporation	Evonik		NS		NS	NS	NS	more characteristics are given in other reference	microbiota of the gut	OTHER		NA/NS		NA/NS		NA	5 days		5	d	3 mg/L	3	3	mg/L		NS			NS	No			No			No
2015	Fujiwara, Rina; Luo, Yi; Sasaki, Takamitsu; Fujii, Kiyonnu; Ohmori, Hitoshi; Kuniyasu, Hiroki	Cancer Therapeutic Effects of Titanium Dioxide Nanoparticies Are Associated with Oxidative Stress and Cytokine induction	10.1159/000439404		Nanoparticles (NPs) are considered to influence the inflammatory process; however, the precise mechanism and the significance in tumors are still not clear. In this study, when CT26 and LL2 mouse cancer cells were treated with 6-nm anatase titanium dioxide NPs (TDNPs) without ultraviolet irradiation, oxidative stress and induction of inflammatory cytokines were observed. Oxidative stress was furt…	anatase and rutile	A	6 nm (anatase) and 10-70 nm (rutile)	< 25 nm; 25-50 nm; 50-100 nm		NS	TEIKA Co., Osaka, Japan	Other		NS		NS	NS	NS	NS	Four-week-old male BALB/c mice and 5-week-old male Fisher 344 rats	MICE/RAT	CT26 and LL2 mouse cancer cells	MURINE - OTHER		NA/NS	For the NP aspiration model, TDNPs suspended in 200 μl of PBS were aspirated into the nose of Fischer 344 rats under anesthesia. For the NP oral model, TDNPs suspended in 200 μl PBS were administrated to BALB/c mice intragastrically. The toxicity of the different forms of TDNPs (200 μg) to BALB/c mice was determined following subcutaneous or intraperitoneal injection	NA		NS		h		NS	NS	NS		NS			NS	No			No			No	levels of 4-HNE and 8-OHdG
2019	Cao, Xiaoqiong; Han, Yanhui; Li, Fang; Li, Zhengze; McClements, David Julian; He, Lili; Decker, Eric A.; Xing, Baoshan; Xiao, Hang	Impact of protein-nanoparticle interactions on gastrointestinal fate of ingested nanoparticles: Not just simple protein corona effects	10.1016/j.impact.2018.12.002		The interaction of nanoparticles (NPs) with proteins in their surroundings is a key factor determining their biological fate. The formation of a protein corona around ingested NPs in complex food matrices and in the gastrointestinal tract (GIT) is known to impact their gastrointestinal fate. In this study, the interaction between titanium dioxide (TiO2) NPs from a common food additive (E171) and …	-	NS	5-15 nm	< 25 nm	30 nm	25-50 nm	US Research Nanomaterials (TX, USA)	Other		NS	30 mV	POSITIVE	NS	NS	NS	No	NA/NS	No	NA/NS	No	NA/NS		NA			NS	d		NS	NS	NS		NS			NS	No			No			No
2014	Orazizadeh, Mahmoud; Fakhredini, Fereshtesadat; Mansouri, Esrafil; Khorsandi, Layasadat	Effect of glycyrrhizic acid on titanium dioxide nanoparticles-induced hepatotoxicity in rats	10.1016/j.cbi.2014.07.001		Many recent studies demonstrate that most nanoparticles (NPs) have an adverse or toxic action on liver. The aim of this study was to investigate the hepatoprotective effect of glycyrrhizic acid (GA) against hepatic injury induced by titanium dioxide nanoparticles (NTiO2) in rats. Thirty-two Wistar rats were randomly divided into 4 groups. NTiO2-intoxicated rats received 300 mg/kg of NTiO2 for 14 …	-	NS	< 100 nm	< 25 nm; 25-50 nm; 50-100 nm		NS	Sigma	Sigma		NS		NS	NS	NS	NS	Wistar rats, liver and blood	MICE/RAT - BLOOD/LIVER		NA/NS		NA/NS	oral gavage	Oral gavage	14 days		14	d	300 mg/kg	300	300	mg/kg		NS			NS	No			No			Yes	MDA, SOD and GPx
2019	Mu, Wei; Wang, Yong; Huang, Chao; Fu, Yijing; Li, Jingquan; Wang, Hui; Jia, Xudong; Ba, Qian	Effect of Long-Term Intake of Dietary Titanium Dioxide Nanoparticles on Intestine Inflammation in Mice	10.1021/acs.jafc.9b02391	https://pubmed.ncbi.nlm.nih.gov/31361959	Early stage exposure of foodborne substances, such as brightening agent titanium dioxide nanoparticles (TiO(2) NPs), can cause long-term effects in adulthood. We aimed to explore the potential adverse effect of long-term dietary intake of TiO(2) NPs. After feeding for 2-3 months from weaning, TiO(2) NPs-exposed mice showed lower body weight and induced intestinal inflammation. However, this pheno…	anatase	A	10, 50 e 100 nm	< 25 nm; 25-50 nm; 50-100 nm	199.2, 433.8, 518.4	> 100 nm	DK Nanotechnology (Beijing, China)	Other		NS		NS	NS	NS	NS		NA/NS	C57BL/6J mice	MURINE - OTHER		NA/NS	Diet	Peroral exposure	3 moths		3	d	0.1% TiO2 in diet	?	?	?		NS			NS	No			No			No
2020	Sohal, I.S.; DeLoid, G.M.; O'Fallon, K.S.; Gaines, P.; Demokritou, P.; Bello, D.	Effects of ingested food-grade titanium dioxide, silicon dioxide, iron (III) oxide and zinc oxide nanoparticles on an in vitro model of intestinal epithelium: Comparison between monoculture vs. a mucus-secreting coculture model	10.1016/j.impact.2020.100209	https://www.scopus.com/inward/record.uri?eid=2-s2.0-85079374835&doi=10.1016%2fj.impact.2020.100209&partnerID=40&md5=ded5c122d7db7e7259a2216788f441c8	The majority of in vitro studies of ingested engineered nanomaterials (iENMs) in the past decade employed a Caco-2 monoculture test system. However, the small intestinal epithelium is much more complex and includes a defensive mucus layer secreted by goblet cells and submucosal glands. Here, we used a monoculture and a mucus-secreting coculture/triculture model to evaluate the toxicity of 5 food-…	TiO2 A200	M	100-150 nm (TEM)	> 100 nm		NS		NS		NS		NS	critical delivered sonication energy (DSEcr) was determined for each iENM using a standardized, reproducible, and validated dispersion protocol, which involves calorimetric calibration of the sonicator to determine the rate at which energy is delivered to the NP suspension. DSEcr was then used to prepare maximally homogenous and monodisperse NP suspensions in DI water. The DI water suspensions we…	SONICATION	Characterization is given on another reference. TiO2 were found to be insoluble in C2BBe1 cell culture medium		NA/NS	mucus-secreting coculture (C2BBe1-Caco - 2 subclone/HT29 -MTX ) and triculture (C2BBe1/HT29 -MTX/Raji B ) model s of the intestinal epithelium , and a C2BBe1 monoculture	HUMAN - CACO-2/HT29-MTX/RAJIB		NA/NS	culture medium	NA	24h	24		h	dose range of 0.25X to 2X around the nominal 1X dose (see article)	NS	NS	NS		NS		effective density of agglomerates in cell culture media was determined using the volume centrifugation method (VCM), and the fraction of administered dose delivered to cells was determined using the DG model	NS	No			Yes	TEER	No effect	No
2019	Blevins, Lance K.; Crawford, Robert B.; Bach, Anthony; Rizzo, Michael D.; Zhou, Jiajun; Henriquez, Joseph E.; Khan, D. M. Isha Olive; Sermet, Sera; Arnold, Lora L.; Pennington, Karen L.; Souza, Nathalia P.; Cohen, Samuel M.; Kaminski, Norbert E.	Evaluation of immunologic and intestinal effects in rats administered an E 171-containing diet, a food grade titanium dioxide (TiO2)	10.1016/j.fct.2019.110793		The toxicity of dietary E 171, a food grade titanium dioxide was evaluated. A recent study reported rats receiving E 171 in water developed inflammation and aberrant crypt foci (ACF) in the gastrointestinal tract. Here, rats received food containing E 171 (7 or 100 days). The 100-day study included feeding E 171 after dimethylhy-drazine (DMH) or vehicle only pretreatment. Food consumption was sim…	-	NS	110 and 115 nm (SEM)	> 100 nm		NS	Titanium Dioxide Manufacturers Association	Other		NS		NS	NS	NS	E171	Wistar Han IGS (Crl:WI (Han)) rats; blood, intestine, spleen, liver, testis	MICE/RAT - LIVER/SPLEEN/GIT/BLOOD/TESTIS		NA/NS		NA/NS	diet	Peroral exposure	7 or 100 days		100	d	2617 mg/kg in 7 days and 29,400 mg/kg in 100 days.	2617	29400	mg/kg	electron microscopy and direct volume/mass based methods	Electron microscopic analysis			NS	No			No			No
2016	Kim, Mi-Kyung; Lee, Jeong-A; Jo, Mi-Rae; Choi, Soo-Jin	Bioavailability of Silica, Titanium Dioxide, and Zinc Oxide Nanoparticles in Rats	10.1166/jnn.2016.12350		Inorganic nanoparticles have been widely applied to various industrial fields and biological applications. However, the question as to whether nanoparticles are more efficiently absorbed into the systemic circulation than bulk-sized materials remains to be unclear. In the present study, the physico-chemical and dissolution properties of the most extensively developed inorganic nanoparticles, such…	rutile	R	40 nm	25-50 nm		NS	Nanoamors (Houston, TX, USA	Other		NS	−26.3±1.2 (H2O); −22.8±1.2 (5% glucose)	NEGATIVE	NS	NS	NS	SD rats	MICE/RAT		NA/NS		NA/NS	oral administration and intravenous injection	Peroral exposure	0, 0.25, 0.5, 1, 2, 3, 4, 6, 10, 24, and 36 h after oral administration; 0, 1, 5, 10, 15, 20,30, 60, and 120 min post-injection		NS	d	500 mg/kg in oral gavage; 20 mg/kg intravenous injection	20	500	mg/kg	Powder X-ray diffraction (XRD), SEM, Zetasizer	SEM; X-ray; Zeta potential		626 nm	500 - 1000	No			No			No
2019	Meyer, Thomas; Venus, Tom; Sieg, Holger; Boehmert, Linda; Kunz, Birgitta M.; Krause, Benjamin; Jalili, Pegah; Hogeveen, Kevin; Chevance, Soizic; Gauffre, Fabienne; Burel, Agnes; Jungnickel, Harald; Tentschert, Jutta; Laux, Peter; Luch, Andreas; Braeuning, Albert; Lampen, Alfonso; Fessard, Valerie; Meyer, Jan; Estrela-Lopis, Irina	Simultaneous Quantification and Visualization of Titanium Dioxide Nanomaterial Uptake at the Single Cell Level in an In Vitro Model of the Human Small Intestine	10.1002/smtd.201800540		Useful properties render titanium dioxide nanomaterials (NMs) to be one of the most commonly used NMs worldwide. TiO2 powder is used as food additives (E171), which may contain up to 36% nanoparticles. Consequently, humans could be exposed to comparatively high amounts of NMs that may induce adverse effects of chronic exposure conditions. Visualization and quantification of cellular NM uptake as …	-	NS		NS	600 to 800 nm (NM103) and 380 to 600 nm (NM104) in DLS; 150 nm in NTA	> 100 nm	Joint Research Centre	JRC		NS	−16 ± 1 mV for both NM	NEGATIVE	NS	NS	hydrophobic NM103 and the hydrophilic NM104; They describe corona composition		NA/NS	Caco-2 cells	HUMAN - CACO-2		NA/NS	culture medium	NA	12 and 24h	24		h	20 and 100 μg mL−1	20	100	µg/mL	dynamic light scattering (DLS) and nanoparticle tracking analysis (NTA).	DLS; NTA		Microresolved particle induced X-ray emission (μPIXE) revealed aggregates with a diameter up to 11 μm	> 1000	Yes	IBM, ToF-SIMS, and TEM	Positive (+)	No			No
2017	Dudefoi, William; Moniz, Kristy; Allen-Vercoe, Emma; Ropers, Marie-Helene; Walker, Virginia K.	Impact of food grade and nano-TiO2 particles on a human intestinal community	10.1016/j.fct.2017.05.050		Titanium dioxide (TiO2) nanoparticles (NPs) are used as an additive (E171 or INS171) in foods such as gum, candy and puddings. To address concerns about the potential hazardous effects of ingested NPs, the toxicity of these food-grade NPs was investigated with a defined model intestinal bacterial community. Each titania preparation (food-grade TiO2 formulations, E171-1 and E171-6a) was tested at …	-	NS	< 25 nm	< 25 nm		NS	Degussa P25, Essen, Germany	Evonik		NS		NS	NS	NS	Characterization given in other reference	human gut bacterial community known as microbial ecosystem therapeutic-1 (MET-1), which contains 33 different bacterial strains and was originally established from the collected stool of a healthy donor	OTHER		NA/NS		NA/NS	culture serum	NA	48h	48		h	100 and 250 mg/mL	100	250	mg/mL	structure of the metal. The average particles size for TiO2 NPs was calculated using the Debye-	NS			NS	No			No			No
2018	Heller, Adam; Jarvis, Karalee; Coffman, Sheryl S.	Association of Type 2 Diabetes with Submicron Titanium Dioxide Crystals in the Pancreas	10.1021/acs.chemrestox.8b00047		Pigment-grade titanium dioxide (TiO2) of 200-300 nm particle diameter is the most widely used submicron-sized particle material. Inhaled and ingested TiO2 particles enter the bloodstream, are phagocytized by macrophages and neutrophils, are inflammatory, and activate the NLRP3 inflammasome. In this pilot study of 11 pancreatic specimens, 8 of the type 2 diabetic pancreas and 3 of the nondiabetic …	-	NS	110 ± 70 nm	> 100 nm		NS		NS		NS		NS	NS	NS	NS		NA/NS		NA/NS	Pancreatic specimens, from the pancreas head, three nondiabetic, 4 type 2 diabetic, and 4 T2D with pancreatitis	PANCREAS		NA			NS	d		NS	NS	NS	Sherrer equation (Mukherjee et al., 2015). Electron microscopic analysis (Xpert Pro) was done to	Electron microscopic analysis			NS	No			No			No
2020	Jafari, Abbas; Karimipour, Mojtaba; Khaksar, Mohammad Reza; Ghasemnejad-Berenji, Morteza	Protective effects of orally administered thymol against titanium dioxide nanoparticle-induced testicular damage	10.1007/s11356-019-06937-7		In this study, we investigated the potential of thymol and its mode of action to protect against the titanium dioxide (TiO2) nanoparticle-induced testicular damage. Twenty-four rats were randomly divided into four groups: control group, TiO2 (100 mg/kg BW/day) group, TiO2 + thymol (10 mg/kg BW/day) group, and TiO2 + thymol (30 mg/kg BW/day) group. With the exception of the control group, all anim…	anatase	A	40 nm	25-50 nm		NS	Cristal Global	Other		NS		NS	NS	NS	NS	male Wistar rats; testis	MICE/RAT - TESTIS		NA/NS		NA/NS	gavage	Oral gavage	60 days		60	d	100 mg/kg BW/day)	100	100	mg/kg/day	further display the aggregation pattern of the mixture.	NS			NS	No			No			Yes
2015	Grissa, Intissar; Elghoul, Jaber; Ezzi, Lobna; Chakroun, Sana; Kerkeni, Emna; Hassine, Mohsen; El Mir, Lassaad; Mehdi, Meriem; Ben Cheikh, Hassen; Haouas, Zohra	Anemia and genotoxicity induced by sub-chronic intragastric treatment of rats with titanium dioxide nanoparticles	10.1016/j.mrgentox.2015.09.005		Titanium dioxide nanoparticles (TiO2 NPs) are widely used for their whiteness and opacity. We investigated the hematological effects and genotoxicity of anatase TiO2 NPs following sub-chronic oral gavage treatment. TiO2-NPs were characterized by X-ray diffractometry (XRD), X-ray photoelectron spectroscopy (XPS), and transmission electron microscopy (TEM). Wistar rats were treated with anatase TiO…	anatase	A		NS		NS	AZ Tech (Italy)	Other		NS		NS	NS	NS	CAS Registry Number for TiO2 is 13463-67-7	Wistar rats; blood and bone marrow	MICE/RAT - BLOOD/BONE MARROW		NA/NS		NA/NS	oral gavage	Oral gavage	60 days		60	d	50, 100, and 200 mg/kg bw	50	200	mg/kg	X-ray diffractometry (XRD), X-ray photoelectron spectroscopy (XPS), and transmission electron microscopy (TEM)	X-ray			NS	No			No			No
2019	Dorier, Marie; Tisseyre, C√©line; Dussert, Fanny; B√©al, David; Arnal, Marie-Edith; Douki, Thierry; Valdiglesias, Vanessa; Laffon, Blanca; Fraga, S√≥nia; Brand√£o, F√°tima; Herlin-Boime, Nathalie; Barreau, Fr√©d√©rick; Rabilloud, Thierry; Carriere, Marie	Toxicological impact of acute exposure to E171 food additive and TiO(2) nanoparticles on a co-culture of Caco-2 and HT29-MTX intestinal cells	10.1016/j.mrgentox.2018.11.004	https://pubmed.ncbi.nlm.nih.gov/31561898	TiO(2) particles are widely used in products for everyday consumption, such as cosmetics and food; their possible adverse effects on human health must therefore be investigated. The aim of this study was to document in vitro impact of the food additive E171, i.e. TiO(2), and of TiO(2) nanoparticles, on a co-culture of Caco-2 and HT29-MTX cells, which is an in vitro model for human intestine. Cell…	A12 (95% anatase, 5% rutile; 12nm)	NS	24 ± 6 nm	< 25 nm	158 ± 1 (PdI: 0.16 ± 0.01)	> 100 nm	JCR	JRC	46 m²/g	< 50	47.7 W	POSITIVE	30 min at 80% of amplitude, 4 °C (Huber minichiller), using high energy sonication (Bioblock Scientific, Vibracell 75041) with an indirect cup-type sonicator (Cup Horn), immediately before cell exposure.	SONICATION	NS	no	NA/NS	Caco-2 and HT29-MTX	HUMAN - CACO-2/HT29-MTX	no	NA/NS	internalized into gastrointestinal cells	NA	6,24,48h	48		h		NS	NS	NS	fluorescence activated cell sorting	NS			NS	No			No			yes
2015	Teubl, Birgit J.; Schimpel, Christa; Leitinger, Gerd; Bauer, Bettina; Froehlich, Eleonore; Zimmer, Andreas; Roblegg, Eva	Interactions between nano-TiO2 and the oral cavity: Impact of nanomaterial surface hydrophilicity/hydrophobicity	10.1016/j.jhazmat.2014.12.064		Titanium dioxide (TiO2) nanoparticles are available in a variety of oral applications, such as food additives and cosmetic products. Thus, questions about their potential impact on the oro-gastrointestinal route rise. The oral cavity represents the first portal of entry and is known to rapidly interact with nanopartides. Surface charge and size contribute actively to the particle cell interaction…	E171 (>95% anatase, 118 nm)	R	20	< 25 nm	NM103 (1819±61.56); NM104 (1539±489)	> 100 nm	OECD	JRC		NS		NS	NS	NS	Particle characterization was addressed with dynamic light scattering andlaser diffraction.	ex vivo porcine cells, Human buccal epithelial TR146 cells	OTHER	ex vivo porcine cells, Human buccal epithelial TR146 cells	HUMAN - OTHER		NA/NS	oral cavity	Peroral exposure	4h		0.17	d		NS	NS	NS	Transmission electron microscopy (TEM)/energy filteredtransmission microscopy (EFTEM	TEM			NS	No			No			yes	ROS production
2017	Ammendolia, Maria Grazia; Iosi, Francesca; Maranghi, Francesca; Tassinari, Roberta; Cubadda, Francesco; Aureli, Federica; Raggi, Andrea; Superti, Fabiana; Mantovani, Alberto; De Berardis, Barbara	Short-term oral exposure to low doses of nano-sized TiO2 and potential modulatory effects on intestinal cells	10.1016/j.fct.2017.01.031		The present study investigated potential modulatory effects of low doses of nano-sized titanium dioxide (TiO2) on intestinal cells in vivo and in vitro. After short-term exposure to TiO2 nanoparticles in rats, histopathological analysis of intestinal tissues indicated a gender-specific effect with increased length of intestinal villi in male rats only. Moreover the intestinal tissue showed nanopa…	NM-105 (86% anatase, 24 nm)	A	<25	< 25 nm		NS	Sigma-Aldrich and Run He Ltd	Sigma	45-55	< 50; 50-100		NS	NS	NS	NS	rats/intestine	MICE/RAT - GIT	HT-29	HUMAN - HT29		NA/NS	gavage	Oral gavage	15 min		0.01	d	1.8-36ug/mL	1.8	36	µg/mL		NS			NS	Yes	ICP-MS; electron microscopy	Positive (+)	No			Yes	ROS production
2014	Chen, Zhangjian; Wang, Yun; Ba, Te; Li, Yang; Pu, Ji; Chen, Tian; Song, Yanshuang; Gu, Yongen; Qian, Qin; Yang, Jinglin; Jia, Guang	Genotoxic evaluation of titanium dioxide nanoparticles in vivo and in vitro	10.1016/j.toxlet.2014.02.020		With the extensive application of titanium dioxide (TiO2) nanoparticles (NPs) in food industry, there is a rising debate concerning the possible risk associated with exposure to TiO2 NPs. The purpose of this study is to evaluate the genotoxicity of TiO2 NPs using in vivo and in vitro test systems. In vivo study, the adult male Sprague-Dawley rats were exposed to anatase TiO2 NPs (75 +/- 15 nm) th…	anatase	A	75 ± 15	50-100 nm		NS	Shangai Aladine	Aladdin	63.95	50-100		NS	NS	NS	NS	adult male Sprague-Dawley rats	MICE/RAT	Chinese hamster lung fibroblasts(V79 cells)	MURINE - OTHER		NA/NS	intragastricadministration	Oral gavage	In vivo: 30 days; In vitro: 24-48h		NS	d	in vivo: 0, 10, 50 and 200 mg/kg body weight; in vitro: 0, 5, 10, 20, 50 and 100 g/mL.	10	200	mg/kg		NS			NS	No			No			No
2018	Hassanein, Khaled M. A.; El-Amir, Yasmin O.	Ameliorative effects of thymoquinone on titanium dioxide nanoparticles induced acute toxicity in rats	10.1016/j.ijvsm.2018.02.002		Although the nanoparticles had a beneficial activity, it had also adverse effects as a result of generation of oxidative stress. The current study aimed to assess the ameliorative effect of thymoquinone (TQ) on titanium dioxide nanoparticles (TiO2 NPs) induced acute toxicity in male rats. Forty-eight male rats were distributed into four equal groups (12 rats each). Group (1) received single oral …	-	NS		NS		NS	Sigma Aldrich	Sigma		NS		NS	NS	NS	NS	rats/liver and testis	MICE/RAT - LIVER/TESTIS		NA/NS		NA/NS	digestive (stomach tube)	Oral gavage	14 days		14	d	300 mg/kg b.w.)	300	300	mg/kg		NS			NS	No			No			yes
2012	Veronesi, G.; Brun, E.; Fayard, B.; Cotte, M.; Carriere, M.	Structural properties of rutile TiO2 nanoparticles accumulated in a model of gastrointestinal epithelium elucidated by micro-beam x-ray absorption fine structure spectroscopy	10.1063/1.4720172		Micro-beam x-ray absorption fine structure spectroscopy was used to investigate rutile TiO2 nanoparticles internalized into gastrointestinal cells during their crossing of a gut model barrier. Nanoparticles diluted in culture medium tend to accumulate in cells after 48 h exposure; however, no spectral differences arise between particles in cellular and in acellular environments, as corroborated b…	rutile	R	21	< 25 nm		NS		NS		NS		NS	NS	NS	NS		NA/NS	co-culture of the subclone clone 1 of Caco-2 cells and Raji-B lymphocytes,	HUMAN - CACO-2/RAJIB		NA/NS	internalized into gastrointestinal cells during their crossing of a gut model barrier	NA	48h	48		h	50 ug/ml diluted in complete medium	50	50	µg/mL	Micro-beam x-ray absorption fine structure spectroscopy (l-XAFS)	I-XAFS			NS	No			yes	accumulation in the GI epithelium	Positive	No
2014	Elbastawisy, Yasser M.; Almasry, Shaima M.	Histomorphological evaluation of maternal and neonatal distal airspaces after maternal intake of nanoparticulate titanium dioxide: an experimental study in Wistar rats	10.1007/s10735-013-9531-6		This study was performed to determine the histomorphological alterations occurring in maternal and neonatal pulmonary distal airspaces of Wistar rats after maternal administration of titanium dioxide nanoparticles (TiO2 NPs). Thirty adult pregnant rats (150-250 g) and their offspring were used in this study. Pregnant rats were randomly divided into control (n = 15) and TiO2 NP-treated (n = 15) gr…	-	NS	21	< 25 nm		NS	Sigma- Aldrich Co. (St. Louis, MO, USA; product 718467, CAS number 13463-67-7)	Sigma	35–65	< 50; 50-100		NS	NS	NS	density: 4.26 g/ml at 25 C, molecular weight: 79.87 and purity: 99.5 %.	albino Wistar Han rats (150–250 g) and their offspring/lungs	MICE/RAT - LUNGS		NA/NS		NA/NS	oral gavage	Oral gavage	7 consecutive days		7	d	0.1 ml/10 g body weight	0.01	mL/g	mL/g	energy-dispersive X-ray (EDX)	X-ray			NS	No			No			No
2020	Cao, X.; Zhang, T.; DeLoid, G.M.; Gaffrey, M.J.; Weitz, K.K.; Thrall, B.D.; Qian, W.-J.; Demokritou, P.	Evaluation of the cytotoxic and cellular proteome impacts of food-grade TiO2 (E171) using simulated gastrointestinal digestions and a tri-culture small intestinal epithelial model	10.1016/j.impact.2019.100202	https://www.scopus.com/inward/record.uri?eid=2-s2.0-85076763901&doi=10.1016%2fj.impact.2019.100202&partnerID=40&md5=f314db753e71a8dcdd16775cd01b652f	Engineered nanomaterials (ENMs) are widely used in the food industry; however, regulations for ENMs in food are still in the early stages of development due to insufficient health data. This study investigated the cytotoxicity and changes to the proteomic profile in an in vitro small intestinal epithelium model after exposure to digested food models containing the ubiquitous engineered particulat…	E171	NS	110	> 100 nm		NS	Pronto Foods Co. (Chicago, IL, USA).	Other		NS		NS	NS	NS	NS		NA/NS	Caco-2 cells, HT29-MTX and Raji B cells	HUMAN - CACO-2/HT29-MTX/RAJIB		NA/NS	internalized into gastrointestinal cells	NA	24h	24		h	150 and 300 mg Ti/kg body weight/day.	150	300	mg/kg/day		NS			NS	No			No			yes
2013	Chen, Xin-Xin; Cheng, Bin; Yang, Yi-Xin; Cao, Aoneng; Liu, Jia-Hui; Du, Li-Jing; Liu, Yuanfang; Zhao, Yuliang; Wang, Haifang	Characterization and Preliminary Toxicity Assay of Nano-Titanium Dioxide Additive in Sugar-Coated Chewing Gum	10.1002/smll.201201506		Nanotechnology shows great potential for producing food with higher quality and better taste through including new additives, improving nutrient delivery, and using better packaging. However, lack of investigations on safety issues of nanofood has resulted in public fears. How to characterize engineered nanomaterials in food and assess the toxicity and health impact of nanofood remains a big chal…	anastase	A	40-300	25-50 nm; 50-100 nm; >100 nm		NS	Central Iron & Steel Research Institute, China	Other		NS	− 42.6, − 38.1, − 38.9, − 35.6, − 24.4, and − 21.4 mV,	NEGATIVE	NS	NS	NS		NA/NS	human gastric epithelial cell GES-1 and Caco-2	HUMAN - CACO-2/GES-1	chewed	NA/NS	internalized into gastrointestinal cells; gums chewed by 4 volunteers	NA	chewed 10 and 30 min	NS		h		NS	NS	NS		NS			NS	No			No			No
2014	Shrivastava, Rupal; Raza, Saimah; Yadav, Abhishek; Kushwaha, Pramod; Flora, Swaran J. S.	Effects of sub-acute exposure to TiO2, ZnO and Al2O3 nanoparticles on oxidative stress and histological changes in mouse liver and brain	10.3109/01480545.2013.866134		Nanomaterials are at the leading edge of the rapidly developing field of nanotechnology. However the information regarding toxicity of these nanoparticles on humans and environment is still deficient. The present study investigated the toxic effects of three metal oxide nanoparticles, TiO2, ZnO and Al2O3 on mouse erythrocytes, brain and liver. Male mice were administered a single oral dose of 500…	both	M	50-75	50-100 nm		NS	Sigma Aldrich (St. Louis, MO).	Sigma		NS		NS	sonicated 30 min	SONICATION	NS	rats/mouse erythrocytes, brain and liver	MICE/RAT- LIVER/BRAIN/BLOOD		NA/NS		NA/NS	administered a single oral dose	Peroral exposure	21 consecutive days		21	d	500 mg/kg	500	500	mg/kg		NS			NS	No			No			yes
2007	Wang, Jiangxue; Zhou, Guoqiang; Chen, Chunying; Yu, Hongwei; Wang, Tiancheng; Ma, Yongmei; Jia, Guang; Gao, Yuxi; Li, Bai; Sun, Jin; Li, Yufeng; Jiao, Fang; Zhao, Yuliang; Chai, Zhifang	Acute toxicity and biodistribution of different sized titanium dioxide particles in mice after oral administration	10.1016/j.toxlet.2006.12.001		In order to evaluate the toxicity of TiO2 particles, the acute toxicity of nano-sized TiO2 particles (25 and 80 nm) on adult mice was investigated compared with fine TiO2 particles (155 nm). Due to the low toxicity, a fixed large dose of 5 g/kg body weight of TiO2 suspensions was administrated by a single oral gavage according to the OECD procedure. In 2 weeks, TiO2 particles showed no obvious ac…	-	NS	80, 25, 155±33	25-50 nm; 50-100 nm; >100 nm		NS	(Hangzhou Dayang Nanotechnology Co. Ltd., and Zhonglian Chemical Medicine Co	Other		NS		NS	ultrasonic for 15–20 min and mechanically vibrated for 2 or 3 min.	SONICATION	NS	mice/liver, spleen, kidneys, and lung tissues	MICE/RAT - LIVER/SPLEEN/KIDNEY/LUNG		NA/NS		NA/NS	single oral gavage	Oral gavage	2 weeks		14	d	5 g/kg	5	5	g/kg		NS	Biochemical parameters in serum and histopathological evaluation		NS	No			No			No
2015	Guglielmotti, M.B.; Domingo, M.G.; Steimetz, T.; Ramos, E.; Paparella, M.L.; Olmedo, D.G.	Migration of titanium dioxide microparticles and nanoparticles through the body and deposition in the gingiva: An experimental study in rats	10.1111/eos.12190	https://www.scopus.com/inward/record.uri?eid=2-s2.0-84935757108&doi=10.1111%2feos.12190&partnerID=40&md5=a5d6b84cacc3194178bca256ce458bb3	The aim of this experimental work was to evaluate deposition of titanium dioxide (TiO<inf>2</inf>) microparticles and nanoparticles, which could originate from titanium bioimplants, in the gingiva. Wistar rats were injected intraperitoneally (i.p.) with a suspension of TiO<inf>2</inf> particles of different sizes (150, 10, or 5 nm). The rats were killed 12 months post-injection, and the buccal an…	anatase	A	150, 10, or 5	> 100 nm		NS	Sigma Chemical Company, St Louis, MO, USA;Nanostructured and Amorphous Materials, Los Alamos, NM, USA);	Sigma		NS		NS	NS	NS	NS	rats/gingiva	MICE/RAT - GIT		NA/NS		NA/NS	Wistar rats were injected intraperitoneally (i.p.)	Intraperitoneal	12 months		365	d	1.6 g of TiO2 particles/1,000 g body weight,	1.6	1.6	g/kg	Macroscopic and light-microscopic study of tissues, Scanning electron microscopy and chemical characterization of particles in gingival tissues, Titanium concentration in gingiva, Immunohistochemistry	SEM			NS	No			No			No
2018	Setyawati, Magdiel Inggrid; Sevencan, Cansu; Bay, Boon Huat; Xie, Jianping; Zhang, Yongbin; Demokritou, Philip; Leong, David Tai	Nano-TiO2 Drives Epithelial-Mesenchymal Transition in Intestinal Epithelial Cancer Cells	10.1002/smll.201800922		The majority of cancer mortality is associated with cancer metastasis. Epithelial-to-mesenchymal transition (EMT) is a process by which cells attain migratory and invasive properties, eventually leading to cancer metastasis. Here, it is shown that titanium dioxide nanoparticles (nano-TiO2), a common food additive, can induce the EMT process in colorectal cancer cells. Nano-TiO2 exposure is observ…	-	NS	21	< 25 nm	106	> 100 nm	Evonik Degussa (USA)	Evonik		NS		NS	Dispersion was facilitated through sonication (1 min) in an ice bath.	SONICATION	NS		NA/NS	nonmetastatic colorectal cancer cells, SW480	HUMAN - OTHER		NA/NS	internalized into cells	NA	4 days	96		h	100 × 10−6, 250 × 10−6, 500 × 10−6 M	100	500	µM		NS	Intracellular ROS Production, Immunoblotting, Immunoprecipitation, and Immunofluorescence,		NS	No			No			yes
2016	Heringa, Minne B.; Geraets, Liesbeth; van Eijkeren, Jan C. H.; Vandebriel, Rob J.; de Jong, Wim H.; Oomen, Agnes G.	Risk assessment of titanium dioxide nanoparticles via oral exposure, including toxicokinetic considerations	10.1080/17435390.2016.1238113		Titanium dioxide white pigment consists of particles of various sizes, from which a fraction is in the nano range (<100nm). It is applied in food as additive E 171 as well as in other products, such as food supplements and toothpaste. Here, we assessed whether a human health risk can be expected from oral ingestion of these titanium dioxide nanoparticles (TiO2 NPs), based on currently available i…	-	NS		NS		NS		NS		NS		NS	NS	NS	NS		NA/NS		NA/NS		NA/NS		NA						NS	NS	NS		NS			NS	No			No			No
2016	Mohammadipour, Abbas; Hosseini, Mahmoud; Fazel, Alireza; Haghir, Hossein; Rafatpanah, Houshang; Pourganji, Masoume; Bideskan, Alireza Ebrahimzadeh	The effects of exposure to titanium dioxide nanoparticles during lactation period on learning and memory of rat offspring	10.1177/0748233713498440		Nanoscale titanium dioxide (TiO2), which is massively produced and widely used in living environment, seems to have a potential risk on human health. The central nervous system (CNS) is the potential susceptible target of nanoparticles, but the studies on this aspect are limited so far. The aim of this study was to evaluate the effects of exposure to TiO2 nanoparticles during lactation period on …	anatase	A	10	< 25 nm		NS	Nano Lima Co. (Tehran, Iran).	Other	>150 m2/g,	> 100		NS	NS	NS	NS	Lactating Wistar rats	MICE/RAT		NA/NS		NA/NS	gavage	Oral gavage	21 days		21	d	100 mg/kg	100	100	mg/kg	Nanoparticle characterization by transmission electron microscopy, Behavioral tests	TEM			NS	No			No			No
2011	Philbrook, Nicola A.; Winn, Louise M.; Afrooz, A. R. M. Nabiul; Saleh, Navid B.; Walker, Virginia K.	The effect of TiO2 and Ag nanoparticles on reproduction and development of Drosophila melanogaster and CD-1 mice	10.1016/j.taap.2011.09.027		In the last two decades, nanoparticles (NPs) have found applications in a wide variety of consumer goods. Titanium dioxide (TiO2) and silver (Ag) NPs are both found in cosmetics and foods, but their increasing use is of concern due to their ability to be taken up by biological systems. While there are some reports of TiO2 and Ag NPs affecting complex organisms, their effects on reproduction and d…	99.5% pure and rutile	A; R	50	50-100 nm		NS	(MK Impex Canada, Mississauga, ON)	Other		NS		NS	NPs were sonicated in the gum solution for 90 s, immediately prior to dosing, to ensure even suspension	SONICATION	NS	CD-1 mice/fetal skeletons; Drosophila melanogaster/eggs	OTHER		NA/NS		NA/NS	mice: oral gavage; D.m: addition to food	Oral gavage	mice: 19 days; dm: 14 days		19	d	mice: 10, 100, 1000 mg/kg; dm:0.005%, 0.01%, 0.05%, 0.1%, 0.5% w/v	10	1000	mg/kg		NS	mouse fetal skeletons, D.M. egg and larval development assessments		NS	No			No			No
2019	Bartel, Leah K.; Hunter, Daniel A.; Anderson, Kayla B.; Yau, W.; Wu, Ji; Gato, Worlanyo E.	Short-term evaluation of hepatic toxicity of titanium dioxide nanofiber (TDNF)	10.1080/01480545.2018.1459671		Various in vitro and in vivo studies have shown titanium dioxide nanoparticles (TDNPs) increase the production of reactive oxygen species and change the expression of genes and proteins involved in the inflammatory response and cell division. Although, the cytotoxicity of TDNPs has been shown to be largely dependent on the characteristics of the particles including shape and surface area. This pr…	-	NS		NS		NS	Synthetized from titanium isopropoxide (Sigma)	Sigma		NS		NS	sonication, 30 min	SONICATION	NS	Male Sprague-Dawley rats (6–7 weeks old) Liver cells	MICE/RAT	-	NA/NS	-	NA/NS	oral gavage	Oral gavage	2 weeks		14	d	0, 40, 60 ppm	40	60	mg/kg	SEM	SEM			NS	No			No			No
2014	Mohammadipour, Abbas; Fazel, Alireza; Haghir, Hossein; Motejaded, Fatemeh; Rafatpanah, Houshang; Zabihi, Hoda; Hosseini, Mahmoud; Bideskan, Alireza Ebrahimzadeh	Maternal exposure to titanium dioxide nanoparticles during pregnancy; impaired memory and decreased hippocampal cell proliferation in rat offspring	10.1016/j.etap.2014.01.014	https://pubmed.ncbi.nlm.nih.gov/24577229	Titanium dioxide nanoparticles (TiO2-NPs) are massively produced in the environment, and because of their wide usage, they are a potential risk of damage to human health. TiO2-NPs are often used as additives for paints, papers, and foods. The central nervous system (CNS), including hippocampal regions, is potentially susceptible targets for TiO2-NPs. This study aimed to determine the effects of e…	anatase	A	10 nm	< 25 nm		NS	NanoLima, Co. (Iran)	Other	> 150 m2/g	> 100		NS	TiO2- NPs were suspended in distilled water. Quantitative suspensions (100 mg/kg) were prepared fresh every day and fed to the rats with gavage.	OTHER	purity +99%, density 3,9 g/m3	Pregnant Wistar rats	MICE/RAT		NA/NS	-	NA/NS	oral by gavage	Oral gavage	Prenatal day 2 to day 21		21	d	100 mg/kg TiO2	100	100	mg/kg	ICP-MS	ICP-MS			NS	Yes	titanium accumulated in the hippocampus of rats	Positive (+)	No			No
2016	Shrestha, Surakshya; Mao, Zhengwei; Fedutik, Yuri; Gao, Changyou	Influence of titanium dioxide nanorods with different surface chemistry on the differentiation of rat bone marrow mesenchymal stem cells	10.1039/c6tb02149b		In this study, four kinds of TiO2 nanorods (TiO2 NRs), with similar aspect ratios but different surface functional groups, i.e. amines (-NH2), carboxyl groups (-COOH) and poly(ethylene glycol) (-PEG), were used to study their interaction with rat bone marrow stem cells (MSCs). The aspect ratios of the TiO2 NRs were measured (50 to 65 nm in length and 8 nm in width) under transmission electron mic…	-	NS		NS	200-300 nm	> 100 nm	PlasmaChem, Berlin, Germany	Other		NS	-20.9 - +35.2	NEGATIVE; POSITIVE	A stock solution of each TiO2 NRs was prepared in water (5 mg mL_x0002_1) by vigorous vortexing for 1 min and sonication (Misonix, Ultrasonic Liquid Processor) for 5 min. The stock solution was stored at 4 1C and sonicated for 1 min before further use.	SONICATION	all kinds of TiO2 NRs formed agglomerated bundles in a dry state.	Rat mesenchymal stem cells (MSCs) isolated from the bone-marrow of Sprague-Dawley rats	MICE/RAT - BONE MARROW	in vitro (ex vivo)	NA/NS		NA/NS		NA	24h	24		h	10 ug/mL	10	10	µg/mL	TEM ICP-MS	ICP-MS; TEM			NS	Yes		Positive (+)	No			Yes	ROS production
2018	Faheem, N.M.; Elsaid, A.G.	Amelioration of titanium dioxide nanoparticles induced injury on the cerebellum of the adult mice by a hydromethanolic root extract of Withania somnifera	10.21608/ejh.2019.28761	https://www.scopus.com/inward/record.uri?eid=2-s2.0-85066870448&doi=10.21608%2fejh.2019.28761&partnerID=40&md5=f42347fa503e9df7560321104d26f199	Introduction: Titanium Dioxide (TiO2) nanoparticles have potential risks to human health. They were able to enter brain to be detected in the cerebral cortex, cerebellum and hippocampus. Withania somnifera (WS) improve rotenone induced damage in cerebellum. Aim of the work: To study the effects of oral administration of TiO2 nanoparticles on the cerebellum and the protective role of hydromethanol…	-	NS	21 nm	< 25 nm		NS	Sigma Egypt	Sigma		NS		NS	NS	NS	purity >=99,5%	Seventy five healthy male mice Cerebelum (astrocytes, Purkinje cells)	MICE/RAT	-	NA/NS	-	NA/NS	Oral	Peroral exposure	60 days		60	d	Group 1 (control group): received 1 ml of distilled water orally through a gastric tube once daily for sixty days. Group 2 (gum acacia group): received 1ml of 5% gum acacia solution (solvent of TiO2 nanoparticles) orally through a gastric tube once daily for sixty days. Group 3 (WS root extract group): received hydromethanolic WS root extract at a dose of 500 mg/kg orally through a gastric tube o…	150	150	mg/kg	DLS	DLS		200-300 nm	100 - 500	No			No			No	nNOS immunostaining
2019	Hu, Hailong; Fan, Xingpei; Yin, Yao; Guo, Qian; Yang, Daqian; Wei, Xiangjuan; Zhang, Boya; Liu, Jing; Wu, Qiong; Oh, Yuri; Chen, Kun; Feng, Yujie; Hou, Liping; Li, Li; Gu, Ning	Mechanisms of titanium dioxide nanoparticle-induced oxidative stress and modulation of plasma glucose in mice	10.1002/tox.22823		Titanium dioxide nanoparticles (TiO2 NPs) are reported to increase plasma glucose levels in mice at specific doses. The production and accumulation of reactive oxygen species (ROS) is potentially the most important factor underlying the biological toxicity of TiO2 NPs but the underlying mechanisms are unclear at present. Data from genome-wide analyses showed that TiO2 NPs induce endoplasmic retic…	anatase/rutile	M	< 25 nm	< 25 nm	36,02±3,83 nm	25-50 nm	Sigma (Darmstadt, Germany)	Sigma		NS	-17.31±3.50	NEGATIVE	Ultrasonic bath, frequency 40 kHz, power 400 W, 30 minutes	SONICATION	NS	Six-week-old ICR Mice	MICE/RAT	NIH/3T3 cells	MURINE - OTHER	-	NA/NS	Oral	Peroral exposure	26 weeks		112	d	50 mg/kg bw/day	50	50	mg/kg/day	DLS, SEM	DLS; SEM		21,33 ± 3,15 nm (SEM) 36,02 ± 3,83 nm (DLS)	< 100	No			No			Yes	T-SOD and GSH
2002	Evans, SM; Ashwood, P; Warley, A; Berisha, F; Thompson, RPH; Powell, JJ	The role of dietary microparticles and calcium in apoptosis and interleukin-1 beta release of intestinal macrophages	10.1053/gast.2002.36554		Background & Aims: The intestinal mucosa is exposed to micron-sized, man-made exogenous particles (e.g., titanium dioxide) and freshly formed endogenous particles (calcium phosphate). A role for such microparticles in inflammation has been proposed, and here we examined their effects on lamina propria mononuclear cells. Methods: Lamina propria mononuclear cells were isolated from patients with an…	-	NS	mean 0.2-µm diameter	> 100 nm		NS	Tioxide UK Ltd., Cleveland, England	Other		NS		NS	NS	NS	NS		NA/NS	-	NA/NS	Lamina propria mononuclear cells (LPMNCs)	BLOOD		NA					1 ng/mL of LPS , 5 µg/mL of TiO2 , 4 mmol/L of CaCl2, or at the same final concentrations as the conjugate (TiO2-Ca2+-LPS).	5	5	µg/mL	The conjugate was prepared by mixing and sonication (Ultrawave- USO, Ultrawave Ltd., Cardiff, England) of the single components in ultra highly purified water (18 M /cm) (Elga, High Wycombe, England), as previously described. Effective conjugation was again confirmed by flow cytometric (FACS) analysis with fluorescently labeled LPS (data not shown).	NS			NS	No			No			No
2018	Proquin, HeloIse; Jetten, Marlon J.; Jonkhout, Marloes C. M.; Garduno-Balderas, Luis G.; Briede, Jacob J.; de Kok, Theo M.; Chirino, Yolanda I.; van Loveren, Henk	Gene expression profiling in colon of mice exposed to food additive titanium dioxide (E171)	10.1016/j.fct.2017.11.011		Dietary factors that may influence the risks of colorectal cancer, including specific supplements, are under investigation. Previous studies showed the capacity of food additive titanium dioxide (E171) to induce DNA damage in vitro and facilitate growth of colorectal tumours in vivo. This study aimed to investigate the molecular mechanisms behind these effects after E171 exposure. BALB/c mice wer…	E171	NS	316.8 ± 282.4	> 100 nm		NS	Sensient Technologies Company in Mexico	Sensient		NS	−12.78 ± 0.52	NEGATIVE	One milligram of E171 was sterilized, resuspended in 1 mL of water and sonicated for 30 min at 60 Hz.	SONICATION	NS	BALB/c mice, 4-6weeks old	MICE/RAT	No	NA/NS	No	NA/NS	Gavage	Oral gavage	21 days (Monday-Friday, 5 days a week)		21	d	5 mg/kg bw	5	5	mg/kg		NS			NS	No			No			Yes	Oxidative stress
2018	Hu, Hailong; Li, Li; Guo, Qian; Zong, He; Yan, Yuheng; Yin, Yao; Wang, Yu; Oh, Yuri; Feng, Yujie; Wu, Qiong; Gu, Ning	RNA sequencing analysis shows that titanium dioxide nanoparticles induce endoplasmic reticulum stress, which has a central role in mediating plasma glucose in mice	10.1080/17435390.2018.1446560		Titanium dioxide nanoparticles (TiO2 NPs) constitute the top five NPs in use today. In this study, oral administration of 50, 100, and 200 mg/kg body weight (b.w.) TiO2 NPs increases plasma glucose in mice, whereas 10 and 20 mg/kg b.w. TiO2 NPs did not. RNA sequencing (RNA-seq) technology was used to investigate genome-wide effects of TiO2 NPs. Clustering analysis of the RNA-seq data showed the m…	P25 (80/20 anatase/rutile)	M	26.42 ± 7.73 nm	25-50 nm	42.15 ± 6.71nm	25-50 nm	Sigma Co., Ltd. (Roedermark, Germany)	Sigma		NS	negative	NEGATIVE	Ultrasonic bath, 40 kHz, 400W, 30 min	SONICATION	TiO2 NPs had a near-spherical shape and were well dispersed	Six-week-old ICR mice	MICE/RAT	-	NA/NS	-	NA/NS	Oral	Peroral exposure	26 weeks		182	d	10, 20,50,100, 200 mg/kg Bw	10	200	mg/kg	ICP-OES	ICP-OES			NS	Yes	Titanium concentrations were increased in the liver, pancreas, spleen, kidney, and small intestine of the mice in all TiO2 NPs groups.	Positive (+)	No			Yes	Total SOD (T-SOD) and GSH, levels of malondialdehyde (MDA)
2019	Zhou, Yingjun; Hong, Fashui; Wu, Nan; Ji, Jianhui; Cui, Yonghua; Li, Jinyan; Zhuang, Juan; Wang, Ling	Suppression of ovarian follicle development by nano TiO2 is associated with TGF-beta-mediated signaling pathways	10.1002/jbm.a.36558		Nanoparticulate titanium dioxide (nano TiO2) is extensively applied in biological tissue engineering materials, food additives, cosmetics, and sunscreens. Numerous studies to date have demonstrated that nano TiO2 penetrates through the digestive system and possibly the blood circulation, leading to accumulation in the ovary and consequent reproductive toxicity. However, the mechanisms underlying …	Anatase	A	6-7	< 25 nm	294	> 100 nm	Professor Ping Yang (College of Chemistry, Soochow University)	Other	174.8	> 100	9.28	POSITIVE	NS	NS	NS	healthy ICR (Imprinting Control Region, Specific Pathogen Free [SPF] grade) female mice (20±2 g) Ovary, follicules	MICE/RAT	-	NA/NS	-	NA/NS	Oral (gavage)	Oral gavage	60 days		60	d	1.25, 2.5, 5 mg/kg bw	1.25	5	mg/kg		NS			NS	No			No			No
2017	Konstantinova, Victoria; Ibrahim, Mohamed; Lie, Stein A.; Birkeland, Eivind Salmorin; Neppelberg, Evelyn; Marthinussen, Mihaela Cuida; Costea, Daniela Elena; Cimpan, Mihaela R.	Nano-TiO2 penetration of oral mucosa: in vitro analysis using 3D organotypic human buccal mucosa models	10.1111/jop.12469		BACKGROUND: Oral cavity is a doorway for a variety of products containing titanium dioxide (TiO2) nanoparticles (NPs) (nano-TiO2) such as food additives, oral healthcare products and dental materials. Their potential to penetrate and affect normal human oral mucosa is not yet determined. OBJECTIVES: To evaluate the ability of nano-TiO2 to penetrate the in vitro reconstructed normal human buccal m…	Rutile	R	1- spherical, 40 nm 2- spindle-shaped 40x10 nm	25-50 nm	1 - 459.93±18.36 2 - 180.67±2.25	> 100 nm	1 -Americans Elements, Los Angeles, CA, USA 2 - Nanostructured & Amorphous Materials Inc., Garland, TX, USA	Other	1-38 2-165	> 100		NS	Stock suspensions of 5 g/l nano-TiO2 in deionized water were sonicated for 1 min with a 130-Watt ultrasonic processor at 70% duty. Working suspensions were made by adding necessary volumes of culture medium immediately after sonication and rotated for at least 2 min.	SONICATION	NS		NA/NS	-	NA/NS	human normal buccal mucosa	GIT	Oral	Peroral exposure	20 min and 24 hours		1	d	5, 20 and 2000 mg/L	5	2000	mg/L		NS			NS	Yes	Both types of nano-TiO2 were identified by URI within RNHBM epithelium at early (20 min) as well as late (24 h) time points. After 24 h, concentration-dependent differences were observed. Thus, spherical nano-TiO2 showed the deepest location at 5 mg/l concentration, and this was significantly deeper than at 20 and 2000 mg/l (P = 0.006 and P = 0.023, respectively). A significant decrease in the pe…	Positive (+)	No			No
2017	Farrell, T.P.; Magnuson, B.	Absorption, Distribution and Excretion of Four Forms of Titanium Dioxide Pigment in the Rat	10.1111/1750-3841.13791	https://www.scopus.com/inward/record.uri?eid=2-s2.0-85020540393&doi=10.1111%2f1750-3841.13791&partnerID=40&md5=ae3bedc5752645bbe7701a13d0d173ff	Titanium dioxide (TiO2) is a white color additive that has a long history of global approval and use in food. There is, however, considerable confusion regarding the applicability of the biological effects of novel, engineered, nano-sized forms of TiO2 developed for nonpigmentary applications to the safety of oral exposure to food grade TiO2 pigment. The objective of this study was to assess the …	Yes	NS	Yes	NS	Yes	NS	Yes	NS	No	NS	No	NS	NS	NS	NS	4 different forms of food grade TiO2 color pigment in male and female rats.	MICE/RAT		NA/NS		NA/NS	Oral	Peroral exposure	7days		7	d	30 mg TiO2/kg	30	30	mg/kg	titanium content in tissues was	NS			NS	No			No			No
2018	Abu-Dief, E.E.; Abdel-Aziz, H.O.; Nor-Eldin, E.K.; Khalil, K.M.; Ragab, E.E.	Ultrastructural, histochemical and biochemical effects of titanium dioxide nanoparticles on adult male albino rat liver and possible prophylactic effects of milk thistle seeds	10.21608/EJH.2018.7517	https://www.scopus.com/inward/record.uri?eid=2-s2.0-85055701071&doi=10.21608%2fEJH.2018.7517&partnerID=40&md5=ac17f1750f91b5f16627bc9659256fcf	Introduction: Titanium dioxide nanoparticles (Tio2 NPs) are manufactured worldwide in large quantities for use in a wide range of applications. TiO2 NPs proved to damage liver function and induce an oxidative stress attack leading to liver toxicity. Milk thistle is an herbal supplement used to treat liver and biliary disorders. Silymarin, an active ingredient of milk thistle, is a strong antioxid…	-	NS	Yes	NS	No	NS	No	NS	No	NS	No	NS	NS	NS	NS	IP injection	NA/NS	No	NA/NS	No	NA/NS	IP	Intraperitoneal	2weeks		14	d	100-150mg/Kg	100	150	mg/kg		NS			NS	No			No			No
2017	Gato, Worlanyo E.; Hunter, Daniel A.; Byrd, Ian C.; Mays, Christopher A.; Yau, Wilson; Wu, Ji	Assessment of the short-term toxicity of TiO2 nanofiber in Sprague Dawley rats	10.1002/tox.22400		Synthetic nanomaterials have many unique chemical and physical properties, mainly due to their high specific surface area and quantum confinement effect. Specifically, titanium dioxide (TiO2) nanomaterial has high stability, anticorrosive, and photocatalytic properties. However, there are concerns over adverse biological effects resulting from bioeffects. This study was to investigate adverse eff…	-	NS	Yes	NS	No	NS	No	NS	No	NS	No	NS	NS	NS	NS	Oral Rats	MICE/RAT	No	NA/NS	No	NA/NS	Oral	Peroral exposure	2weeks		14	d	40-60 ppm	40	60	mg/kg		NS			NS	No			No			No
2018	El Dine, Fatma Mohamed Magdy Badr; Hussein, Heba Abdel Samie Mohamed; Ghazala, Rasha Abdelmawla	Evaluation of epigenetic changes of liver tissue induced by oral administration of Titanium dioxide nanoparticles and possible protective role of Nigella Sativa oil, in adult male albino rats	10.22038/nmj.2018.05.00002		Objective (s): Titanium dioxide nanoparticles (TiO2 NPs) have been recognized as biologically inert material and have been used in a multitude of applications. Nevertheless, the negative impact on the human health is not yet well understood. Aim of the work: The study attempted to evaluate the epigenetic changes of the genome, in the form of DNA methylation in liver tissue samples, resulting from…	Yes	NS	Yes	NS	No	NS	Yes	NS	No	NS	No	NS	was sonicated for 10 10 min	SONICATION	NS	Albino Rats	MICE/RAT	No	NA/NS	No	NA/NS	oral	Peroral exposure	6 weeks		42	d	100 mg/Kg	100	100	mg/kg		NS			NS	No			No			Yes	MDA/GSH. Depletion of reduced glutathione levels denoting reductive stress and increased lipid peroxidation with high levels of MDA
2014	Shukla, Ritesh K.; Kumar, Ashutosh; Vallabani, Naga Veera Srikanth; Pandey, Alok K.; Dhawan, Alok	Titanium dioxide nanoparticle-induced oxidative stress triggers DNA damage and hepatic injury in mice	10.2217/NNM.13.100		Background: The use of metal oxide nanoparticles (titanium dioxide) in consumer and industrial products improves their quality but also underscores the possible adverse effects to human and environmental health. Materials & methods: Mice were exposed orally for 14 consecutive days and analyzed for alteration in different hepatic enzymes, histopathological changes, oxidative stress, DNA damage, tu…	Yes	NS	Yes	NS	Yes	NS	Yes	NS	No	NS	..-28mV	NEGATIVE	30 W for 20 min (2.5 min pulse on and 1.5 min pulse off).	SONICATION	NS	Mice	MICE/RAT	No	NA/NS	No	NA/NS	oral	Peroral exposure	14 days		14	d	100mg/Kg	100	100	mg/kg		NS			NS	No			No			Yes	GSH/Lipid Peroxidation/ROS
2008	Watari, F.; Abe, S.; Koyama, C.; Yokoyama, A.; Akasaka, T.; Uo, M.; Matsuoka, M.; Totsuka, Y.; Esaki, M.; Morita, M.; Yonezawa, T.	Behavior of in vitro, in vivo and internal motion of micro/nano particles of titanium, titanium oxides and others	10.2109/jcersj2.116.1	https://www.scopus.com/inward/record.uri?eid=2-s2.0-44649148907&doi=10.2109%2fjcersj2.116.1&partnerID=40&md5=e212329d995ced7b91ff61f04115cc24	To clarify the effect of micro/nanosizing of materials onto biological organism, the particle size dependence of reaction of cells and tissue as investigated by both biochemical cell functional test and animal implantation test. Especially for nanoparticles the behavior of invasion and internal diffusion inside body was visualized using an XSAM (X-ray Scanning Analytical Microscope) . The increas…	-	NS	50nm-150micrmeters	50-100 nm; >100 nm	No	NS	Yes	NS	No	NS	No	NS	NS	NS	NS	Rats	MICE/RAT	Human neutrophils	HUMAN - OTHER		NA/NS	oral/respiratory/IV	NA	week	168		h		NS	NS	NS	X-ray sacnning/EDS/SEM	EDS; SEM; X-ray			NS	No			No			No
2015	Khorsandi, L.; Orazizadeh, M.; Mansori, E.; Fakhredini, F.	Glycyrrhizic acid attenuated lipid peroxidation induced by titanium dioxide nanoparticles in rat liver	10.4149/BLL_2015_073		OBJECTIVE: to investigate the hepatoprotective effect of glycyrrhizic acid (GA) against hepatic injury induced by titanium dioxide nanoparticles (NTiO2) in rats. BACKGROUND: Many recent studies demonstrate that most nanoparticles (NPs) have an adverse or toxic action on liver. METHODS: NTiO2- intoxicated rats received 300 mg/kg of NTiO2 for 14 days by gavage method. Protection group was pretreate…	-	NS	<100nm	< 25 nm; 25-50 nm; 50-100 nm	No	NS	No	NS	No	NS	No	NS	10 minutes sonication	SONICATION	NS	Rats	MICE/RAT	No	NA/NS	No	NA/NS	Oral	Peroral exposure	14days		14	d	300mg/Kg	300	300	mg/kg		NS	Blood analysis		NS	No			No			Yes	MDA/SOD/GPx
2019	Zhou, Hualu; Pandya, Janam K.; Tan, Yunbing; Liu, Jinning; Peng, Shengfeng; Mundo, Jorge L. Muriel; He, Lili; Xiao, Hang; McClements, David Julian	Role of Mucin in Behavior of Food-Grade TiO2 Nanoparticles under Simulated Oral Conditions	10.1021/acs.jafc.9b01732		Fine titanium dioxide (TiO2) particles have been used as additives (E171) to modify the optical properties of foods and beverages for many years. Commercial TiO2 additives, however, often contain a significant fraction of nanoparticles (diameter <100 nm), which has led to some concern about their potentially adverse health effects. At present, relatively little is known about how the characterist…	Yes	NS	70-2300nm	50-100 nm; >100 nm	No	NS	Yes	NS	No	NS	-40mV	NEGATIVE	NS	NS	NS		NA/NS		NA/NS		NA/NS		NA						NS	NS	NS		NS			NS	No			No			No
2018	Zhang, Lu; Xie, Xingxing; Zhou, Yigang; Yu, Dainan; Deng, Yu; Ouyang, Jiexiu; Yang, Bei; Luo, Dan; Zhang, Dalei; Kuang, Haibin	Gestational exposure to titanium dioxide nanoparticles impairs the placentation through dysregulation of vascularization, proliferation and apoptosis in mice	10.2147/IJN.S152400		Background: Titanium dioxide nanoparticles (TiO2 NPs) have recently found applications in a wide variety of consumer goods. TiO2 NPs exposure significantly increases fetal deformities and mortality. However, the potential toxicity of TiO2 NPs on the growth and development of placenta has been rarely studied during mice pregnancy. Purpose: The objective of this study was to investigate the effects…	-	NS	25nm	< 25 nm		NS		NS	44-55 m2/g	< 50; 50-100	No	NS	ultrasonically for 20–30 min and then mechanically vibrated for 3–5 min.	SONICATION	NS	Mice	MICE/RAT	No	NA/NS	No	NA/NS	Oral	Peroral exposure	13 days		13	d	1-10 mg/Kg/day	1	10	mg/kg/day		NS	Apoptosis/gene expression		NS	No			No			No
2019	Chen, Zhangjian; Zhou, Di; Wang, Yun; Zhao, Lin; Hu, Guiping; Liu, Jiaxing; Feng, Huimin; Long, Changmao; Yan, Tenglong; Zhou, Shupei; Jia, Guang	Combined effect of titanium dioxide nanoparticles and glucose on the cardiovascular system in young rats after oral administration	10.1002/jat.3750		Titanium dioxide nanoparticles (TiO2 NPs) have already been used as food additive in various products and are usually consumed with a considerable amount of sugar. Oral consumption of TiO2 NPs poses concerning health risks; however, research on the combined effect of ingested TiO2 NPs and glucose is limited. We examined young Sprague-Dawley rats administrated TiO2 NPs orally at doses of 0, 2, 10 …	-	NS	24 nm	< 25 nm	No	NS	Yes	NS	63.95 m2/g	50-100	No	NS	15 minutes ultrasonic	SONICATION	NS	Rats	MICE/RAT		NA/NS		NA/NS	oral	Peroral exposure	30-days		30	d	0-50 mg/Kg	2	50	mg/kg/day		NS	Parameters related to cardiac damage		NS	No			No			No
2019	Cao, Xiaoqiong; DeLoid, Glen M.; Bitounis, Dimitrios; De La Torre-Roche, Roberto; White, Jason C.; Zhang, Zhenyuan; Ho, Chin Guan; Ng, Kee Woei; Eitzer, Brian D.; Demokritou, Philip	Co-exposure to the food additives SiO2 (E551) or TiO2 (E171) and the pesticide boscalid increases cytotoxicity and bioavailability of the pesticide in a tri-culture small intestinal epithelium model: potential health implications	10.1039/c9en00676a		Many toxicity investigations have evaluated the potential health risks of ingested engineered nanomaterials (iENMs); however, few have addressed the potential combined effects of iENMs and other toxic compounds (e.g. pesticides) in food. To address this knowledge gap, we investigated the effects of two widely used, partly nanoscale, engineered particulate food additives, TiO2 (E171) and SiO2 (E55…	-	A	113.4nm	> 100 nm		NS	Yes	NS		NS	-30mV	NEGATIVE	NS	NS	NS		NA/NS	Co-culture CACO-2/HT29-MTX/RAJIB	NA/NS		NA/NS		NA						NS	NS	NS		NS			NS	No			No			Yes	ROS
2017	Ansari, Mahalakshmi; Kurian, Gino A.	Differential effect of aqueous Desmodium gangeticum root extract mediated TiO2 nanoparticles on isolated mitochondria, cells and Wistar rats	10.1016/j.apjtb.2017.09.020		Objective: To study the renal toxic effect of titanium dioxide nanoparticles (TiNPs) prepared by chemical and green route. Methods: TiNPs were prepared by chemical (sol gel technique) and green route (using aqueous extract of Desmodium gangeticam root by using titanium tetraisopropoxide as precursor). Thus prepared TiNPs were characterized using UV visible spectrophotometry, X-ray diffractometry …	-	NS	2.59nm	< 25 nm		NS	Yes	NS		NS		NS	NS	NS	NS	Rats	MICE/RAT	LLC-PK1 cells	MURINE - OTHER		NA/NS	IP	Intraperitoneal	24h		1	d	100mg/Kg	100	100	mg/kg		NS	Tissue and blood analysis		NS	No			No			Yes	ROS
2017	Canli, Esin G.; Atli, Guluzar; Canli, Mustafa	Response of the antioxidant enzymes of the erythrocyte and alterations in the serum biomarkers in rats following oral administration of nanoparticles	10.1016/j.etap.2017.02.007		In this study, Al2O3, CuO and TiO2 nanoparticles (NPs) were administered to mature female rats (Rattus norvegicus var. albinos) via oral gavage (0, 0.5, 5, 50 mg/kg b.w./day) for 14 days to investigate their effects on 14 serum biomarkers and 4 antioxidant enzyme (catalase, superoxide dismutase, glutathione peroxidase, glutathione S-transferase) activities in the erythrocyte. Data showed that Al2…	-	NS	>31nm	25-50 nm; 50-100 nm		NS	Yes	NS	>30m2/g	< 50		NS	NS	NS	NS	Rats	MICE/RAT		NA/NS		NA/NS	Oral	Peroral exposure	14days		14	d	0,0.5, 5, 50 mg/kg b.w./day).	0.5	50	mg/kg/day		NS	Blood 7serum analysis		NS	No			No			Yes	CAT/SOD/GPX/GST/GSH
2018	Modrzynska, Justyna; Berthing, Trine; Ravn-Haren, Gitte; Kling, Kirsten; Mortensen, Alicja; Rasmussen, Rie R.; Larsen, Erik H.; Saber, Anne T.; Vogel, Ulla; Loeschner, Katrin	In vivo-induced size transformation of cerium oxide nanoparticles in both lung and liver does not affect long-term hepatic accumulation following pulmonary exposure	10.1371/journal.pone.0202477		Recent findings show that cerium oxide (CeO2) nanoparticles may undergo in vivo-induced size transformation with the formation of smaller particles that could result in a higher translocation following pulmonary exposure compared to virtually insoluble particles, like titanium dioxide (TiO2). Therefore, we compared liver deposition of CeO2 and TiO2 nanoparticles of similar primary sizes 1, 28 or …	rutile	R	68 nm,	50-100 nm	125.9 nm	> 100 nm	Yes	NS	139.1 m2/g	> 100		NS	were sonicated for 15 min on ice, using a probe sonicator operating at 100 W/22.5 kHz	SONICATION	NS	Mice	MICE/RAT		NA/NS		NA/NS	Oral/IV/IP/IT	Oral gavage; Intraperitoneal	180 days		180	d	126 micrograms	NS	NS	NS		NS	Tissue analysis		NS	No			No			No
2014	Tay, Chor Yong; Fang, Wanru; Setyawati, Magdiel Inggrid; Chia, Sing Ling; Tan, Kai Soo; Hong, Catherine Hsu Ling; Leong, David Tai	Nano-hydroxyapatite and Nano-titanium Dioxide Exhibit Different Subcellular Distribution and Apoptotic Profile in Human Oral Epithelium	10.1021/am501266a		Nanomaterials (NMs) such as titanium dioxide (nano-TiO2) and hydroxyapatite (nano-HA) are widely used in food, personal care, and many household products. Due to their extensive usage, the risk of human exposure is increased and may trigger NMs specific biological outcomes as the NMs interface with the cells. However, the interaction of nano-TiO2 and nano-HA with cells, their uptake and subcellul…	-	NS	24.0 ± 7.2 nm	< 25 nm	after dispersion in serum containing DMEM/F12 biological medium, NMs formed agglomerates of a hydrodynamic diameter in the range of 280−310 nm	> 100 nm	AEROXIDE P25 from Evonik Degussa, U.S.A.	Evonik	?	NS	negative ζ-potential of −7.95 ± 0.76 mV,	NEGATIVE	Probe sonication (Micron TM XL 2000, Qsonica) for 30 sec, then resuspended in ethanol (50 μg/mL)	SONICATION	Stock solution of 125 mM in ultrapure water, sonication before diluting in the various desired dispersants. ethanol (50 μg/mL	no	NA/NS	human oral buccal epithelial cells	HUMAN - OTHER	no	NA/NS	cell medium	NA	12 h	24h		h	62-1250 uM	62	1250	µM	TEM	TEM		after dispersion in serum containing DMEM/F12 biological medium, NMs formed agglomerates of a hydrodynamic diameter in the range of 280−310 nm	100 - 500	yes	(FITC) green fluorescent dye was covalently FITC conjugation onto nano-TiO2 using APTES to couple the −NH2 group of APTES molecules and the −NCS group of the FITC molecule	Positive (+)	No			Yes	ROS production
2014	Tassinari, Roberta; Cubadda, Francesco; Moracci, Gabriele; Aureli, Federica; D'Amato, Marilena; Valeri, Mauro; De Berardis, Barbara; Raggi, Andrea; Mantovani, Alberto; Passeri, Daniele; Rossi, Marco; Maranghi, Francesca	Oral, short-term exposure to titanium dioxide nanoparticles in Sprague-Dawley rat: focus on reproductive and endocrine systems and spleen	10.3109/17435390.2013.822114		The study explored possible reproductive and endocrine effects of short-term (5 days) oral exposure to anatase TiO2 nanoparticles (0, 1, 2 mg/kg body weight per day) in rat. Nanoparticles were characterised by scanning electron microscopy (SEM) and transmission electron microscopy, and their presence in spleen, a target organ for bioaccumulation, was investigated by single-particle inductively co…	anatase	A	<25 nm by SEM & TEM (two different morphologies: spherules with primary size ranging from 20 to 60 nm and particles with irregular shape ranging from 40 to 60 nm.	< 25 nm	average diameter of the size distribution was 284 ± 43 nm	> 100 nm	Sigma-Aldrich	Sigma	45–55 m2/g	< 50; 50-100	?	NS	probe sonicator	SONICATION	suspensions (1 ml) were filtered through 0.05-mm-pore polycarbonate membranes	rat organs after oral exposure to 0, 1, 2 mg/kg body weight per day: thyroid, spleen, adrenal medulla, adrenal cortex (females) and ovarian granulosa	MICE/RAT - BONE MARROW/SPLEEN/THYROID/BRAIN/OVARY	no	NA/NS	no	NA/NS	oral	Peroral exposure	5 days		5	d	0, 1, 2 mg/kg body weight per day	1	2	mg/kg/day	SEM, TEM	SEM; TEM		mostly agglomerates of 1.6 mm, 13% below 100 nm, 87 % from 30 to 900 nm, 48% from 100 to 300 nm	< 100; 100 - 500; 500 - 1000; > 1000	No			No			No
2017	Grissa, Intissar; Ezzi, Lobna; Chakroun, Sana; Mabrouk, Abir; Ben Saleh, Azer; Braham, Hamadi; Haouas, Zohra; Ben Cheikh, Hassen	Rosmarinus officinalis L. ameliorates titanium dioxide nanoparticles and induced some toxic effects in rats' blood	10.1007/s11356-017-8848-1		Titanium dioxide nanoparticles (TiO2 NPs) have been widely used as a white pigment in food and drugs. The most important route of human exposure to TiO2 is through food and drug products containing TiO2 additives. This study investigates the efficacy of an oral traditional use of rosemary extract in ameliorating some toxic effects induced on blood of TiO2 NP-intoxicated rats. Rats were given rose…	anatase )commercial additive E171)	A	5-10 nm	< 25 nm	?	NS	AZ tech (Italy)	Other	?	NS	?	NS	sonication 30 min plus mechanically vibrated for 5 min before every use.	SONICATION	NS	rat blood and PBLs	MICE/RAT - BLOOD	no	NA/NS	no	NA/NS	intragastric administration	Oral gavage	60 days		60	d	100 mg/kg/day	100	100	mg/kg/day	?	NS		?	NS	No			No			yes	SOD, CAT, and anrtioxidant levels)
2016	Donner, E. M.; Myhre, A.; Brown, S. C.; Boatman, R.; Warheit, D. B.	In vivo micronucleus studies with 6 titanium dioxide materials (3 pigment-grade & 3 nanoscale) in orally-exposed rats	10.1016/j.yrtph.2015.11.003		Six pigment-grade (pg) or ultrafine (uf)/nanoscale (anatase and/or rutile) titanium dioxide (TiO2) particulates were evaluated for in vivo genotoxicity (OECD 474 Guidelines) in male and female rats by two different laboratories. All test materials were robustly characterized. The BET surface areas of the pg and uf samples ranged from 7 to 17 m(2)/g and 50 to 82 m(2)/g respectively. The materials …	6 anatase or rutile NPs tested (see pdf# 431)	A; R; M	40-210 nm	25-50 nm; 50-100 nm; >100 nm	?	NS	?	NS	?	NS	?	NS	NS	NS	mixture of anatase and rutile crystallites or ultrafine and pigmentary materials composed of either rutile or anatase	rat, peripheral blood reticulocytes	MICE/RAT - BLOOD	no	NA/NS	no	NA/NS	oral	Peroral exposure	2-3 days		3	d	500- 2000 mg/kg	500	2000	mg/kg		NS			NS	No			No			No
2017	Huang, Chao; Sun, Mayu; Yang, Yang; Wang, Feng; Ma, Xueqi; Li, Jingquan; Wang, Yilong; Ding, Qiurong; Ying, Hao; Song, Haiyun; Wu, Yongning; Jiang, Yiguo; Jia, Xudong; Ba, Qian; Wang, Hui	Titanium dioxide nanoparticles prime a specific activation state of macrophages	10.1080/17435390.2017.1349202		Titanium dioxide nanoparticles (TiO2 NPs) are widely used in foods, cosmetics, and medicine. Although the inhalation toxicity of TiO2 NPs has been studied, the potential adverse effects of oral exposure of low-dose TiO2 NPs are largely unclear. Herein, with macrophage cell lines, primary cells, and mouse models, we show that TiO2 NPs prime macrophages into a specific activation state characterize…	anatase	A	10 and 50 nm	< 25 nm; 25-50 nm	202.5 and 427 nm	> 100 nm	DK Nanotechnology, China	Other		NS	-11.6 and -11.8 mV	NEGATIVE	sonication 20 min	SONICATION	NS	C57BL/6 mice, Bone marrow-derived macrophages	MICE/RAT - BONE MARROW	yes, Raw264.7 and J774a.1 macrophage cell lines	MURINE - OTHER	no	NA/NS	oral	Peroral exposure	1 month		30	d	0.1% TiO2 NPs in diet; 0.1, 1, or 10 lg/mL in culture medium	0.1	10	µg/mL	?	NS		?	NS	No			No			No
2015	Farcal, L.; And√≥n, F.T.; Di Cristo, L.; Rotoli, B.M.; Bussolati, O.; Bergamaschi, E.; Mech, A.; Hartmann, N.B.; Rasmussen, K.; Riego-Sintes, J.; Ponti, J.; Kinsner-Ovaskainen, A.; Rossi, F.; Oomen, A.; Bos, P.; Chen, R.; Bai, R.; Chen, C.; Rocks, L.; Fulton, N.; Ross, B.; Hutchison, G.; Tran, L.; Mues, S.; Ossig, R.; Schnekenburger, J.; Campagnolo, L.; Vecchione, L.; Pietroiusti, A.; Fadeel, B.	Comprehensive in vitro toxicity testing of a panel of representative oxide nanomaterials: First steps towards an intelligent testing strategy	10.1371/journal.pone.0127174	https://www.scopus.com/inward/record.uri?eid=2-s2.0-84930653106&doi=10.1371%2fjournal.pone.0127174&partnerID=40&md5=9d75b4fbe1d7a847bf657940247579cf	Nanomaterials (NMs) display many unique and useful physico-chemical properties. However, reliable approaches are needed for risk assessment of NMs. The present study was performed in the FP7-MARINA project, with the objective to identify and evaluate in vitro test methods for toxicity assessment in order to facilitate the development of an intelligent testing strategy (ITS). Six representative ox…	rutile; hydrophilic (NM-103) and hydrophobic (NM-104)	R	22–26 nm ± 10 nm	< 25 nm; 50-100 nm	?	NS	JRC Repository	JRC	51 m2/g (NM-103) or 56 m2/g (NM-104)	50-100	?	NS	NS	NS	impurities detected by Energy Dispersive X-Ray Spectroscopy are Al, Si, Fe and S	no	NA/NS	macrophages (MH-S, HMDM, RAW-264.7), respiratory (Calu-3,16HBE, RLE-6TN), gastrointestinal (Caco-2), reproductive (mouse TM3 Leydig, TM4 Sertoli), kidney (NRK-52E, embryonic (NIH3T3, mES)	HUMAN - Caco-2, OTHERS	no	NA/NS	cell medium	NA	24-72h	72		h	0.125 and 200 μg/ml	0.125	200	µg/mL	TEM	TEM		aggregates in the size range of 20–500 nm	< 100; 100 - 500	No			yes	TEER	Positive	yes	ROS production
2015	Chen, Zhangjian; Wang, Yun; Zhuo, Lin; Chen, Shi; Zhao, Lin; Chen, Tian; Li, Yang; Zhang, Wenxiao; Gao, Xin; Li, Ping; Wang, Haifang; Jia, Guang	Interaction of titanium dioxide nanoparticles with glucose on young rats after oral administration	10.1016/j.nano.2015.06.002		Titanium dioxide nanoparticles (TiO2 NPs) have a broad application prospect in replace with TiO2 used as a food additive, especially used in sweets. Understanding the interaction of TiO2 NPs with sugar is meaningful for health promotion. We used a young animal model to study the toxicological effect of orally administrated TiO2 NPs at doses of 0, 2, 10 and 50 mg/kg per day with or without daily c…	anatase	A	24 ± 5 nm	< 25 nm	?	NS	Shanghai Aladdin Reagent, China	Aladdin	64 m2/g	50-100	+11 to -13 mV depending on presence of gastric or intestinal juice, or glucose	NEGATIVE; POSITIVE	vortex	OTHER	polydispersion index of 0,337	young rats, liver kidney, heart, testis/ovary, blood cells	MICE/RAT - LIVER/SPLEEN/KIDNEY/ HEART/BLOOD/TESTIS/OVARY	no	NA/NS	no	NA/NS	oral	Peroral exposure	30-90 d		90	d	2-50 mg/kg/day	2	50	mg/kg/day	TEM	TEM		50-200 nm with aggregation, which increased in the presence of glucose	< 100; 100 - 500	No			No			No
2015	Azim, Samy A. Abdel; Darwish, Hebatallah A.; Rizk, Maha Z.; Ali, Sanaa A.; Kadry, Mai O.	Amelioration of titanium dioxide nanoparticles-induced liver injury in mice: Possible role of some antioxidants	10.1016/j.etp.2015.02.001		This study investigates the efficacy of idebenone, camosine and vitamin E in ameliorating some of the biochemical indices induced in the liver of titanium dioxide nanoparticles (TiO2 NPs) intoxicated mice. Nano-anatase TiO2 (21 nm) was administered (150 mg/kg/day) for 2 weeks followed by the aforementioned antioxidants either alone or in combination for 1 month. TiO2 NPs significantly increased s…	anatase	A	21 nm	< 25 nm	?	NS	Sigma-Aldrich	Sigma	?	NS	?	NS	sonication for 15 min.	SONICATION	NPs suspended in 1% Tween 80	mouse liver	MICE/RAT - LIVER	no	NA/NS	no	NA/NS	oral	Peroral exposure	14 d		14	d	150 mg/kg/day	150	150	mg/kg/day	?	NS		?	NS	No			No			yes	MDA levels, GSH levels i; Nrf2 mRNA levels
2016	Nejad, S. Moosavi; Takahashi, Hiromasa; Hosseini, Hamid; Watanabe, Akiko; Endo, Hitomi; Narihira, Kyoichi; Kikuta, Toshihiro; Tachibana, Katsuro	Acute effects of sono-activated photocatalytic titanium dioxide nanoparticles on oral squamous cell carcinoma	10.1016/j.ultsonch.2016.02.026		Sonodynamic therapy (SDT) is a new treatment modality using ultrasound to activate certain chemical sensitizers for cancer therapy. In this study, effects of high intensity focused ultrasound (HIFU) combined with photocatalytic titanium dioxide (TiO2) nanoparticles on human oral squamous cell line HSC-2 were investigated. Viability of HSC-2 cells after 0, 0.1, 1, or 3 s of HIFU irradiation with 2…	anatase-titania-silica-H2O2 complex	A	10–30 nm	< 25 nm; 25-50 nm	?	NS	Asaka Riken Co., Fukushima	Other	?	NS	?	NS	NS	NS	maximum of 0.1% peroxide per solid weight	BALB/c athymic nude mice	MICE/RAT	oral squamos cell line HSC-2	MURINE - OTHER	no	NA/NS	cell medium or	NA	?	NS		h	0.01-0.06% (v/v) anatase-silica with HSC-2;	0.01	0.06	% (v/v)	?	NS		no aggregation	< 100	yes		Positive (+)	No			No
2014	Faust, James J.; Doudrick, Kyle; Yang, Yu; Westerhoff, Paul; Capco, David G.	Food grade titanium dioxide disrupts intestinal brush border microvilli in vitro independent of sedimentation	10.1007/s10565-014-9278-1		Bulk-and nano-scale titanium dioxide (TiO2) has found use in human food products for controlling color, texture, and moisture. Once ingested, and because of their small size, nano-scale TiO2 can interact with a number of epithelia that line the human gastrointestinal tract. One such epithelium responsible for nutrient absorption is the small intestine, whose constituent cells contain microvilli t…	anatase	A	E171: 122±48 nm (51 to 290 nm) candy: 141±56 nm (48.5 to 305 nm)	50-100 nm; >100 nm	E171: 220±9 nm (polydispersity=0.130±0.013) and 336±6 nm in culture medium;candy: 250±10 nm (polydispersity=0.165±0.014) nd 365±5 nm in culture medium;	> 100 nm	E171 additive (China) and candy-extracted TiO2	Other	?	NS	?	NS	sonication for 2 min	SONICATION	food grade E171 and cancdy TiO2 are colloidal scale and have spherical to a slightly longer aspect ratio geometry	no	NA/NS	polarized Caco-2 BBe1	HUMAN - CACO-2	no	NA/NS	culture medium	NA	24 h	24		h	350 ng/mL which is equal to 100 ng/cm2	350	350	ng/mL		NS		mostly aggregates, but 100 nm primary particle size present	< 100	yes		Positive (+)	No			No
2014	Botelho, Monica Catarina; Costa, Carla; Silva, Susana; Costa, Solange; Dhawan, Alok; Oliveira, Paula A.; Teixeira, Joao P.	Effects of titanium dioxide nanoparticles in human gastric epithelial cells in vitro	10.1016/j.biopha.2013.08.006		Manufacturing or using nanomaterials may result in exposure of workers to nanoparticles. Potential routes of exposure include skin, lung and gastrointestinal tract. The lack of health-based standards for nanomaterials combined with their increasing use in many different workplaces and products emphasize the need for a reliable temporary risk assessment tool. Therefore, the aim of this work was to…	Aeroxide P25 (80/20 anatase/rutile) or oxideanatase	M	21 nm	< 25 nm	Sigma (A. P25): 420.7 nm, Degussa: 160.5 nm	> 100 nm	Degussa and Sigma	Evonik	?	NS	Sigma: - 9.96 mV; Degussa: -27.8 mV	NEGATIVE	sonication for 5 min	SONICATION	NS	no	NA/NS	AGS human gastric epithelial	NA/NS	no	NA/NS	PBS/BSA instead of FBS-culture medium	NA	3, 6, or 24h	24		h	150 mg/mL	150	150	mg/mL	?	NS		RPMI/FBS led to protein-coated NPs that had no lonher any effect on cell proliferation	NS	No			No			yes	GSSG
2018	Jensen, D.M.; Christophersen, D.V.; Sheykhzade, M.; Skovsted, G.F.; Lykkesfeldt, J.; M√ºnter, R.; Roursgaard, M.; Loft, S.; M√∏ller, P.	Vasomotor function in rat arteries after ex vivo and intragastric exposure to food-grade titanium dioxide and vegetable carbon particles	10.1186/s12989-018-0248-2	https://www.scopus.com/inward/record.uri?eid=2-s2.0-85042525245&doi=10.1186%2fs12989-018-0248-2&partnerID=40&md5=54f92aaa3b6eb47459a9f640a9b2e810	Background: Humans are continuously exposed to particles in the gastrointestinal tract. Exposure may occur directly through ingestion of particles via food or indirectly by removal of inhaled material from the airways by the mucociliary clearance system. We examined the effects of food-grade particle exposure on vasomotor function and systemic oxidative stress in an ex vivo study and intragastric…	Food-grade TiO2 E171 or Aeroxide P25	M	21	< 25 nm	E171: 203 ± 75 nm in DMEM and 270 ± 25 nm in filtered water; Aeroxide P25: 50% particles were below 100 nm.	> 100 nm	food website or Sigma	Sigma	A P25: 46 m2/g ; E171: 7.9 m2/g	< 50	E171: − 37.2 ± 2.0 mV	NEGATIVE	sonication for 16 min	SONICATION	particle sizes in dry form: 135 ± 46 nm, 305 ± 61, 900 ± 247 nm	rats; Sprague-Dawley rats or female lean Zucker rats	MICE/RAT	ex-vivo aorta rings prepared from Sprague-Dawley rats	MURINE - OTHER	no	NA/NS	oral	Peroral exposure	aorta rings: 30 min		0.02	d	50 - 500 mg/kg bw/week; aorta rings: 14 μg/ml and 140 μg/ml E171 or A P25	50	500	mg/kg/week	TEM after suspension in water with 2% FBS at 100 μg/ml	TEM		?	NS	No			No			yes
2019	Gandamalla, Durgaiah; Lingabathula, Harikiran; Yellu, Narsimhareddy	Nano titanium exposure induces dose- and size-dependent cytotoxicity on human epithelial lung and colon cells	10.1080/01480545.2018.1452930		The productions as well as use of Titanium dioxide nanoparticles (TNPs) were rapidly increasing in the present nano-world. The TNP becomes an inevitable part our daily life in the form of cosmeceutical, bio-medical, and nano-pharmaceutical applications. The TNPs are either inhaled or ingested into the human body through common routes of exposure like the lungs and the oral-gastrointestinal tract …	TNP 18, TNP 30, and TNP 87 (80/20 anatase/rutile)	M	TNP 18- 15.84 ± 6.59; TNP 30- 24.59 ± 8.60; TNP 87- 81.80 ± 5.27	< 25 nm; 25-50 nm; 50-100 nm	TNP 18- 124 ± 12;TNP 30- 172 ± 2.9 ;TNP 87- 486 ± 37	> 100 nm	Sigma	Sigma	TNP 18- 48.73; TNP 30- 23.39; TNP 87- 11.60	< 50	TNP 18-'- 43.29; TNP 30- '- 14.25; TNP 87- '-8.6	NEGATIVE	sonication for 10 min	SONICATION	spherical	no	NA/NS	human epithelial lung A549 and Caco-2 colon cells	HUMAN - CACO-2/A549	no	NA/NS	culture medium	NA	48 h	48		h	0.1–100 lg/ml	0.1	100	µg/mL	TEM	TEM		different sizes of agglomerates with varying sizes	NS	No			No			yes
2015	Warheit, D. B.; Boatman, R.; Brown, S. C.	Developmental toxicity studies with 6 forms of titanium dioxide test materials (3 pigment-different grade & 3 nanoscale) demonstrate an absence of effects in orally-exposed rats	10.1016/j.yrtph.2015.09.032		Six different commercial forms and sizes of titanium dioxide particles were tested in separate developmental toxicity assays. The three pigment-grade (pg) or 3 ultrafine (uf)/nanoscale (anatase and/or rutile) titanium dioxide (TiO2) particle-types were evaluated for potential maternal and developmental toxicity in pregnant rats by two different laboratories. All studies were conducted according t…	6 anatase or rutile NPs tested (see pdf# 412)	A; R	range of 20-206 nm	< 25 nm; 25-50 nm; 50-100 nm; >100 nm	?	NS	?	NS	range of 7-82 m2/g	< 50; 50-100	?	NS	sonication for 3 h	SONICATION	same NPs as pdf# 412: mixture of anatase and rutile crystallites or ultrafine and pigmentary materials composed of either rutile or anatase	Sprague-Dawley as well as pregnant Wistar rats, body weight and food consumption and offspring	MICE/RAT	no	NA/NS	no	NA/NS	oral	Peroral exposure	14 days during gestation		14	d	100-1000 mg/kg	100	1000	mg/kg	TEM	TEM		ultrafine NPs predominantly agglomerated, whereas pigmentary materials were better dispersed.	NS	No			No			No
2018	Jalili, Pegah; Gueniche, Nelly; Lanceleur, Rachelle; Burel, Agnes; Lavault, Marie-Therese; Sieg, Holger; Boehmert, Linda; Meyer, Thomas; Krause, Benjamin-Christoph; Lampen, Alfonso; Estrela-Lopis, Irina; Laux, Peter; Luch, Andreas; Hogeveen, Kevin; Fessard, Valerie	Investigation of the in vitro genotoxicity of two rutile TiO2 nanomaterials in human intestinal and hepatic cells and evaluation of their interference with toxicity assays	10.1016/j.impact.2018.02.004		TiO2 nanomaterials (NM) have a wide range of industrial applications, including their use in food products. The incorporation of these NMs in consumer products represents a clear concern for public health safety agencies and consumers, and further investigation of the potential impact of these products on human health is necessary. Indeed, since human oral exposure to TiO2 NMs is expected to incr…	rutile; hydrophilic (NM-103) and hydrophobic (NM-104)	R	25 nm	25-50 nm	235 -270 nm in medium	> 100 nm	JRC-IHCP, Ispra, Italy	JRC	NM103: 51 m2/g NM104: 52/56 m2/g	50-100	-15.5-15.8 mV in medium	NEGATIVE	sonication for 16 min	SONICATION	Al-coated NPs; agglomerate size was 113 ± 6 nm and 122 ± 8 nm for NM103 and NM104	no	NA/NS	intestinal Caco-2 and hepatic HepaRG cells	HUMAN - CACO-2/HEPARG	no	NA/NS		NA	3 or 24 h	24		h	1.2 to 80 μg/cm2 = 4-256 μg/ml	4	256	µg/mL		NS			NS	yes	TEM	Positive (+)	No			yes	GSH, CellROX
2016	Hendrickson, Olga D.; Pridvorova, Svetlana M.; Zherdev, Anatoly V.; Klochkov, Sergey G.; Novikova, Oksana V.; Shevtsova, Elena F.; Bachurin, Sergey O.; Dzantiev, Boris B.	Size-Dependent Differences in Biodistribution of Titanium Dioxide Nanoparticles After Sub-Acute Intragastric Administrations to Rats	10.2174/1573413711666151008013943		Background: The human and environmental exposure to titanium dioxide is currently large-scale. Taking into account that for TiO2 the peroral route of exposure seems to be a very important route of exposure for humans, knowledge of its biodistribution and toxicity after the peroral uptake, is highly relevant for the human health risk assessment of TiO2 NPs. The present study compares the biodistri…	anatase	A	less than 25 nm	< 25 nm		NS	NM101: JRC; NP25: Sigma Aldrich, USA	JRC	NM101: 320; NP25:45-55	> 100		NS	Ultrasonication during 5 min, together with 0,1%Tween-80	SONICATION	tem observation.	male rats	MICE/RAT		NA/NS		NA/NS	intragastrically administered	Oral gavage	28-day		28	d	250 mg/Kg body weight	250	250	mg/kg		NS		Dispersion in aquous medium increases the aggegation of particles with more than 100nm	< 100	No			Yes		Positive	No
2017	Hong, Fashui; Zhou, Yingjun; Zhao, Xiaoyang; Sheng, Lei; Wang, Ling	Maternal exposure to nanosized titanium dioxide suppresses embryonic development in mice	10.2147/IJN.S143598		Although nanoscale titanium dioxide (nano-TiO2) has been extensively used in industrial food applications and daily products for pregnant women, infants, and children, its potential toxicity on fetal development has been rarely studied. The main objective of this investigation was to establish the effects of maternal exposure of nano-TiO2 on developing embryos. Female imprinting control region mi…	anatase	A	6.5 nm	< 25 nm	294 nm	> 100 nm	controlled hydrolysis of titanium tetrabutoxide	Other	174.8 m2/g	> 100	7.57 mV	POSITIVE	sonication for 15–20 min	SONICATION	NS	pregnant CD1 mice; maternal serum and weight gain; fetal size, skeleton and viability	MICE/RAT	no	NA/NS	no	NA/NS	oral	Peroral exposure	gestational day 0 to 17		17	d	25-100 mg/kg	25	100	mg/kg	?	NS		?	NS	No			yes	cross placental barrier into fetus	Positive	No
2014	Garcia-Contreras, Rene; Scougall-Vilchis, Rogelio J.; Contreras-Bulnes, Rosalia; Kanda, Yumiko; Nakajima, Hiroshi; Sakagami, Hiroshi	Induction of Prostaglandin E-2 Production by TiO2 Nanoparticles in Human Gingival Fibroblast			Background: Despite recent progress in the research of nanoparticles (NPs) spanning in many scientific fields, study of NPs in dentistry is limited. This triggered us to investigate the effect of TiO2 NPs on the drug-sensitivity of oral squamous cell carcinoma and inflammation of human gingival fibroblasts (HGFs). Materials and Methods: The number of viable HGF cells was determined by 3-(4,5-dime…	anatase	A	<25 nm	< 25 nm	?	NS	Sigma_Aldrich	Sigma	?	NS	?	NS	sonication	SONICATION	NS	no	NA/NS	Human Gingival Fibroblast from extracted tooth of one patient	HUMAN - OTHER	no	NA/NS	culture medium	NA	3h	3		h	0-3.2 mM	0.05	3.2	mM	TEM	TEM		?	NS	yes	TEM	Positive (+)	No			No
2015	Hu, Hailong; Guo, Qian; Wang, Changlin; Ma, Xiao; He, Hongjuan; Oh, Yuri; Feng, Yujie; Wu, Qiong; Gu, Ning	Titanium dioxide nanoparticles increase plasma glucose via reactive oxygen species-induced insulin resistance in mice	10.1002/jat.3150		There have been few reports about the possible toxic effects of titanium dioxide (TiO2) nanoparticles on the endocrine system. We explored the endocrine effects of oral administration to mice of anatase TiO2 nanoparticles (0, 64 and 320 mg kg(-1) body weight per day to control, low-dose and high-dose groups, respectively, 7 days per week for 14 weeks). TiO2 nanoparticles were characterized by sca…	anatase	A	15	< 25 nm	49.59 ± 0.41 (PBS)	25-50 nm	Veking Co., Ltd. (Hangzhou, China)	Other		NS	-24.51±3.92	NEGATIVE	NS	NS	Size (TEM/SEM): 25.64 ± 6.63 nm; Shape by TEM and SEM, but not described, just an image	Six-week-old CD-1 (ICR) mice of males	MICE/RAT		NA/NS		NA/NS	oral	Peroral exposure	7 days per week for 14 weeks		98	d	0.52, 2.6, 13, 64, and 320 mg/kg	0.52	320	mg/kg	TEM, SEM	SEM; TEM			NS	No			No			yes	Levels of total SOD, GSH and MDA
2015	Filippi, Celine; Pryde, Anne; Cowan, Pauline; Lee, Tricia; Hayes, Peter; Donaldson, Ken; Plevris, John; Stone, Vicki	Toxicology of ZnO and TiO2 nanoparticles on hepatocytes: Impact on metabolism and bioenergetics	10.3109/17435390.2014.895437		Background and aim: Zinc oxide (ZnO) and titanium dioxide (TiO2) nanomaterials (NMs) are used in many consumer products, including foodstuffs. Ingested and inhaled NM can reach the liver. Whilst their effects on inflammation, cytotoxicity, genotoxicity and mitochondrial function have been explored, no work has been reported on their impact on liver intermediary metabolism. Our aim was to assess t…	rutile	R	30.5±1.8	25-50 nm	119±16	> 100 nm	Amorphous Materials Inc., Houston, TX	Other	27.5	< 50	9.2±0.1 (acidic)/–5.6±0.3(serum)	NEGATIVE; POSITIVE	suspended at 1 mg/ml in phosphate buffered saline (Sigma) and sonicated in a waterbath sonicator without pause for 16 min at 25 C	SONICATION	NS		NA/NS	C3A cell	HUMAN - OTHER		NA/NS		NA	4h				and 10 lg/cm2,	10	10	µg/cm2		NS		liver metabolism, mitocondrial potential, RNA isolation, qRT-PCR	NS	No			No			yes	ROS(DHE)
2015	Teubl, Birgit Johanna; Leitinger, Gerd; Schneider, Marc; Lehr, Claus-Michael; Froehlich, Eleonore; Zimmer, Andreas; Roblegg, Eva	The buccal mucosa as a route for TiO2 nanoparticle uptake	10.3109/17435390.2014.921343		The oral cavity, although part of the aero-digestive tract, is still neglected in terms of risk assessment with respect to nanoparticle uptake. If nanoparticles enter the oral cavity, either via oral products or inhaled materials, it is not clear whether they rapidly interact with the mucosae or are swallowed. In this study, interactions of three distinct titanium dioxide (TiO2) particles (i. e. …	anatase, Rutile, Anatase (80%) and rutile (20%)	A; M	NM 100-size not provided; NM101 (7 nm); NM105 (22 nm)	< 25 nm	S1	NS	Provided by Organization for Economic co-Operation; manufactures: TIONA (100), Hombikat (101), P25 Aeorixe (105)	Other		NS	PBS (-10,3; -28,7; -24); saliva(-12; -8,46;-11,7)	NEGATIVE	0.4mg/mL; water, serum, artifcial saliva, ultrasonicated 1-24h	SONICATION	Primary size by TEM; size by LD: surface hydrophilicity (NM 101 >NM 105 >NM 100); all NMs showed high polidispersity in PBS and saliva		NA/NS	Human buccal epithelial TR146 cells	HUMAN - OTHER		NA/NS		NA		24h		h	1–200 µg/ m	NS	NS	NS	TEM, LD,	LD; TEM		all NMs showed high polidispersity in PBS and saliva; large aggregates once dispersed in media, 10–50% remained in the nanoscale range, rapidly interacting with the mucus layer and infecting the epithelium	< 100	Yes		Positive (+)	No			yes	ROS(DHE)
2017	Abu Zeid, E. H.; Alam, R. T. M.; Abd El-Hameed, N. E.	Impact of titanium dioxide on androgen receptors, seminal vesicles and thyroid hormones of male rats: possible protective trial with aged garlic extract	10.1111/and.12651		The aim of this study was to evaluate the effect of titanium dioxide (TiO2), a widely produced and consumed pigment in various food products, on the post-natal development of male albino rat seminal vesicle and thyroid hormones, as well as to evaluate the ameliorative effect of aged garlic extract (AGE) on TiO2-induced alterations. Forty male rat pups (3weeks old) were divided into four equal gro…	E171	M		> 100 nm		NS	Riedel-deHaen	Other		NS		NS	NS	NS	NS	Wistar albino rats 3 weeks old (	MICE/RAT		NA/NS		NA/NS	orally using a stomach tube	Oral gavage	daily/65days		65	d	5 g kg−1	5	5	g/kg	TEM	TEM			NS	No			No			No
2014	Gitrowski, Constantinos; Al-Jubory, Aliaa R.; Handy, Richard D.	Uptake of different crystal structures of TiO2 nanoparticles by Caco-2 intestinal cells	10.1016/j.toxlet.2014.02.014		The gastrointestinal uptake of different crystal structures of TiO2 was investigated using Caco-2 intestinal cells. Caco-2 monolayers exhibited time-dependent, saturable uptake of Ti from TiO2 exposures of 1 mgl(-1) over 24h, which was influenced by crystal type. Initial uptake rates were 5.3, 3.73, 3.58 and 4.48 nmol mg(-1) protein h(-1) for bulk, P25, anatase and rutile forms respectively. All …	Both	M	bulk (75%anatase and 25% rutile); ultrafine NP (25% anatase, 75%rutile);anatase: 10-25nm; rutile:30nm	< 25 nm; 25-50 nm		NS	bulk (Acros, New Jersey); P25 (DeGussa AG, supplied by Lawrence Industries, Tamworth, UK); Lawrence Industries, Tamworth, UK); other 2: US ResearchNanomaterials, Inc, Houston, Texas, USA	Other		NS		NS	stock dispersion of 500 mg l−1for	OTHER	TEM: 103.2 ± 16 nm (mean ± S.E.M.,n = 7), 22.8 ± 0.6 nm (mean ± S.E.M., n = 169), 16.4 ± 2.4 nm (mean ± S.E.M., n = 6) and30.8 ± 2.5 (mean ± S.E.M., n = 7) for bulk, P25, anatase and rutile, respectively		NA/NS	Caco2	HUMAN - CACO-2		NA/NS		NA		NS		h		NS	NS	NS		NS			NS	yes	SEM; EDS, pharmacological	Positive (+)	No			No
2019	Canli, Esin G.; Ila, Hasan B.; Canli, Mustafa	Response of the antioxidant enzymes of rats following oral administration of metal-oxide nanoparticles (Al2O3, CuO, TiO2)	10.1007/s11356-018-3592-8		Metal-oxide nanoparticles (NPs), as a new emerging technological compound, promise a wide range of usage areas and consequently have the potential to cause environmental toxicology. In the present work, aluminum (Al2O3), copper (CuO), and titanium (TiO2) nanoparticles (NPs) were administered via oral gavage to mature female rats (Rattus norvegicus var. albinos) for 14days with a dose series of 0 …	polycrystal structure and tetragonal phase	M	~ 21	< 25 nm		NS	Sigma-Aldrich (Germany)	Sigma	30	< 50		NS	NS	NS	NS	female Wistar Albino rats	MICE/RAT		NA/NS		NA/NS	oral gavage	Oral gavage	14 days		14	d	0 (control), 0.5, 5, and 50 (mg/kg b.w./day).	0.5	50	mg/kg/day		NS	Liver antioxidant enzymes (CAT, SOD,GPx,GST,GR)		NS	No			No			No
2016	Susewind, J.; De Souza Carvalho-Wodarz, C.; Repnik, U.; Collnot, E.-M.; Schneider-Daum, N.; Griffiths, G.W.; Lehr, C.-M.	A 3D co-culture of three human cell lines to model the inflamed intestinal mucosa for safety testing of nanomaterials	10.3109/17435390.2015.1008065	https://www.scopus.com/inward/record.uri?eid=2-s2.0-84959544878&doi=10.3109%2f17435390.2015.1008065&partnerID=40&md5=e99c351f18824c404b58035fe3d658eb	Oral exposure to nanomaterials is a current concern, asking for innovative biological test systems to assess their safety, especially also in conditions of inflammatory disorders. Aim of this study was to develop a 3D intestinal model, consisting of Caco-2 cells and two human immune cell lines, suitable to assess nanomaterial toxicity, in either healthy or diseased conditions. Human macrophages (…	NM101 (anatase)	A	7 to 10	< 25 nm		NS	JRC (Joint	JRC		NS		NS	dispersed in DMEM/10% fetal bovine serum	OTHER	NS		NA/NS	co-culture 3 cell (Caco2, 2 Human macrophages (THP-1) and human dendritic cells (MUTZ-3)	HUMAN - CACO-2/THP-1/MUTZ-3		NA/NS		NA		NS		h		NS	NS	NS		NS		700-1200nm agglomerates in FBS	500 - 1000; > 1000	No			No			No
2010	Zhang, Rong; Niu, Yujie; Li, Yawei; Zhao, Chunfang; Song, Bo; Li, Yao; Zhou, Yikai	Acute toxicity study of the interaction between titanium dioxide nanoparticles and lead acetate in mice	10.1016/j.etap.2010.03.015		Titanium dioxide (TiO2) is one kind of widely used nanoparticle, which was used as a solid-phase extraction to preconcentrated and measured of lead (Pb) in river water and seawater. However the interaction of nanoparticle TiO2 and Pb was unknown. The aim of this study is to investigate the potential acute toxicity of the interaction between nanoparticle TiO2 (50 and 120 nm) and lead acetate (PbAC…	-	NS	50 to 120	50-100 nm; >100 nm		NS	Zhejiang Hongsheng Nanotechnology Co. Ltd	Other		NS		NS	NS	NS	Size (TEM)	adult mice	MICE/RAT		NA/NS		NA/NS	oral gavage	Oral gavage	7 days		7	d	5 g/kg body weight	5	5	g/kg	TEM	TEM			NS	No			No			yes	GSH-Px; SOD, MDA; intracellular ROS (DCFA-DA)
2019	Abbasi-Oshaghi, Ebrahim; Mirzaei, Fatemeh; Pourjafar, Mona	NLRP3 inflammasome, oxidative stress, and apoptosis induced in the intestine and liver of rats treated with titanium dioxide nanoparticles: in vivo and in vitro study	10.2147/IJN.S192382		Purpose: This study evaluated the effects of titanium dioxide nanoparticles (TiO2 NPs) on liver and intestine of normal rats. Methods: Male rats were divided into four groups as follows: 1) control rats, 2) control rats that orally received 10 mg/kg TiO2 NPs, 3) control rats that orally received 50 mg/kg TiO2 NPs, and 4) control rats that orally received 100 mg/kg TiO2 NPs. After 30 days, the NLR…	rutile	R	30 nm	25-50 nm		NS	Pishgaman Nanomaterial Company (Mashhad, Iran)	Other		NS		NS	NS	NS	Size by TEM and SEM	male rats	MICE/RAT	HepG2 and Caco2	HUMAN - CACO-2/HEPG2		NA/NS	oral	Peroral exposure	30 days	24h	30	d	10, 50, 100 mg/kg	10	100	mg/kg	TEM, SEM	SEM; TEM			NS	No			No			yes	ROS (DCFH-DA); in vivo: SOD, GPx, CAT, GSH, TOS, TAC, FRAP; MDA
2014	Auttachoat, Wimolnut; McLoughlin, Colleen E.; White, Kimber L., Jr.; Smith, Matthew J.	Route-dependent systemic and local immune effects following exposure to solutions prepared from titanium dioxide nanoparticles	10.3109/1547691X.2013.844750		Nanoparticle titanium dioxide (nano-TiO2) is a white pigment widely used in foods, sunscreens, and other cosmetic products. However, it remains unclear whether exposure to nano-TiO2 results in immunosuppressive effects or induces a contact hypersensitivity response. To address these data gaps, studies were conducted with the hypothesis that nano-TiO2 exposure could alter immune responses. After 2…	anatase	A	<25 nm	< 25 nm		NS	Sigma (St. Louis, MO)CAS no. 1317-70-0	Sigma		NS		NS	sonicated for 2 min, stirred for 24h	SONICATION	NS	female B6C3F1 mice;female BALB/c mice	MICE/RAT		NA/NS		NA/NS	oral gavage	Oral gavage	28 days		28	d	12.5–250 mg/kg (TDAR, DTH, and MPS); 1.25 and 3.75 mg/kg (AFC)	1.25	250	mg/kg		NS			NS	No			No			No
2017	Hong, Fashui; Wu, Nan; Zhou, Yingjun; Ji, Li; Chen, Ting; Wang, Ling	Gastric toxicity involving alterations of gastritis-related protein expression in mice following long-term exposure to nano TiO2	10.1016/j.foodres.2017.02.013		Nano TiO2 has been widely used in food industry as a coloring agent, whether the application has adverse effects on stomach for humans and animals is rarely concerned. This study determined whether intragastric administration with nano TiO2 every day for nine months cause gastric damages and dysfunction, and is associated with changes of stomach damage-related protein expression in mice. Our resu…	anatase	A	5 nm	< 25 nm	294	> 100 nm		NS	174.8	> 100	9.28	POSITIVE	NS	NS	NS	male 4-week-old ICR mice	MICE/RAT		NA/NS		NA/NS	intragastric administration	Oral gavage	9 months		274	d	0.1mg/day	0.1	0.1	mg/day		NS			NS	No			No			No
2017	Bettini, Sarah; Boutet-Robinet, Elisa; Cartier, Christel; Comera, Christine; Gaultier, Eric; Dupuy, Jacques; Naud, Nathalie; Tache, Sylviane; Grysan, Patrick; Reguer, Solenn; Thieriet, Nathalie; Refregiers, Matthieu; Thiaudiere, Dominique; Cravedi, Jean-Pierre; Carriere, Marie; Audinot, Jean-Nicolas; Pierre, Fabrice H.; Guzylack-Piriou, Laurence; Houdeau, Eric	Food-grade TiO2 impairs intestinal and systemic immune homeostasis, initiates preneoplastic lesions and promotes aberrant crypt development in the rat colon	10.1038/srep40373		Food-grade titanium dioxide (TiO2) containing a nanoscale particle fraction (TiO2-NPs) is approved as a white pigment (E171 in Europe) in common foodstuffs, including confectionary. There are growing concerns that daily oral TiO2-NP intake is associated with an increased risk of chronic intestinal inflammation and carcinogenesis. In rats orally exposed for one week to E171 at human relevant level…	E171 and NM 105 (anatase-rutile)	M	NM105 (22±1 nm)	< 25 nm	NM105 (192.23) and E171(373.5)	> 100 nm	E171 (French commercial supplier); NM105 (EUJRC)	JRC		NS	5.03±0.02 mV and -23.9±2.4 mV for NM-105 and E171	NEGATIVE; POSITIVE	Nanogenotox protocol	SONICATION	NS	Adult male Wistar rats	MICE/RAT	Isolated immune cells (immune cells of Peyer’s patches (PP);colon epithelial cells	MURINE - OTHER		NA/NS	Intragastric gavage	Oral gavage	7 days		7	d	10 mg/kg of BW/day	10	10	mg/kg/day	DLS, zeta potential, TEM, XANES	DLS; TEM; XANES; Zeta potential			NS	yes		Positive (+)	No			No
2018	Hong, Fashui; Wang, Ling	Nanosized titanium dioxide-induced premature ovarian failure is associated with abnormalities in serum parameters in female mice	10.2147/IJN.S151215	https://pubmed.ncbi.nlm.nih.gov/29731629	BACKGROUND: Exposure to titanium dioxide nanoparticles (TiO(2) NPs) that are widely used in food, medicine, sunscreen products and cosmetics is reported to cause ovarian damage and lower fertility in animals. However, the potential effects of TiO(2) NPs application on premature ovarian failure (POF) have rarely been evaluated to date. METHODS: In this study, female mice were continuously exposed …	anatase	A	5-6 nm	< 25 nm	208-330	> 100 nm	provided by Professor Yang Ping (Chemical College of Soochow University, Suzhou, China).	Other	174.8	> 100	9.28	POSITIVE	dispersed onto the surface of 0.5% w/v HPMC, and the suspension containing TiO2 NPs was treated ultrasonically for 30 min and mechanically vibrated for 5 min	SONICATION	NS	Female specific pathogen-free (SPF) mice aged 4 weeks	MICE/RAT		NA/NS		NA/NS	Gavage instillation	Oral gavage	30 days		30	d	2.5, 5 or 10 mg/kg	2.5	10	mg/kg	XRD, TEM, DLS, BET, zeta	BET; DLS; TEM; XRD; Zeta potential			NS	No			No			No
2016	Hong, Jie; Hong, Fashui; Ze, Yuguan; Zhang, Yu-Qing	The nano-TiO2 exposure can induce hepatic inflammation involving in a JAK-STAT signalling pathway	10.1007/s11051-016-3472-4		TiO2 nanoparticles (TiO2 NPs) have unique physiochemical properties and thus are widely used in daily life. However, these nanoparticles also have potential toxic effects in humans and animals, and the issue of the security TiO2 NPs has also gained prominence. In this article, mice were administered a gavage instillation of 2.5, 5, or 10 mg/kg body weight TiO2 NPs (5-6 nm) for 90 days. We investi…	anatase	A		NS	208 to 330 nm	> 100 nm	Synthesised	Other	174.8	> 100	9.28	POSITIVE	NS	NS	NS	male mice	MICE/RAT		NA/NS		NA/NS	gavage instillation	Oral gavage	90 days		90	d	2.5, 5, or 10 mg/kg	2.5	10	mg/kg	XRD, TEM, DLS, BET, zeta	BET; DLS; TEM; XRD; Zeta potential			NS	No			No			No
2017	Morgan, Ashraf M.; Ibrahim, Marwa A.; Noshy, Peter A.	Reproductive toxicity provoked by titanium dioxide nanoparticles and the ameliorative role of Tiron in adult male rats	10.1016/j.bbrc.2017.03.098		Titanium dioxide nanoparticles (TDN) are widely used in paints, plastics, ceramics, cosmetics, printing ink, rubber and paper. Tiron is a water soluble metal chelator and antioxidant. This study was designed to investigate the reproductive toxicity of TDN in male albino rats and the ameliorative role of Tiron to minimize such toxic effects. Eighty adult male albino rats were assigned into 4 equal…	-	NS		NS		NS		NS		NS		NS	NS	NS	NS	male albino rats	MICE/RAT		NA/NS		NA/NS	oral intubation	Oral gavage	2-8 weeks	48h	56	d	100-470 mg/kg	100	470	mg/kg		NS			NS	No			No			yes	MDA, GSH, CAT
2017	Dorier, Marie; Beal, David; Marie-Desvergne, Caroline; Dubosson, Muriel; Barreau, Frederick; Houdeau, Eric; Herlin-Boime, Nathalie; Carriere, Marie	Continuous in vitro exposure of intestinal epithelial cells to E171 food additive causes oxidative stress, inducing oxidation of DNA bases but no endoplasmic reticulum stress	10.1080/17435390.2017.1349203		The whitening and opacifying properties of titanium dioxide (TiO2) are commonly exploited when it is used as a food additive (E171). However, the safety of this additive can be questioned as TiO2 nanoparticles (TiO2-NPs) have been classed at potentially toxic. This study aimed to shed some light on the mechanisms behind the potential toxicity of E171 on epithelial intestinal cells, using two in v…	E171 (anatase or anatase and rutile);P25 NM105 (anatase/rutile (86%/14%); A12 (pure anatase)	A; R; M	E171(100 and 136 nm); P25 (24 ± 6); A12 (12 ± 3)	50-100 nm; >100 nm	E171 (415.4 ± 69.5nm in water and 739.3 ± 355.3nm in cell media); 157.6 ± 1.0nm in water and 439.9 ± 6.7nm in cell culture medium	> 100 nm	E171(commercial websites); P25 (EJRC); A12(syntesised in the lab)	JRC	E171 (9,4)	< 50		NS	ultrapure sterile water (10 mg/mL), then sonicated for dispersion using an indirect cup-type sonicator (in continuous sonication mode for 30 min, 4 _x0001_C, at 52.8 W (80% amplitude),	SONICATION	NS		NA/NS	CACO-2 (differentiated); HUMAN - co-culture CACO-2/HT29-MTX	HUMAN - CACO-2/HT29-MTX		NA/NS		NA	either acutely (6–48 h) or repeatedly (three times a week for 3 weeks).	NS		h		NS	NS	NS	XRD, BET, TEM, zeta	BET; TEM; XRD; Zeta potential			NS	Yes	ICP-MS (Ti content)	Positive (+)	No			yes	ROS(H2-DCF-DA); antioxidant enzymes gene expression by RT-qPCR (CAT, SOD1; SOD2; GSR)
2018	Heringa, M. B.; Peters, R. J. B.; Bleys, R. L. A. W.; van der Lee, M. K.; Tromp, P. C.; van Kesteren, P. C. E.; van Eijkeren, J. C. H.; Undas, A. K.; Oomen, A. G.; Bouwmeester, H.	Detection of titanium particles in human liver and spleen and possible health implications	10.1186/s12989-018-0251-7		Background: Titanium dioxide (TiO2) is produced at high volumes and applied in many consumer and food products. Recent toxicokinetic modelling indicated the potential of TiO2 to accumulate in human liver and spleen upon daily oral exposure, which is not routinely investigated in chronic animal studies. A health risk from nanosized TiO2 particle consumption could not be excluded then. Results: Her…	-	NS		NS		NS		NS		NS		NS	NS	NS	NS		NA/NS		NA/NS	post-mortem, human livers and spleens	LIVER/SPLEEN		NA	6 months		183	d	2.5, 5, or 10 mg/kg body weight	2.5	10	mg/kg		NS			NS	No			No			No
2014	Hong, Jie; Wang, Ling; Zhao, Xiaoyang; Yu, Xiaohong; Sheng, Lei; Xu, Bingqing; Liu, Dong; Zhu, Yuting; Long, Yi; Hong, Fashui	Th2 Factors May Be Involved in TiO2 NP-Induced Hepatic Inflammation	10.1021/jf501428w		TiO2 nanopartides (NPs) are used in the food industry but have potential toxic effects in humans and animals. The resulting immune response is driven by the production of Th2 cytokines IL-4 and IL-5, which contribute to the development of hepatic inflammation. However, TiO2 NPs have been demonstrated to impair liver function and cause liver inflammation in animal models, which may be associated w…	anatase	A	5 to 6	< 25 nm	208 to 330 nm	> 100 nm		NS	174.8	> 100	9.28	POSITIVE	TiO2 NP powder was dispersed onto the surface of 0.5% w/v HPMC, and the suspension containing TiO2 NPs was treated ultrasonically for 30 min and mechanically vibrated for 5 min ultrasonically for 30 min and mechanically vibrated for 5 min	SONICATION	NS	160 CD-1 (ICR) male mice	MICE/RAT		NA/NS	human livers and spleens)	NA/NS	gavage instillation	Oral gavage	6 months		183	d	2.5, 5, or 10 mg/kg body weight	2.5	10	mg/kg		NS			NS	No			No			No
2010	Bu, Qian; Yan, Guangyan; Deng, Pengchi; Peng, Feng; Lin, Hongjun; Xu, Youzhi; Cao, Zhixing; Zhou, Tian; Xue, Aiqin; Wang, Yanli; Cen, Xiaobo; Zhao, Ying-Lan	NMR-based metabonomic study of the sub-acute toxicity of titanium dioxide nanoparticles in rats after oral administration	10.1088/0957-4484/21/12/125105		As titanium dioxide nanoparticles (TiO2 NPs) are widely used commercially, their potential toxicity on human health has attracted particular attention. In the present study, the oral toxicological effects of TiO2 NPs (dosed at 0.16, 0.4 and 1 g kg(-1), respectively) were investigated using conventional approaches and metabonomic analysis in Wistar rats. Serum chemistry, hematology and histopathol…	mixture of rutile and anatase	M	less than 50 nm	< 25 nm; 25-50 nm		NS	Sigma Chemical Co. (St Louis, MO)	Sigma		NS		NS	X-ray diffraction (XRD), no data	OTHER	confirmed by SEM	rats, urine and blood samples. Histopathology of liver, kidney, brain, adrenal gland, spleen, lung, heart, testis, ovary and uterus	MICE/RAT - LIVER/KIDNEY/SPLEEN/BLOOD/BRAIN/LUNG/HEART/TESTIS/OVARY		NA/NS		NA/NS	intragastric administration	Oral gavage	once a day, during 14 days		14	d	0-1g/Kg	0.16	1	g/kg		NS			NS	Yes	membrane permeability and loss of membrane integrity	Positive (+)	No			No	increased WBC and MONO
2015	Giovanni, Marcella; Tay, Chor Yong; Setyawati, Magdiel Inggrid; Xie, Jianping; Ong, Choon Nam; Fan, Rongli; Yue, Junqi; Zhang, Lifeng; Leong, David Tai	Toxicity Profiling of Water Contextual Zinc Oxide, Silver, and Titanium Dioxide Nanoparticles in Human Oral and Gastrointestinal Cell Systems	10.1002/tox.22015		Engineered nanoparticles (ENPs) are increasingly detected in water supply due to environmental release of ENPs as the by-products contained within the effluent of domestic and industrial run-off. The partial recycling of water laden with ENPs, albeit at ultra-low concentrations, may pose an uncharacterized threat to human health. In this study, we investigated the toxicity of three prevalent ENPs…	-	NS	25-30 nm	25-50 nm	260-392	> 100 nm	aeroxide P-25, Evonik Degussa, Germany	Evonik		NS	range -11,7; +21,8	NEGATIVE; POSITIVE	ultrasonication prior introducing to the cells	SONICATION	TEM observation		NA/NS	yes (TR146; NCM460)	HUMAN - OTHER		NA/NS		NA	24h	24		h	1 pg/L - 1 g/L	0.0001	100	µg/L	TEM, hydrodynamic sizes, and zeta potentials	Hydrodynamic sizes; TEM; Zeta potentials			NS	No			No			No
2019	Pinget, Gabriela; Tan, Jian; Janac, Bartlomiej; Kaakoush, Nadeem O.; Angelatos, Alexandra Sophie; O'Sullivan, John; Koay, Yen Chin; Sierro, Frederic; Davis, Joel; Divakarla, Shiva Kamini; Khanal, Dipesh; Moore, Robert J.; Stanley, Dragana; Chrzanowski, Wojciech; Macia, Laurence	Impact of the Food Additive Titanium Dioxide (E171) on Gut Microbiota-Host Interaction	10.3389/fnut.2019.00057		The interaction between gut microbiota and host plays a central role in health. Dysbiosis, detrimental changes in gut microbiota and inflammation have been reported in non-communicable diseases. While diet has a profound impact on gut microbiota composition and function, the role of food additives such as titanium dioxide (TiO2), prevalent in processed food, is less established. In this project, …	E171 - Food grade TiO2 - anatase	A	28-1,158nm	25-50 nm	367 nm	> 100 nm	All Color Supplies PTY	Other		NS	-23 (+-4,5mV)	NEGATIVE	daily sonication	SONICATION	x-ray measurement and SEM	yes, mice	MICE/RAT		NA/NS		NA/NS	drinking water	Peroral exposure	4 weeks		28	d	0-50mg TiO2/Kg BW/day	NS	50	mg/kg/day	SEM	SEM		roughly spherical in shape	NS	No			No			No
2013	Cho, Wan-Seob; Kang, Byeong-Cheol; Lee, Jong Kwon; Jeong, Jayoung; Che, Jeong-Hwan; Seok, Seung Hyeok	Comparative absorption, distribution, and excretion of titanium dioxide and zinc oxide nanoparticles after repeated oral administration	10.1186/1743-8977-10-9		Background: The in vivo kinetics of nanoparticles is an essential to understand the hazard of nanoparticles. Here, the absorption, distribution, and excretion patterns of titanium dioxide (TiO2) and zinc oxide (ZnO) nanoparticles following oral administration were evaluated. Methods: Nanoparticles were orally administered to rats for 13 weeks (7 days/week). Samples of blood, tissues (liver, kidne…	mixture of anatase 80: 20 rutile	M	21	< 25 nm	37,8	25-50 nm	ABC Nanotech Co., Ltd (Daejeon, Korea)	Other	50 +-0,4	< 50; 50-100		NS	NS	NS	TEM, SEM	mice, collecting blood, liver, spleen, kidney, brain, urine and faeces	MICE/RAT - LIVER/BLOOD/SPLEEN/KIDNET/BRAIN		NA/NS		NA/NS	Oral	Peroral exposure	Day 1 and Day 14 and during 13 weeks		91	d	520-2083 mg/Kg/day	520	2083	mg/kg/day		NS			NS	No			No		not detected in several organs studied	No
2018	Talbot, Pauline; Radziwill-Bienkowska, Joanna M.; Kamphuis, Jasper B. J.; Steenkeste, Karine; Bettini, Sarah; Robert, Veronique; Noordine, Marie-Louise; Mayeur, Camille; Gaultier, Eric; Langella, Philippe; Robbe-Masselot, Catherine; Houdeau, Eric; Thomas, Muriel; Mercier-Bonin, Muriel	Food-grade TiO2 is trapped by intestinal mucus in vitro but does not impair mucin O-glycosylation and short-chain fatty acid synthesis in vivo: implications for gut barrier protection	10.1186/s12951-018-0379-5		Background: Titanium dioxide (TiO2) particles are commonly used as a food additive (E171 in the EU) for its whitening and opacifying properties. However, the risk of gut barrier disruption is an increasing concern because of the presence of a nano-sized fraction. Food-grade E171 may interact with mucus, a gut barrier protagonist still poorly explored in food nanotoxicology. To test this hypothesi…	E171; NM105 (JRCNM01005a); P25	M	Mixture 85% anatase: 15% rutile	NS	220-255	> 100 nm	French commerical supplier	Other		NS		NS	nanogenotox dispersion	SONICATION	sonication before each experiment, TEM observation	rats	MICE/RAT	HT29-MTX	HUMAN - HT29-MTX		NA/NS	intragastric gavage	Oral gavage	7 days and 60 days		60	d	0,1 mg/Kg bw/day	0.1	0.1	mg/kg/day		NS		some aglomerates were observe by SM	NS	Yes	confocal observation, accumulation inside, TiO2 seems to be trapped into mucus, but it does not provide experimental evidence	No effect	No			No
2015	Natarajan, Vaishaali; Wilson, Christina L.; Hayward, Stephen L.; Kidambi, Srivatsan	Titanium Dioxide Nanoparticles Trigger Loss of Function and Perturbation of Mitochondrial Dynamics in Primary Hepatocytes	10.1371/journal.pone.0134541		Titanium dioxide (TiO2) nanoparticles are one of the most highly manufactured and employed nanomaterials in the world with applications in copious industrial and consumer products. The liver is a major accumulation site for many nanoparticles, including TiO2, directly through intentional exposure or indirectly through unintentional ingestion via water, food or animals and increased environmental …	P25 (3:1 mixture anatase and rutile); pure anatase; pure rutile	A; R; M	21-52nm	< 25 nm	P25 (783-841); anatase (659-739); rutile (374-396), see detail in table 1 with different concentrations	> 100 nm	P25 (Sigma aldrich, St Louis, MO); anatase and rutile (MK Nano, Mississauga, Ontario, Canada)	Sigma		NS	P25 (-6.4-10.8); anatase (-7.4-9.9); rutile (-6.5-10.2), see detail in table 1 with different concentrations	NEGATIVE	Sonicates , for 30 min and store in dark at 4C, until use	SONICATION	P25, anatase and ritule agregates with 800nm, 700nm, and 380nm, respectively		NA/NS	primary rat hepatocytes	MURINE - OTHER		NA/NS		NA	72h	72		h	concentrations between 0-1000 ppm were tested and the PC50 was calculated for the rest of the experiments: P25 (74ppm); anatase (58ppm); rutile (106ppm)	NS	1000	mg/L	TEM and SEM	SEM; TEM			NS	Yes	cellular morphology was observed by SEM	No effect	No			yes	ROS production
2016	Mohamed, Hanan R. H.; Hussien, Nahed A.	Genotoxicity Studies of Titanium Dioxide Nanoparticles (TiO(2)NPs) in the Brain of Mice	10.1155/2016/6710840		Titanium dioxide nanoparticles (TiO(2)NPs) are excessively used and represent one of the top five most commonly used nanoparticles worldwide. Recently, various studies referred to their toxic potential on various organs using different treatment route. Male Swiss Webster mice were orally administrated TiO(2)NPs (500 mg/kg b.w.) daily for five consecutive days and then animals were sacrificed at 2…	mixture of rutile and anatase forms	M	less than 100 nm	< 25 nm; 25-50 nm; 50-100 nm		NS	Sigma Chemical Co. (St. Lois, MO, USA)	Sigma		NS		NS	ultrasonication	SONICATION	tem measurement 46,23nm	mice (brain tissue)	MICE/RAT - BRAIN		NA/NS		NA/NS	oral gavage	Oral gavage	5 days (sacrified at 24h, 7 days, 14 days)		5	d	500 mg/Kg	500	500	mg/kg		NS			NS	No			No			No
2018	Richter, Jonathan W; Shull, Gabriella M; Fountain, John H; Guo, Zhongyuan; Musselman, Laura P; Fiumera, Anthony C; Mahler, Gretchen J	Titanium dioxide nanoparticle exposure alters metabolic homeostasis in a cell culture model of the intestinal epithelium and Drosophila melanogaster	10.1080/17435390.2018.1457189	https://pubmed.ncbi.nlm.nih.gov/29600885	Nanosized titanium dioxide (TiO(2)) is a common additive in food and cosmetic products. The goal of this study was to investigate if TiO(2) nanoparticles affect intestinal epithelial tissues, normal intestinal function, or metabolic homeostasis using in vitro and in vivo methods. An in vitro model of intestinal epithelial tissue was created by seeding co-cultures of Caco-2 and HT29-MTX cells on a…	anatase	A	30 nm	25-50 nm	in supplement material	NS	US Research nanomaterials, Inc., Houston, Texas	Other		NS		NS	NS	NS	SEM and TEM observation	Drosophila melanogaster	OTHER	co-culture CACO-2/HT29-MTX	HUMAN - CACO-2/HT29-MTX		NA/NS		NA	4h	4		h	1x10-4mg/ml	0.1	0.1	µg/mL	TER, sem	SEM			NS	Yes		positive?	No			yes
2013	Kaiser, Jean-Pierre; Roesslein, Matthias; Diener, Liliane; Wick, Peter	Human Health Risk of Ingested Nanoparticles That Are Added as Multifunctional Agents to Paints: an In Vitro Study	10.1371/journal.pone.0083215		Microorganisms growing on painted surfaces are not only an aesthetic problem, but also actively contribute to the weathering and deterioration of materials. A widely used strategy to combat microbial colonization is the addition of biocides to the paint. However, ecotoxic, non-degradable biocides with a broad protection range are now prohibited in Europe, so the paint industry is considering engi…	-	NS	15nm	< 25 nm	386	> 100 nm		NS		NS	-25	NEGATIVE	NS	NS	TeM observation	no	NA/NS	Caco2 and immune cells /Jurkat)	HUMAN - CACO-2		NA/NS		NA	48h	48		h	243ug/ml	243	243	µg/mL		NS			NS	No			No			yes
2019	Ali, Sanaa A.; Rizk, Maha Z.; Hamed, Manal A.; Aboul-Ela, Ezzat I.; El-Rigal, Nagy S.; Aly, Hanan F.; Abdel-Hamid, Abdel-Hamid Z.	Assessment of titanium dioxide nanoparticles toxicity via oral exposure in mice: effect of dose and particle size	10.1080/1354750X.2019.1620336		Objective: The aim of the present work is to evaluate the toxicity of titanium dioxide nanoparticles (TiO(2)NPs) according to their doses and particle sizes. Materials and methods: The effect of five days oral administration of TiO(2)NPs (21 and 80 nm) with different doses (50, 250 and 500 mg/kg body weight) was assessed in mice via measurement of oxidative stress markers; glutathione (GSH), supe…	-	NS	21-80 nm	< 25 nm; 25-50 nm; 50-100 nm		NS	Sigma-Aldrich Co. (St Louis)	Sigma		NS		NS	NS	NS	NS	mice	MICE/RAT		NA/NS		NA/NS	oral administration	Peroral exposure	5 days		5	d	50-250 and 500 mg/Kg body weight	50	500	mg/kg		NS			NS	No			No			yes	stress markers (GSH, SOD, CAT, MDA, NO and liver fuction indices
2017	Yang, Julin; Luo, Min; Tan, Zhen; Dai, Manyun; Xie, Minzhu; Lin, Jiao; Hua, Huiying; Ma, Qing; Zhao, Jinshun; Liu, Aiming	Oral administration of nano-titanium dioxide particle disrupts hepatic metabolic functions in a mouse model	10.1016/j.etap.2016.12.006		TiO2 nano-particle (TiO2 NP) is widely used in industrial, household necessities, as well as medicinal products. However, the effect of TiO2 NP on liver metabolic function has not been reported. In this study, after mice were orally administered TiO2 NP (21 nm) for 14 days, the serum and liver tissues were assayed by biochemical analysis, real time quantitative polymerase chain reaction, western …	-	NS	21nm	< 25 nm		NS	Sigma Chemical Co. (St. Lois, MO, USA)	Sigma	35-65	< 50; 50-100		NS	ultrasonication , 30 min	SONICATION	NS	male mice	MICE/RAT		NA/NS		NA/NS	oral	Peroral exposure	dayly, during 14 days		14	d						NS			NS	No			Yes	deposition of particles in hepatocytes, mitocondrial edema, and disturbance of liver metabolism functions	Positive	No
2017	Morgan, A.; Galal, M.K.; Ogaly, H.A.; Ibrahim, M.A.; Abd-Elsalam, R.M.; Noshy, P.	Tiron ameliorates oxidative stress and inflammation in titanium dioxide nanoparticles induced nephrotoxicity of male rats	10.1016/j.biopha.2017.07.006	https://www.scopus.com/inward/record.uri?eid=2-s2.0-85021959785&doi=10.1016%2fj.biopha.2017.07.006&partnerID=40&md5=095e7e731b2602cffe5a0cc62f8da730	Although the widespread use of titanium dioxide nanoparticles (TiO2 NPs), few studies were conducted on its hazard influence on human health. Tiron a synthetic vitamin E analog was proven to be a mitochondrial targeting antioxidant. The current investigation was performed to assess the efficacy of tiron against TiO2 NPs induced nephrotoxicity. Eighty adult male rats divided into four different gr…	anatase	A	10nm	< 25 nm		NS	Sigma Aldrich Chemical Co., Germany	Sigma	150	> 100		NS	shaken and dispersed via sonication for 10min before use	SONICATION	density 3.9g/ml and 99.9% purity	male albino rats	MICE/RAT		NA/NS		NA/NS	oral gavage once daily	Oral gavage	60 days		60	d	100mg/kg per day	100	100	mg/kg	frozen kidney tissues were analysed for the TiO2 content	NS			NS	No		Positive (+)	yes	oral gavage, TiO2 was observed in the kidney tissue	Positive	yes	ROS production
2015	Jones, Kate; Morton, Jackie; Smith, Ian; Jurkschat, Kerstin; Harding, Anne-Helen; Evans, Gareth	Human in vivo and in vitro studies on gastrointestinal absorption of titanium dioxide nanoparticles	10.1016/j.toxlet.2014.12.005	https://pubmed.ncbi.nlm.nih.gov/25597860	The study was designed to conduct human in vivo and in vitro studies on the gastrointestinal absorption of nanoparticles, using titanium dioxide as a model compound, and to compare nanoparticle behaviour with that of larger particles. A supplier's characterisation data may not fully describe a particle formulation. Most particles tested agreed with their supplied characterisation when assessed by…	anatase (nanoamor - 15nm) and rutile(100nm and 5um)	A	15nm-less 100nm and less 5um	< 25 nm		NS	Sigma-Aldrich, UK	Sigma		NS		NS	sonication for 20 min	SONICATION	observed by centrifugal sedimentation and TEM (1um size agglomeration).	Human volunteers	OTHER	Caco-2 cells	HUMAN - CACO-2	urine and blood samples, for TiO2 content and liver function tests	LIVER/BLOOD/URINE	oral administration	Peroral exposure	for humans, single oral dose. For cells, 3h exposure		NS	d	50-100ug/ml for cells and 5mg/kg for human volunteers	50 (in vitro) 5 (human)	100 (in vitro) 5 (human)	µg/mL mg/kg		ICP-MS		after exposure TiO2 was observed by ICP-MS	NS	No			Yes	cell penetration in vitro and with food matrices	Positive	No
2019	Talamini, Laura; Gimondi, Sa Ra; Violatto, Martina B.; Fiordaliso, Fabio; Pedica, Federica; Tran, Ngoc Lan; Sitia, Giovanni; Aureli, Federica; Raggi, Andrea; Nelissen, Inge; Cubadda, Francesco; Bigini, Paolo; Diomede, Luisa	Repeated administration of the food additive E171 to mice results in accumulation in intestine and liver and promotes an inflammatory status	10.1080/17435390.2019.1640910		Titanium dioxide (TiO2) is widely used in pharmaceuticals preparations, cosmetics, and as a food additive (E171). It contains microparticles and a fraction of nanoparticles (NPs) which can be absorbed systemically by humans after ingestion. Increasing concern has been aroused about the impact of oral exposure to TiO2 NPs from dietary and non-dietary sources on human health. In spite of several to…	anatase	A	food-grade TiO2 (200nm); only 35% of the particles measured less than 100nm	50-100 nm; >100 nm	326	> 100 nm	E171 (Pretiox AV01PhG)	Other		NS	0.18	POSITIVE	dispertion in water	OTHER	TEM and SEM observation and detection my ICP-MS	NFR mice	MICE/RAT		NA/NS		NA/NS	oral	Peroral exposure	3 days/week for 3 weeks		21	d	5mg/Kg	5	5	mg/kg		NS			NS	No		Positive (+)	Yes		Positive	yes	ROS production
2015	Pele, Laetitia C; Thoree, Vinay; Bruggraber, Sylvaine F A; Koller, Dagmar; Thompson, Richard P H; Lomer, Miranda C; Powell, Jonathan J	Pharmaceutical/food grade titanium dioxide particles are absorbed into the bloodstream of human volunteers	10.1186/s12989-015-0101-9	https://pubmed.ncbi.nlm.nih.gov/26330118	BACKGROUND: Exposure to persistent engineered nano and micro particles via the oral route is well established. Animal studies have demonstrated that, once ingested, a small proportion of such particles translocate from the gastrointestinal tract to other tissues. Exposure to titanium dioxide is widespread via the oral route, but only one study has provided indirect evidence (total titanium analys…	anatase	A	pharmaceutical/food grade (260nm)	> 100 nm		NS	Kronos 1171, Fragon UK)	Other		NS		NS	gelatine capsules	OTHER	NS		NA/NS		NA/NS	Human volunteers	BLOOD	oral	Peroral exposure	once (urine and blood samples after 0-10h after exposure)		0.4	d	100mg	100	100	mg	TiO2 measurement by ICP-MS	ICP-MS			NS	yes	occurs direct uptake and persistance after 2h and 6h ingestion	Positive (+)	No			No
2020	Chen, Zhangjian; Han, Shuo; Zheng, Pai; Zhou, Di; Zhou, Shupei; Jia, Guang	Effect of oral exposure to titanium dioxide nanoparticles on lipid metabolism in Sprague-Dawley rats	10.1039/c9nr10947a	https://pubmed.ncbi.nlm.nih.gov/32108206	Ingestion of titanium dioxide nanoparticles (TiO2 NPs) via dietary and environmental exposure may pose health risks. The research about the potential effect of orally ingested nanoparticles on nutritional metabolism has been limited. We conducted an animal experiment to investigate the effect of oral exposure to TiO2 NPs on lipid metabolism in Sprague-Dawley rats. The rats were treated with TiO2 …	anatase (99.9%pure)	A	29	25-50 nm		NS	Shanghai Macklin Reagent Co. Ltd., China	Other	77.51	50-100	11.1	POSITIVE	ultrasonication for 15 min	SONICATION	SEM, ICP-MS, XRD, etc	Sprague-Dawley rats	MICE/RAT		NA/NS		NA/NS	oral gavage once daily	Oral gavage	90 days		90	d	2-50 mg/kg/day	2	50	mg/kg/day		NS			NS	No			No			No
2015	Abdelazim, Samy A.; Darwish, Hebatallah A.; Ali, Sanaa A.; Rizk, Maha Z.; Kadry, Mai O.	Potential Antifibrotic and Angiostatic Impact of Idebenone, Carnosine and Vitamin E in Nano-Sized Titanium Dioxide-Induced Liver Injury	10.1159/000374041		Background/Aim: The present study investigated the in vitro and in vivo effects of individual and combined doses of idebenone, carnosine and vitamin E on ameliorating some of the biochemical indices of nano-sized titanium dioxide (n-TiO2) in mice liver. Methods: The in vitro cytotoxic effect of nano-sized anatase TiO2 (21 nm) on hepatic cell lines (HepG 2) was investigated. Additionally, n-TiO2 w…	-	NS	21 ± 12 nm	< 25 nm	24.27 ± 1.5 nm	25-50 nm	Sigma-Aldrich Co	Sigma		NS	-11.1 ± 1 mV	NEGATIVE	TiO2 NPs were suspended in 1 % tween 80 and dispersed by ultrasonic vibration for 15 min.	SONICATION	Only 56 ± 6 % of particles possessed this size; remaining particles were agglomerates ranging from 100 to 200 nm.	mice liver	MICE/RAT	hepatic cell lines (HepG 2)	HUMAN - OTHER		NA/NS	orally administered	Peroral exposure	2 weeks		14	d	150 mg/kg/day	150	150	mg/kg/day		NS	LW: relative liver weight, ALT: alanine aminotransferase, AST: aspartate aminotransferase and Histopathological	severe fibrosis with massive collagen fiber infiltration	NS	No			No			yes
2011	Winter, Meike; Beer, Hans-Dietmar; Hornung, Veit; Kraemer, Ursula; Schins, Roel P. F.; Foerster, Irmgard	Activation of the inflammasome by amorphous silica and TiO2 nanoparticles in murine dendritic cells	10.3109/17435390.2010.506957		Nanomaterials are increasingly used in various food applications. In particular, nanoparticulate amorphous SiO2 is already contained, e. g., in spices. Since intestinal dendritic cells (DC) could be critical targets for ingested particles, we compared the in vitro effects of amorphous silica nanoparticles with fine crystalline silica, and micron-sized with nano-sized TiO2 particles on DC. TiO2- a…	77% anatase and 23%rutile	M	20–80 nm	< 25 nm; 25-50 nm; 50-100 nm		NS	Sigma Aldrich	Sigma	50 m2/g	< 50; 50-100		NS	onicated for30 min in a Sonorex TK52 waterbath (60 W,35 kHz)	SONICATION	NS		NA/NS	DC from mice	MURINE - OTHER		NA/NS	cells added	NA	18h	18		h	5, 20 and 40mg/cm2particles	5	40	mg/cm2		NS			NS	yes	Uptake of particles by DC was evaluated by means of flow-cytometry according to na established method (Haberzettl et al. 2007, 2008)	Positive (+)	No			yes	ROS production
2011	Wang, Yonggang; Aker, Winfred G.; Hwang, Huey-min; Yedjou, Clement G.; Yu, Hongtao; Tchounwou, Paul B.	A study of the mechanism of in vitro cytotoxicity of metal oxide nanoparticles using catfish primary hepatocytes and human HepG2 cells	10.1016/j.scitotenv.2011.07.039		Nanoparticles (NPs), including nanometal oxides, are being used in diverse applications such as medicine, clothing, cosmetics and food. In order to promote the safe development of nanotechnology, it is essential to assess the potential adverse health consequences associated with human exposure. The liver is a target site for NP toxicity, due to NP accumulation within it after ingestion, inhalatio…	-	NS	17–64	< 25 nm; 25-50 nm; 50-100 nm		NS	Sigma Aldrich 13463-67-7	Sigma	35.5	< 50		NS	MilliQ water by 30 min of sonication with a FS30ultrasonic system (Fisher Scientific)	SONICATION	Rhomboid/spherical. Purity of 99.9%		NA/NS	HepG2 cells and catfish primary hepatocytes.	HUMAN - OTHER		NA/NS	add in cells	NA	48h	48		h	25, 50, 100, 200 mg/l	25	200	mg/L	Phase contrast microscopy light micrographs and TEM	Phase contrast microscopy light micrographs; TEM			NS	No			No			yes	ROS production
2018	Chen, Zhangjian; Wang, Yun; Wang, Xiang; Zhuo, Lin; Chen, Shi; Tang, Shichuan; Zhao, Lin; Luan, Xianguo; Jia, Guang	Effect of titanium dioxide nanoparticles on glucose homeostasis after oral administration	10.1002/jat.3589		As food additives, titanium dioxide nanoparticles (TiO2 NPs) have been widely used in various products that are usually simultaneously consumed with a high content of sugar, thus necessitating research on the effect of TiO2 NPs on glucose homeostasis. We conducted an animal study to explore the effect of orally administrated TiO2 NPs on glucose absorption and metabolism in rats at 0, 2, 10 and 50…	spherical and anatase crystals	A	24 ± 5 nm	< 25 nm		NS	Shanghai Aladdin Reagent Co. Ltd	Aladdin	63.95 m2/g	50-100		NS	The TiO2 NPs were dispersed in ultrapure water and sonicated for 15 minutes.	SONICATION	purity of 99.90%	rat	MICE/RAT		NA/NS		NA/NS	oral	Peroral exposure	30 and 90 days		90	d	0, 2, 10, 50 mg kg–1BW	2	50	mg/kg	TEM	TEM		results suggested that TiO2 NPs tended to agglomerate to form larger particles in the gastrointestinal tract.	NS	No			No			No
2016	Chen, Chieh-Wei; Huang, Jing-Hong; Lai, Tsung-Ching; Jan, Yi-Hua; Hsiao, Michael; Chen, Chung-Hsuan; Hwu, Yeu-Kuang; Liu, Ru-Shi	Evaluation of the intracellular uptake and cytotoxicity effect of TiO2 nanostructures for various human oral and lung cells under dark conditions	10.1039/c5tx00312a		Titanium dioxide (TiO2) nanomaterials (NMs) have been widely used to develop commercial products such as sunscreen cosmetics because of their unique optical properties to provide complete protection from ultraviolet (UV) light. The most dangerous type of UV radiation is UVA, which comprises nearly 97% of the UV radiation that reaches the Earth. This type of radiation is also the major cause of sk…	M212 - rutile; AFDC and AFDC300 - anatase crystallin	A; R		NS		NS	Top Rhyme International Company.	Other		NS		NS	NS	NS	TiO2NMs (M212, AFDC and AFDC300)		NA/NS	I-38, BEAS,OMFs, and S–G gingival epithelial cells	HUMAN - OTHER		NA/NS	add in cells	NA	72h	72		h	100μgmL−1 and 1000μgmL−1	100	1000	µg/mL	TEM and X-ray diffraction (XRD	TEM; XRD		M212 has a rod shape with alength of 28 ± 8.4 nm and a width of 10 ± 1.4 nm, whereas AFDC and AFDC300 are spherical with a diameter of 142 ±22.7 nm and 214 ± 46.1 nm	< 100; 100 - 500	No		Positive (+)	No			No
2020	Hu, Hailong; Zhang, Boya; Li, Li; Guo, Qian; Yang, Daqian; Wei, Xiangjuan; Fan, Xingpei; Liu, Jing; Wu, Qiong; Oh, Yuri; Feng, Yujie; Chen, Kun; Wang, Changlin; Hou, Liping; Gu, Ning	The toxic effects of titanium dioxide nanoparticles on plasma glucose metabolism are more severe in developing mice than in adult mice	10.1002/tox.22880		Titanium dioxide nanoparticles (TiO2 NPs) are authorized food additives, and children have the highest exposure. Therefore, children are likely more susceptible to the adverse effects of TiO2 NPs than adults. Previous study showed that oral administration of 50 mg/kg body weight (bw) TiO2 NPs increase plasma glucose in mice. However, few studies have directly compared the adverse effects of expos…	-	NS	TEM and SEM: 25.37 ± 4.17 nm	25-50 nm	34.34 ± 6.33 nm	25-50 nm	igma Co., Ltd.	Sigma		NS		NS	NS	NS	ll zeta potential values of TiO2NPs were negative	Twenty male CD-1 (ICR) developing mice and adult mice were obtained from Harbin Veterinary Research Institute (China)	MICE/RAT		NA/NS		NA/NS	oral administration	Peroral exposure			NS	d	TiO2NP/PBS suspension (50 mg/kg body weight(bw), 200μL per day)	50	50	mg/kg		NS			NS	No			No			yes	ROS levels were assessed using the levels of total SOD (T-SOD), GSH,and MDA
2017	Kurzawa-Zegota, Malgorzata; Sharma, Vyom; Najafzadeh, Mojgan; Reynolds, P. Dominic; Davies, Justin P.; Shukla, Ritesh K.; Dhawan, Alok; Anderson, Diana	Titanium Dioxide Nanoparticles Induce DNA Damage in Peripheral Blood Lymphocytes from Polyposis coli, Colon Cancer Patients and Healthy Individuals: An Ex Vivo/In Vitro Study	10.1166/jnn.2017.14691		Titanium dioxide (TiO2), in bulk and nanomaterial format, has been used as a whitening and brightening agent in pigments, paints, plastics and paper, but also as an ingredient of pharmaceutical products and increasingly as a food additive. TiO2 nanoparticles (NPs) have been also reported in soil, vegetables and the human body suggesting that the gastrointestinal tract may be a very important rout…	anatase	A	average size 34 nm	25-50 nm		NS	Sigma-Aldrich, UK	Sigma	200–220 m2/g	> 100	−28.7 mV	NEGATIVE	MSE ultrasonic disinte-grator (MK2, 150 Watt) at a current of 30 W for 3 min	SONICATION	purity at least 99.7%		NA/NS		NA/NS	Human blood cells: lymphocytes or whole blood cells	BLOOD	add in cells	NA	0, 2, 24 and 48 h	48		h	10, 40 and 80ug/ml	10	80	µg/mL	DLS, Zeta potencial and SEM	DLS; SEM; Zeta potencial		Zeta potential measurements revealedthat TiO2NPs had a negative surface charge in different physiological media;The size was widely distributed and ranged from 104 nm(10ug/ml TiO2NPs in water) to 1303 nm (80ug/mlTiO2NPs in RPMI); The average size reported by SEM was 34 nm (range 20–64nm) and the particles were found to be spherical in shape	100 - 500; 500 - 1000; > 1000	No			No			No
2018	Elnagar, Amir M. Bassam; Ibrahim, Abdelnasser; Soliman, Amro Mohamed	Histopathological Effects of Titanium Dioxide Nanoparticles and The Possible Protective Role of N-Acetylcysteine on The Testes of Male Albino Rats	10.22074/ijfs.2018.5389		Background: Titanium dioxide (TiO2) is a white pigment which is used in paints, plastics, etc. It is reported that TiO2 induces oxidative stress and DNA damage. N-acetylcysteine (NAC) has been used to fight oxidative stress-induced damage in different tissues. The objective of this study was to evaluate the toxic effects of orally administered TiO2 nanoparticles and the possible protective effect…	-	NS	21 nm size	< 25 nm		NS	Titanos, China	Other		NS		NS	NS	NS	≥99.5% purity dissolved in gum acacia solution	testicular cells of Fifty male albino rats weighing 150-200 g	MICE/RAT - TESTIS		NA/NS		NA/NS	oral gavage once daily	Oral gavage	for 12 weeks		84	d	0, 100mg/kg, 1200mg/kg	100	1200	mg/kg		NS			NS	No			No			No
2020	Grissa, Intissar; ElGhoul, Jaber; Mrimi, Rhizlaine; El Mir, Lassaad; Ben Cheikh, Hassen; Horcajada, Patricia	In deep evaluation of the neurotoxicity of orally administered TiO2 nanoparticles	10.1016/j.brainresbull.2019.10.005		Titanium dioxide nanoparticles were widely used in food as dietary supplements, in drugs, in toothpaste, ect. Few numbers of studies were interested to the neurotoxicity of TiO2 NPs through oral pathway. The present study aims firstly to understand the connection between the physicochemical properties of TiO2 NPs and their associated toxicological oral pathway by evaluation the colloidal stabilit…	anatase	A	5 to 12 nm	< 25 nm		NS	AZ tech (Italy)	Other		NS	-17±0,2 mV	NEGATIVE	dissolved in distilled water byultrasonic bathfor 30 min to make the homogeneous suspension and mechanically vibrated for 5 min before every use	SONICATION	NS	rats brain	MICE/RAT - BRAIN		NA/NS		NA/NS	ntragastric administration	Oral gavage	8 weeks		56	d	50, 100 and 200 mg/kg bw TiO2NPs	50	200	mg/kg		NS		TiO2 NPs show a strong aggregation (602 ± 15 nm)	500 - 1000	No		Positive (+)	No			No	level of antoioxidative enzymes
2018	Li, Juan; Yang, Shengmei; Lei, Runhong; Gu, Weihong; Qin, Yanxia; Ma, Sihan; Chen, Kui; Chang, Yanan; Bai, Xue; Xia, Shibo; Wu, Chongming; Xing, Gengmei	Oral administration of rutile and anatase TiO2 nanoparticles shifts mouse gut microbiota structure	10.1039/c8nr00386f		The widespread application of TiO2 nanoparticles (NPs) as additives in foods such as gum, candy and puddings has dramatically increased the human ingestion and accumulation of these nanomaterials. Although the toxicity of TiO2 NPs has been extensively studied, their impact on gut microbiota in vivo still needs further research. In this study, TiO2 NPs with two main crystalline phases anatase and …	Rutile and anatase	A; R	anatase NPs in water, simulated gastric fluid, and simulated intestinal fluid were 20.13 ± 0.18, 134.45 ± 21.64, and 419.99 ± 24.82 nm, respectively. The corresponding sizes of rutile NPs were 15.91 ± 0.05, 148.1 ± 29.51, and 360.92 ± 7.61 nm	< 25nm; > 100nm		NS	Alfa Aesar (Ward Hill, MA, USA)	Other		NS	natase and rutile NPs were -4.26 ± 1.81 and -10.05 ± 1.98 mV, respectively in water, -32.56 ± 5.24 and -19.85 ± 0.11 mV in simulated gastric fluid, and -13.67 ± 6.89 and -6.33 ± 3.24 mV in simulated intestinal fluid	NEGATIVE	NS	NS	NS	mice fresh feces; and piece of liver, spleen, kidney, lung, heart, brain, jejunum and colon	MICE/RAT - LIVER/SPLEEN/KIDNEY/LUNG/HEART/BRAIN/GIT		NA/NS		NA/NS	gavage	Oral gavage	28 days		28	d	100mg/kg per day	100	100	mg/kg/day	nalyzed the titanium content in blood and feces by inductively coupled plasma mass spectrometry (ICP-MS)	ICP-MS		very little titanium in the blood; more titanium accumulated in the feces of TiO2 NP-treated mice compared to control mice. ecal TiO2 accumulation of anatase NPs was significantly higher than that for rutile NPs.	NS	No	titanium levels in the gut, spleen, lung, and kidney	Positive (+)	No			No
2018	Karimipour, Mojtaba; Javanmard, Masoumeh Zirak; Ahmadi, Abbas; Jafari, Abbas	Oral administration of titanium dioxide nanoparticle through ovarian tissue alterations impairs mice embryonic development			Background: Titanium dioxide nanoparticle (TiO2NP) is commonly used in industrial products including food colorant, cosmetics, and drugs. Previous studies have shown that oral administration of TiO2NP can be toxic to the reproductive system, but little is known if TiO2NP could be able to affect the functions of the female reproductive system, in particular fertility. Objective: The objective was …	99% anatase	A	10-25nm	< 25 nm		NS	US Research Nanomaterials, Inc.	Other		NS		NS	sonicated for 10 min	SONICATION	prepared every wk in phosphate buffered saline (pH= 7.4) with 0.5% Tween 80	ovaries from mice	MICE/RAT - OVARY	mature oocytes	MURINE - OTHER		NA/NS	orally administered	Peroral exposure	5 wk		35	d	100 mg/kg	100	100	mg/kg		NS			NS	No			No			No
2019	Kim, Do-Hee; Kundu, Juthika; Chae, In Gyeong; Lee, Jong Kwon; Heo, Jung Sun; Chun, Kyung-Soo	Titanium dioxide nanoparticles induce COX-2 expression through ROS generation in human periodontal ligament cells	10.2131/jts.44.335	https://pubmed.ncbi.nlm.nih.gov/31068539	Titanium dioxide nanoparticles (TiO(2)-NPs) are used to improve the aesthetic of toothpaste. While TiO(2)-NPs have been used safely in toothpaste products for a long time, there haven't been studies to determine whether absorption of TiO(2)-NPs by the mucous membranes in the mouth induces pathogenic conditions. Here, we assessed whether TiO(2)-NPs induce cyclooxygenase-2 (COX-2) and investigated …	99% anatase	A	15nm	< 25 nm		NS	Nanoamor, USA	Other	240m2/g	> 100		NS	NS	NS	NS		NA/NS	Peridontal ligament cells	NA/NS	PDLs were obtained from extracted human molars donated by the Department of Oral and Maxillofacial Surgery, Kyung Hee University	GIT	add in cells	NA	24h or 48h	48		h	10 ,20 or 50 μg/mL	10	50	µg/mL		NS			NS	No			No			yes	measurement of ROS accumulation
2015	Gu, Ning; Hu, Hailong; Guo, Qian; Jin, Sanli; Wang, Changlin; Oh, Yuri; Feng, Yujie; Wu, Qiong	Effects of oral administration of titanium dioxide fine-sized particles on plasma glucose in mice	10.1016/j.fct.2015.10.003		Titanium dioxide (TiO2) is an authorized additive used as a food colorant, is composed of nano-sized particles (NP) and fine-sized particles (FP). Previous study reported that oral administration of TiO2 NPs triggers an increase in plasma glucose of mice. However, no previous studies have focused on toxic effects of TiO2 FPs on plasma glucose homeostasis following oral administration. In the curr…	anatase	A	18.31 ± 2.61 nm	< 25 nm		NS	Veking Co., Ltd, Hangzhou, China	Other		NS		NS	NS	NS	NS		NA/NS		NA/NS		NA/NS	oral administration	Peroral exposure	0, 0.5, 1, 2, 4, 6, 9, 12, 24 h		1	d	64 mg/kg	64	64	mg/kg	DLS and SEM	DLS; SEM		55.34 ± 1.41 nm, congregate and form larger particles in PBS	< 100	No			No			yes	ROS production
2017	Ebrahimzadeh Bideskan, Alireza; Mohammadipour, Abbas; Fazel, Alireza; Haghir, Hossein; Rafatpanah, Houshang; Hosseini, Mahmoud; Rajabzadeh, Aliakbar	Maternal exposure to titanium dioxide nanoparticles during pregnancy and lactation alters offspring hippocampal mRNA BAX and Bcl-2 levels, induces apoptosis and decreases neurogenesis	10.1016/j.etp.2017.02.006	https://pubmed.ncbi.nlm.nih.gov/28254502	INTRODUCTION: The usage of Titanium dioxide nanoparticles (TiO(2)-NPs) covers a vast area in different fields ranging from cosmetics and food to the production of drugs. Maternal exposure to TiO(2)-NPs during developmental period has been associated with hippocampal injury and with a decrease in learning and memory status of the offspring. However, little is known about its injury mechanism. This…	anatase	A	less than 100nm	< 25 nm; 25-50 nm; 50-100 nm		NS	NanoLima,Co.(Iran)	Other	>150m2/g	> 100		NS	NS	NS	+99% purity; density: 3.9g/m3	brains of Pregnant and lactating Wistar rats	MICE/RAT - BRAIN		NA/NS		NA/NS	gavage	Oral gavage	2 to 21 days		21	d	100mg/kg	100	100	mg/kg		NS			NS	No			No			No
2018	Ibrahim, R.; Salem, M.Y.; Helal, O.K.; Abd El-Monem, S.N.	Effect of titanium dioxide nanoparticles on the spleen of adult male albino rats: Histological and immunohistochemical study	10.21608/EJH.2019.25408	https://www.scopus.com/inward/record.uri?eid=2-s2.0-85066858980&doi=10.21608%2fEJH.2019.25408&partnerID=40&md5=11e334ff312525a0090211887116ddb5	Introduction: Titanium dioxide nanoparticles (TiO2 NPs) are commonly used in industry (e.g. cosmetics, sunscreens, food products, paints and drugs). But, they have different adverse cellular effects including oxidative stress and cellular damage. Aim of the work: To evaluate the possible toxic effect of titanium dioxide nanoparticles on the structure of the spleen of rats. Materials and Methods: …	-	NS	80nm	50-100 nm		NS	Neminath Industrial Estate	Other		NS		NS	NS	NS	NS	spleen of albino rats	MICE/RAT - SPLEEN		NA/NS		NA/NS	orally by gastric gavage	Oral gavage	4, 8 and 12 wk		84	d	600mg/Kg/day or 1200mg/kg/day	600	1200	mg/kg/day		NS			NS	No			No			No
2017	Schneider, Thomas; Westermann, Martin; Glei, Michael	In vitro uptake and toxicity studies of metal nanoparticles and metal oxide nanoparticles in human HT29 cells	10.1007/s00204-017-1976-z		In this paper, we investigated the toxicological behavior of metal nanoparticles (gold, silver) and metal oxide nanoparticles (copper oxide, zinc oxide, titanium dioxide) in vitro in human colorectal adenocarcinoma cells (HT29). We analyzed the cellular uptake by ICP-MS and TEM, the influence on cell viability by MTT assay and trypan blue exclusion test, their effect on DNA damage and/or generati…	Rutile and anatase	A; R	21	< 25 nm		NS	Sigma Aldrich	Sigma	35-65	< 50		NS	Solutions freshly prepared before usage. Briefly, stock solutions have been adjusted to 1 mg nanopowder in 1 ml 0.9% NaCl. The resulting solution was mixed overnight and subsequently put in ultrasonic bath for 30 min.	OTHER	Aeroxide® P25, Titania, Titanium dioxide; Characteristics were retrieved from manufacturer info, not from paper		NA/NS	HT29 - human colorectal adenocarcinoma cell line	HUMAN - OTHER		NA/NS		NA	24h	24		h	2-10 μg/ml	2	10	µg/mL	DLS, Zeta potential, ICP-MS; after dilution in exposure media	DLS; ICP-MS; Zeta potential		Zav= 27.38 ± 5.90; Z pot = −10.20 ± 3.20; Conc = 99.2 ug/mL	NS	yes	ICP-MS according to the international standard; TEM (DIN EN ISO 17294-2:2005-02).	Positive (+)	No			No
2016	Agnihothram, Sudhakar; Mullis, Lisa; Townsend, Todd A; Watanabe, Fumiya; Mustafa, Thikra; Biris, Alexandru; Manjanatha, Mugimane G; Azevedo, Marli P; United States Food and Drug Administration, National Center for Toxicological Research	Titanium Dioxide Nanoparticles Evoke Proinflammatory Response during Murine Norovirus Infection Despite Having Minimal Effects on Virus Replication	10.25141/2474-8811-2016-3.0063	https://pubmed.ncbi.nlm.nih.gov/29930994	Noroviruses (NoV) have enhanced tropism for the gastrointestinal (GI) tract and are the major cause of nonbacterial gastroenteritis in humans. Titanium dioxide (TiO2) nanoparticles (NPs) used as food additives, dietary supplements, and cosmetics accumulate in the GI tract. We investigated the effect anatase TiO2 NPs on NoV replication and host response during virus infection, using murine norovir…	anatase	A		NS		NS		NS		NS		NS	NS	NS	NS	No	NA/NS	RAW 264.7 macrophages	HUMAN - OTHER	No	NA/NS		NA	24h or 48h	48		h	20 μg/ml and 2 μg/ml for 3 h	2	20	µg/mL		NS			NS	No			No			No
2017	Martins, Airton da Cunha, Jr.; Azevedoa, Lara Ferreira; de Souza Rocha, Cecilia Cristina; Hornos Carneiro, Maria Fernanda; Venancio, Vinicius Paula; de Almeida, Mara Ribeiro; Greggi Antunes, Lusania Maria; Hott, Rodrigo de Carvalho; Rodrigues, Jairo Lisboa; Ogunjimi, Abayomi T.; Adeyemi, Joseph A.; Barbosa, Fernando, Jr.	Evaluation of distribution, redox parameters, and genotoxicity in Wistar rats co-exposed to silver and titanium dioxide nanoparticles	10.1080/15287394.2017.1357376		The increasing production of silver nanoparticles (AgNPs) and titanium dioxide nanoparticles (TiO(2)NPs) has resulted in their elevated concentrations in the environment. This study was, therefore, aimed at determining the distribution, redox parameters, and genotoxic effects in male Wistar rats that were treated with either AgNP or TiO2NP individually, as well as under a co-exposure scenario. An…	-	NS		NS		NS	Sigma Aldrich, CAS 13463-67-7	Sigma		NS		NS	NS	NS	NS	Rats; blood, liver and kidney	MICE/RAT - LIVER/BLOOD/KIDNEY	No	NA/NS	No	NA/NS	oral gavage	Oral gavage	daily for 45 days		45	d	0.5 mg/kg	0.5	0.5	mg/kg	DLS, TEM	DLS; TEM		TEM size: 41.99 ± 1.63 nm; hydrodynamic diameter: 447.67 ± 6.43 nm	< 100	yes	Organ uptake by Ti content (ICP-MS) kidneys, blood and liver	Positive (+)	yes	Ti content (ICP-MS) kidneys, blood and liver	Positive	yes	GSH and catalase activity
2016	Hu, Hailong; Li, Li; Guo, Qian; Jin, Sanli; Zhou, Ying; Oh, Yuri; Feng, Yujie; Wu, Qiong; Gu, Ning	A mechanistic study to increase understanding of titanium dioxide nanoparticles-increased plasma glucose in mice	10.1016/j.fct.2016.07.010		Titanium dioxide nanoparticle (TiO2 NP) is an authorized food additive. Previous studies determined oral administration of TiO2 NPs increases plasma glucose in mice via inducing insulin resistance. An increase in reactive oxygen species (ROS) has been considered the possible mechanism of increasing plasma glucose. However, persistently high plasma glucose is also a mechanism of increasing ROS. Th…	P25 (anatase/rutile	M	21	< 25 nm		NS	Sigma Aldrich , P25, #718467	Sigma	35-65	< 50; 50-100		NS	NPs were suspended in PBS and vigorously stirred by using ultrasonic wave at 300 W for 72 cycles (each cycle consisted of 10 s ON and 15 s OFF).	SONICATION	NS	CD-1 mice	MICE/RAT		NA/NS		NA/NS	oral administration using syringe	Peroral exposure	18 weeks		126	d	64 mg/kg body weight per day, given to mice by a syringe via the oral administration	64	64	mg/kg/day	SEM, TEM and DLS.	DLS; SEM; TEM		Anatase/rutile; Size by TEM: 25.37 ± 4.17 nm; Zav = 50.1 ± 6.33 nm. Zpot=-8.19 ± 4.15	< 100	yes	Titanium content analysis in tissues by ICP-OES	Positive (+)	yes	Titanium content analysis in tissues by ICP-OES	Positive	yes	ROS production
2016	Liang, Z.; Zhang, F.; Zhang, H.	In Vitro response of immune cells on metal oxide nanoparticles with different solubility	10.1166/jnn.2016.11751	https://www.scopus.com/inward/record.uri?eid=2-s2.0-84974539733&doi=10.1166%2fjnn.2016.11751&partnerID=40&md5=328e7b2001dd9d083710dfa765ffd05d	In this study, three engineered metal oxide nanoparticles (NPs) with similar size but significantly different solubility were used to study the cellular uptake, toxicity and immune activation of Raw 264.7 cells. Commercially available TiO2, Fe2O3 and ZnO NPs were used in this study. Although the size of three pristine NPs are different, all three NPs showed similar aggregation state (250-300 nm) …	-	NS		NS		NS	US Research Nanomaterials, Inc. (Houston, USA)	Other		NS		NS	NS	NS	NS	no	NA/NS	Raw 264.7 - mouse leukaemic monocyte macrophage cell line	MOUSE-others	No	NA/NS		NA	24h or 48h	48		h	50 ug/ml	50	50	µg/mL	TEM, DLS, Protein adsortion, dissolution	DLS; Dissolution; Protein adsortion; TEM		Size=9.8±3.2; 16 nm in water; 2100 nm in medium; 248 nm in medium with 10%serum; serum proteins were obviously adsorbed after 1 h incubation in a medium containing 10% serum and further increased along with the incubation time until 12 h. TiO2 NPs adsorbed higher amount of proteins (about 80 g/mg NPs); very low solubility with a value smaller than 0.1 ng/mL.	> 1000	yes	By ICP-AES	Positive (+)	No			No	ROS production
2017	Jia, Xiaochuan; Wang, Shuo; Zhou, Lei; Sun, Li	The Potential Liver, Brain, and Embryo Toxicity of Titanium Dioxide Nanoparticles on Mice	10.1186/s11671-017-2242-2		Nanoscale titanium dioxide (nano-TiO2) has been widely used in industry and medicine. However, the safety of nano-TiO2 exposure remains unclear. In this study, we evaluated the liver, brain, and embryo toxicity and the underlying mechanism of nano-TiO2 using mice models. The results showed that titanium was distributed to and accumulated in the heart, brain, spleen, lung, and kidney of mice after…	anatase	A	5 nm and 10, 50, 90nm	< 25 nm; 50-100 nm		NS	Sigma-Aldrich and Run He Ltd	Sigma		NS		NS	NS	NS	NS	Mouse; liver	MICE/RAT - LIVER		NA/NS		NA/NS	Gavage	Oral gavage	Regimen 2: 60 days		60	d	Dosing Regimen 2: 5, 10, 50 mg/kg once per day through gavage for 60 days	5	50	mg/kg	not done	NS		not done	NS	yes	TEM	Positive (+)	No			yes	superoxide anion (O2–) levels, catalase activity (CAT), lipid peroxidation by the content of malondialdehyde (MDA)
2018	Pereira, L.C.; Pazin, M.; Franco-Bernardes, M.F.; Martins, Jr, A.D.C.; Barcelos, G.R.M.; Pereira, M.C.; Mesquita, J.P.; Rodrigues, J.L.; Barbosa, Jr, F.; Dorta, D.J.	A perspective of mitochondrial dysfunction in rats treated with silver and titanium nanoparticles (AgNPs and TiNPs)	10.1016/j.jtemb.2018.01.007	https://www.scopus.com/inward/record.uri?eid=2-s2.0-85041661403&doi=10.1016%2fj.jtemb.2018.01.007&partnerID=40&md5=a5429a81197bcdc86f20c870d76997a3	Nanotechnology is a growing branch of science that deals with the development of structural features bearing at least one dimension in the nano range. More specifically, nanomaterials are defined as objects with dimensions that range from 1 to 100 nm, which give rise to interesting properties. In particular, silver and titanium nanoparticles (AgNPs and TiNPs, respectively) are known for their bio…	-	NS	21	< 25 nm		NS	Sigma Aldrich, CAS 13463-67-7	Sigma	35-65	< 50; 50-100		NS	NS	NS	NS	Wistar rats; liver	MICE/RAT - LIVER		NA/NS		NA/NS	Gavage	Oral gavage	21 days		21	d	100 μg/kg/day)	100	100	µg/kg/day	DLS, X-ray diffractometer	DLS; XRD		anatase and rutile, Zpot = −5.07 ± 1.11	NS	No			No			yes	Mitochondrial dysfunction and GSH/GSSG ratio
2012	Onishchenko, G. E.; Erokhina, M. V.; Abramchuk, S. S.; Shaitan, K. V.; Raspopov, R. V.; Smirnova, V. V.; Vasilevskaya, L. S.; Gmoshinski, I. V.; Kirpichnikov, M. P.; Tutelyan, V. A.	Effects of Titanium Dioxide Nanoparticles on Small Intestinal Mucosa in Rats	10.1007/s10517-012-1928-9		Penetration of titanium dioxide nanoparticles into enterocytes after their administration into isolated loop of rat small intestine was shown in vivo by transmission electron microscopy. Using electron diffraction, titanium dioxide nanoparticles were identified in the apical regions of the cells under plasma membranes and in deeper parts of the cytoplasm as solitary objects or small aggregations.…	rutile/anatase and E171	M		NS		NS		NS		NS		NS	dispersion in distilled water	OTHER	NS	Wistar rats, liver	MICE/RAT - LIVER		NA/NS		NA/NS	intragastrically	Oral gavage	28 days		28	d	1 or 100 mg/kg	1	100	mg/kg		NS			NS	No			Yes	Ti content by ICP-MS in liver	Negative (oral) and Positive (intragastric)	No
2019	Moradi, Arash; Ziamajidi, Nasrin; Ghafourikhosroshahi, Abolfazl; Abbasalipourkabir, Roghayeh	Effects of vitamin A and vitamin E on attenuation of titanium dioxide nanoparticles-induced toxicity in the liver of male Wistar rats	10.1007/s11033-019-04752-4		The increasing application of titanium dioxide nanoparticles (NTiO2) in life and the toxicity potential of these nanoparticles have raised concerns about their detrimental effects on human health. This study was conducted to investigate the hepatoprotective effects of vitamin E and vitamin A against hepatotoxicity induced by NTiO2 in rats. Thirty-six male Wistar rats were randomly divided into si…	80 vol% anatase + 20 vol% rutile	M	20	< 25 nm		NS	Iranian Nanomaterials Pioneers Company, NANOSANY (Mashhad, Iran)	Other	10–45	< 50		NS	stock suspension at 2 g/ml concentration was prepared by suspending TiO2 in bi-distilled water. Before each administration, the stock solution was diluted in bi-distilled water to obtain the desired concentration (300 mg/kg body weight), and then placed in a sonication device for 10–15 min in order to disperse nanoparticles and prevent agglutination.	OTHER	NS	Wistar rats; liver	MICE/RAT - LIVER		NA/NS		NA/NS	Gavage	Oral gavage	14 days		14	d	300 mg/kg	300	300	mg/kg		NS			NS	No			No			yes	Antioxidative enzymes activity in rat liver: Catalase, SOD, GPX
2013	Chalew, Talia E. Abbott; Schwab, Kellogg J.	Toxicity of commercially available engineered nanoparticles to Caco-2 and SW480 human intestinal epithelial cells	10.1007/s10565-013-9241-6		The effects of ingestion of engineered nanoparticles (NPs), especially via drinking water, are unknown. Using NPs spiked into synthetic water and cell culture media, we investigated cell death, oxidative stress, and inflammatory effects of silver (Ag), titanium dioxide (TiO2), and zinc oxide (ZnO) NPs on human intestinal Caco-2 and SW480 cells. ZnO NPs were cytotoxic to both cell lines, while Ag …	80% rutile, 20% anatase	M	21	< 25 nm		NS	Evonik Degussa (Aeroxide P25) (Pasippany, NJ, USA)	Evonik	50	< 50; 50-100	-25.3	NEGATIVE	The suspension was vortexed and pulse sonicated for 4 min with 0.5 s pulses at 20 kHz (550 Sonic Dismembrator, Fisher Scientific, Pittsburgh, PA, USA). Nanoparticle stocks were diluted into Caco-2 and SW480 maintenance media (all components listed above except 2 % FBS) at a concentration of 1,000 mg/L and water bath sonicated for 15 min at 60Hz (Aquasonic 250HT, VWR Scientific, Mississauga, ON, C…	SONICATION	Nanopowders and nanoparticles suspended in ultra-pure water were characterized by manufacturer for size, shape, zeta potential, specific surface area, elemental analysis, and surface coatings (Abbott Chalew 2012). Electronic supplementary material (ESM).		NA/NS	human intestinal Caco-2 and SW480 (colorectal adenocarcinoma)cells	HUMAN - CACO-2/SW480		NA/NS		NA	24h or 48h	48		h	0, 0.1, 1, 10, and 100 mg/L.	0.1	100	mg/L	NP suspensions (10 mg/L) in maintenance media were evaluated for NP aggregation over 48 h using dynamic light scattering with a Zetasizer ZS90	NS		NPs aggregated in both Caco-2 and SW480 maintenance cell culture media. Size 311 to 305 nm	100 - 500	No			No			yes	ROS
2013	De Angelis, Isabella; Barone, Flavia; Zijno, Andrea; Bizzarri, Loreline; Russo, Maria Teresa; Pozzi, Roberta; Franchini, Fabio; Giudetti, Guido; Uboldi, Chiara; Ponti, Jessica; Rossi, Francois; De Berardis, Barbara	Comparative study of ZnO and TiO2 nanoparticles: physicochemical characterisation and toxicological effects on human colon carcinoma cells	10.3109/17435390.2012.741724		Despite human gastrointestinal exposure to nanoparticles (NPs), data on NPs toxicity in intestinal cells are quite scanty. In this study we evaluated the toxicity induced by zinc oxide (ZnO) and titanium dioxide (TiO2) NPs on Caco-2 cells. Only ZnO NPs produced significant cytotoxicity, evaluated by two different assays. The presence of foetal calf serum in culture medium significantly reduced Zn…	anatase	A	25	< 25 nm		NS	Sigma- Aldrich Company Ltd.	Sigma		NS		NS	Nanoparticles were suspended both in ethanol and in serum-free culture medium to a final concentration of 0.1 mg/mL in a glass scintillation vial, probe-sonicated in ice for 20 min under temperature-controlled conditions, at100% amplitude	SONICATION	NS		NA/NS	Caco-2 cells	HUMAN - CACO-2		NA/NS		NA	6 and 24 h	24		h	1 and 2,5 ug/cm2	1	2.5	µg/cm2	DLS, ZetaPot, TEM, ICPMS	DLS; ICP-MS; TEM; Zeta potential		PDI= 0.335; main size peak around 770 nm and a secondary around to ~150 nm; Zav= 1080 nm; Zpot= –9.2b ± 0.5; the NPs size distribution in complete culture medium showed unsuitable results indicating NPs agglomerated/aggregated in suspensions. In the case of TiO2, we did not observe significant differences in ions leakage after 6 h of incubation or in the two considered cell culture conditions (wi…	100 - 500; 500 - 1000	yes	Ti in cells was measured by ICP-MS.	Positive (+)	No			yes	ROS
2019	Cai, Jie; Zang, Xinwei; Wu, Zezhong; Liu, Jianxin; Wang, Diming	Translocation of transition metal oxide nanoparticles to breast milk and offspring: The necessity of bridging mother-offspring-integration toxicological assessments	10.1016/j.envint.2019.105153		Although infant nanomaterial exposure is a worldwide concern, breastfeeding transfer of transition metal-oxide nanoparticles to as well as their toxicity to offspring are still unclear. Breastfeeding transmits nutrition and immunity from mothers to their offspring; it also provides a portal for maternal toxins to enter offspring. Thus, a toxicology assessment of both mothers and their offspring s…	anatase	A	50, 10 and 100	< 25 nm; 50-100 nm		NS	Zhonghang Nanometer Technology (Hefei, China)	Other		NS		NS	NPs were weighed accurately and diluted with a sterile saline solution to 50 mmol/L. The nanoparticle solutions were dispersed using an ultrasonic bath at a 40 kHz frequency for 30 min before administration	SONICATION	NS	ICR mice; lactating mice and offspring; liver, spleen, lungs, kidneys, intestine, brain, and mammary gland of offspring	MICE/RAT - LIVER/SPLEEN/LUNG/KIDNEY/GIT		NA/NS		NA/NS	oral gavage	Oral gavage	Lactating mice were exposed to the NP between lactating days 1 and 21, every day.		21	d	0.2 mmol/kg	0.2	0.2	mmol/kg	DLS, SEM	DLS; SEM		NPs in serum had relatively large hydrodynamic diameters compared to water	NS	yes	Tissue accumulation by ICP-MS and TEM	Positive (+)	No			No
2013	Mohamed, S.H.; Sayed, H.A.	Hazards of nanotechnology: Effect of titanium dioxide nanoparticles on the liver and renal cortex of albino rats. An electron microscopic study	10.1097/01.EHX.0000428980.13426.2d	https://www.scopus.com/inward/record.uri?eid=2-s2.0-84885799995&doi=10.1097%2f01.EHX.0000428980.13426.2d&partnerID=40&md5=a29fb805d2af23eac7a50194c84c4251	Introduction Exposure to titanium dioxide nanoparticles (TiO2 NPs) results from its wide use in the fields of medicine, industry, engineering, and environmental technology. Objectives To investigate the effect of administration of TiO2 NPs on the ultrastructure of the rat liver and renal cortex. Materials and methods Rats were subdivided into two groups: group A (served as control) and group B (T…	-	NS	21	< 25 nm		NS	Sigma-Aldrich	Sigma	35-65	< 50; 50-100		NS	TiO2 was suspended in PBS	OTHER	NS	Rats (male albino rats); liver and renal cortex	MICE/RAT - LIVER/KIDNEY		NA/NS		NA/NS	oral gavage	Oral gavage	daily dose for 90 days, sacrifice 24h or 12 months after last dose		90	d	5 mg/kg body weight	5	5	mg/kg		NS			NS	No			No			No
2017	Shahin, Nancy N.; Mohamed, Maha M.	Nano-sized titanium dioxide toxicity in rat prostate and testis: Possible ameliorative effect of morin	10.1016/j.taap.2017.08.014		This study investigated the effect of short-term oral exposure to nano-sized titanium dioxide (nTiO(2)) on Wistar rat prostate and testis, and the associating reproductive-related alterations. The study also evaluated the potential ameliorative effect of the natural flavonoid, morin, on nTiO(2)-induced aberrations. Intragastric administration of nTiO(2) (50 mg/kg/day for 1, 2 and 3 weeks) increas…	anatase	A	21	< 25 nm		NS	Sigma Aldrich	Sigma		NS		NS	It was suspended in saline, dispersed by ultrasonic vibration for 15 min	SONICATION	NS	Wistar rats; prostate gland and testes	MICE/RAT - TESTIS		NA/NS		NA/NS	intragastrically	Oral gavage	saline for 5 consecutive weeks + nTiO2 for 1, 2 and 3 weeks starting from the 29th, 22nd and 15th days of saline administration. Sacrificed 24h after last dose		21	d		50	50	mg/kg/day		NS			NS	No			No			Yes	GSH contents
2015	Chen, Zhangjian; Wang, Yun; Zhuo, Lin; Chen, Shi; Zhao, Lin; Luan, Xianguo; Wang, Haifang; Jia, Guang	Effect of titanium dioxide nanoparticles on the cardiovascular system after oral administration	10.1016/j.toxlet.2015.09.013		Titanium dioxide nanoparticles (TiO2 NPs) have been widely used in various consumer products, especially food and personal care products. Compared to the well-characterized adverse cardiovascular effect of inhaled ambient ultrafine particles, research on the health response to orally administrated TiO2 NPs is still limited. In our study, we performed an in vivo study in Sprague-Dawley rats to und…	anatase	A	24	< 25 nm	40.9, 149.3 and 168.1nm in H2O, artificial gastric juice (AGJ) and artificial intestinal juice (AIJ)	25-50 nm> 100 nm	Shanghai Aladdin Reagent Co., Ltd., China	Aladdin	63.95	50-100	11.1 mV (H2O), 4.7 mV (AGJ)and -13.7 mV (AIJ)	NEGATIVE; POSITIVE	dispersed in ultrapure water and sonicated for 15 min. In order to obtain homogenized suspension, the particle suspension was vortexed before every use	SONICATION	NS	Sprague-Dawley rats; blood and heart	MICE/RAT - BLOOD/HEART		NA/NS		NA/NS	oral gavage	Oral gavage	30 or 90 consecutive days		90	d	0, 2, 10, 50 mg/kg BW	2	50	mg/kg		NS			NS	No			No			No
2015	Setyawati, Magdiel I.; Tay, Chor Yong; Leong, David T.	Mechanistic Investigation of the Biological Effects of SiO2, TiO2, and ZnO Nanoparticles on Intestinal Cells	10.1002/smll.201403232		Silicon dioxide (SiO2), titanium dioxide (TiO2), and zinc oxide (ZnO) are currently among the most widely used nanoparticles (NPs) in the food industry. This could potentially lead to unintended exposure of the gastrointestinal tract to these NPs. This study aims to investigate the potential side-effects of these food-borne NPs on intestinal cells and to mechanistically understand the observed bi…	-	NS	Primary particle: 27.6 ± 6.7	25-50 nm	419.5nm (ultrapure water); PDI= 0.190; 265.5nm (DMEM); PDI= 0.172;	> 100 nm	Evonik Degussa (USA)	Evonik		NS	ζ-potential [mV] ((ultrapure water)= +21.4; ζ-potential [mV] (DMEM)= −14.1	NEGATIVE; POSITIVE	The dispersion of NPs in the DMEM was aided by sonication with a probe sonicator (Microson TM XL 2000, Qsonica, USA) for 1 min on ice prior to their introduction to the cells.	SONICATION	NP shape was observed with FETEM (2100F, JEOL, Japan) - spherical in shape with an average primary size of 27.6 ± 6.7 (TEM)	NA	NA/NS	intestinal cell lines:DLD-1, SW480 (human intestinal carcinoma epithelial cell lines) and NCM 460 (normal human intestinal mucosa epithelial cell line)	HUMAN - OTHER	NA	NA/NS		NA	12 or 24 h	24		h	62.5, 250, and 1000 μ M	62.5	1000	µM	NPs (20 μg mL −1 ) were dispersed in ultrapure water and complete DMEM. Following dispersion, the NP solutions in ultrapure water were left as is (designated as “ultrapure water” samples). Those that were dispersed in DMEM were spun down and washed three times with ultrapure water (21 000 g , 30 min). After centrifugation, the NPs were collected and re-dispersed back in ultrapure water (designate…	DLS; Zeta potential		Not Done	NS	No			No		Not Done	Yes	ROS measurments with DCFH-DA,10 μ M, for 12h
2013	Al-Rasheed, Nouf M.; Faddah, L. M.; Mohamed, Azza M.; Baky, Nayira A. Abdel; Al-Rasheed, Nawal M.; Mohammad, Raeesa A.	Potential Impact of Quercetin and Idebenone against Immuno- inflammatory and Oxidative Renal Damage Induced in Rats by Titanium Dioxide Nanoparticles Toxicity	10.5650/jos.62.961		The aim of this study was to investigate the toxic impacts of titanium dioxide nanop articles (TiO2-NPs) on rat kidneys and the possible prophylactic role of either quercetin or idebenone. TiO2-NPs were administered orally at either 600 mg or 1 g/kg body weight for 5 consecutive days to evaluate dose-dependent toxicity referred to the OECD guidelines for testing of chemicals. The results showed t…	-	NS	< 100 nm	< 25 nm; 25-50 nm; 50-100 nm	NA	NS	Sigma CO (USA)	Sigma		NS		NS	suspended in 1% Tween 80 and dispersed by ultrasonication vibration for 15min	SONICATION	NS	male albino rats, OECD No. 420 acute oral toxicity fixed dose method. Kidney Organ and serum	MICE/RAT - KIDNEY	NA	NA/NS	NA	NA/NS	Assuming gavage consideringthat it is the proposed in the test guide, but not specificed in the article.	Oral gavage	5 consecutive days		5	d	CLASS I - 600mg/kg body weight/day, for 5 consecutive days; CLASS II - 1g/kg body weight/day,for 5 consecutive days; Addditonal co- administration of quercetin e idebenone in both classes for some grups	0.6	1	g/kg/day	not done	NS		not done	NS	No			No		not done	Yes	Nitric Oxide and Renal GSH content
2020	Murugadoss, Sivakumar; Brassinne, Frederic; Sebaihi, Noham; Petry, Jasmine; Cokic, Stevan M; Van Landuyt, Kirsten L; Godderis, Lode; Mast, Jan; Lison, Dominique; Hoet, Peter H; van den Brule, Sybille	Agglomeration of titanium dioxide nanoparticles increases toxicological responses in vitro and in vivo	10.1186/s12989-020-00341-7	https://pubmed.ncbi.nlm.nih.gov/32101144	BACKGROUND: The terms agglomerates and aggregates are frequently used in the regulatory definition(s) of nanomaterials (NMs) and hence attract attention in view of their potential influence on health effects. However, the influence of nanoparticle (NP) agglomeration and aggregation on toxicity is poorly understood although it is strongly believed that smaller the size of the NPs greater the toxic…	both anatase	A	Two TiO2 with primary particle 17 and 117 nm	< 25 nm; >100 nm	17 nm-SA: Z-average 600, PDI 0,34 (0h);Z-average 600, PDI 0,35 (24h); 17 nm-LA:Z-average 900, PDI 0,42 (0h);Z-average 800, PDI 0,40 (24h); 117 nm-SA Z-average 280, PDI 0,18 (0h);Z-average 290, PDI 0,19 (24h); 117 nm-LA Z-average 580, PDI 0,36 (0h);Z-average 590, PDI 0,37 (24h);	> 100 nm	European Commission’s Joint Research Centre (JRC, Italy) JRCNM10202a (NM102) and JRCNM10200a.	JRC		NS		NS	To obtain small (SA) and large agglomerates (LA), 17 and 117nm TiO2 were dispersed at different pH conditions (ph2 and ph 7.5), sonicated and stabilized with BSA 0.25%. The suspensions dispersed at pH 2 were readjusted to pH 7-7.5 using 0.1M NaOH. After dispersing the particles in the respective pH solutions , the suspensions were sonicated, delivering 7056 J with a probe sonicator (Microson XL 2…	SONICATION	Transmission Electron microscopy (TEM) after dispersion in different ph solutions: The 17 nm sized TiO2 at pH 2 was relatively well dispersed and predominantly existed as small aggregates (indicated as 17 nm-SA) compared to the suspension prepared at pH 7.5, in which particles tend to agglomerate strongly (17 nm-LA). In contrast, 117 nm TiO2 were found to be less agglomerated when dispersed at pH…	C57BL/6JRj mice Blood, broncho-alveolar lavage and organ sampling (lung and liver)	MICE/RAT - LIVER/LUNG	human bronchial epithelial (HBE), colon epithelial (Caco2) and monocytic (THP-1)	HUMAN - CACO-2/THP-1/HBE	NA	NA/NS	in vivo: oropharyngeal aspiration or oral gavage	Oral gavage	in vitro: 24 h		1	d	in vitro: 4 to 256 μg/ mL (5, 25, 50 and 100 μg/mL for comet assay); 50 µg/mL of TiO2 (uptake) in vivo: 50 μl suspension of particles or suspension medium at pH 7.5 (controls) oropharyngeal aspiration in vivo:	4 (in vitro) 50 (in vivo)	256 (in vitro) 50 (in vivo)	µg/mL µL	Volume Centrifugation Method (VCM) was used to determine the effective density of TiO2 NPs in cell culture medium (CCM) and the dose delivered to the cells over 24 h exposure was simulated using a Distorted Grid (DG) model, DLS	DLS		DLS - DMEM/F12 (HBE) 17 nm-SA: Z-average 670, PDI 0,27 (0h);Z-average 850, PDI 0,24 (24h); 17 nm-LA:Z-average 900, PDI 0,27 (0h);Z-average 980, PDI 0,20 (24h); 117 nm-SA Z-average 690, PDI 0,19(0h);Z-average 750, PDI 0,20 (24h); 117 nm-LA Z-average 630, PDI 0,26 (0h);Z-average 650, PDI 0,021 (24h); DLS - DMEM/HG (Caco2) 17 nm-SA: Z-average 630, PDI 0.31(0h);Z-average 1580, PDI 0.28(24h); 17 nm-LA…	< 100; 100 - 500	yes		Positive (+)	No			Yes	in vitro: total glutathione depletion using GSH detection kit was measured as an indicator of oxidative stress in HBE and Caco2 in vivo: GSH was quantified according to manufacturer’s protocol and the protein content of cell cultures was assessed using bicinchoninic acid (BCA) protein assay kit in lung and liver
2019	Dorier, Marie; Beal, David; Tisseyre, Celine; Marie-Desvergne, Caroline; Dubosson, Muriel; Barreau, Frederick; Houdeau, Eric; Herlin-Boime, Nathalie; Rabilloud, Thierry; Carriere, Marie	The food additive E171 and titanium dioxide nanoparticles indirectly alter the homeostasis of human intestinal epithelial cells in vitro	10.1039/c8en01188e		Environmental contamination with TiO2 and the use of TiO2 as a food additive (E171) or in cosmetics result in human exposure to TiO2 via inhalation, ingestion, and through skin contact. When inhaled, most TiO2 particles are cleared via the mucociliary escalator and are then swallowed. Together with the ingestion of E171, this process results in a significant exposure of the human gastro-intestina…	TiO2-NPs, either pure anatase (12nm) or mixed anatase/rutile (P25, 25nm), or to E171.	A; M	E171 - primary diameter: 119 nm, with 47% of the particles (by number) having a diameter <100 nm; A12 - 12nm P25 - 21nm	< 25 nm; 25-50 nm; 50-100 nm; >100 nm	E171 - hydrodynamic diameter in water was 415.4 ± 69.5 nm (polydispersity index: 0.48 ± 0.071); Other nm information in other articles of the same authors	> 100 nm	E171 (from a French commercial source); P25 TiO2-NPs ( NM105 from the Joint Research Center's (JRC) nanomaterial library), or A12 TiO2- NPs, pure anatase, 12 nm (produced in the authors laboratory)	JRC	E171 - 9.4 m2 g−1 Other nm information in other articles of the same authors	< 50		NS	suspended in ultrapure sterile water and dispersed using an indirect cup-type sonicator (Vibracell 75041, Bioblock Scientific), operated in continuous mode for 30 min at 80% amplitude, and maintaining the temperature at 4 °C.	SONICATION	previous reported by the authors	NO	NA/NS	Co-culture Caco-2 and HT29-MTX cells, in a ratio of 70 : 30 Caco-2 : HT29-MTX Caco-2 cells were also grown as a mono-culture	HUMAN - CACO-2/HT29-MTX	NA	NA/NS		NA	Two exposure scenarii were used: acute exposure for 6 h or 48 h after cell differentiation (21 days post-seeding), or repeated exposure during the course of cell differentiation, i.e., twice a week for 21 days post-seeding.	NS		h	10 or 50 μg mL−1. Differentiated cells were exposed for 6 h or 48 h to 50 μg per mL of particles, after dilution in complete cell culture medium, at pH 7.4. For the chronic (repeated) exposure experiments, two days after seeding, the cell culture medium was replaced by a suspension of TiO2 particles prepared in complete cell culture medium. Depending on the experiment, the TiO2 concentration was …	10	50	µg/mL	not mentioned in the present article	NS		Exposure medium: Dulbecco's modified Eagle medium + GlutaMAX™ + 10% FBS E171 - 739.3 ± 355.3 nm in the exposure medium (polydispersity index: 0.64 ± 0.221) as the particles agglomerated)	500 - 1000	No			No		Not Done	No
2019	Chakrabarti, Srijita; Goyary, Danswrang; Karmakar, Sanjeev; Chattopadhyay, Pronobesh	Exploration of cytotoxic and genotoxic endpoints following sub-chronic oral exposure to titanium dioxide nanoparticles	10.1177/0748233719879611		Health hazards of titanium dioxide nanoparticles (TiO2-NPs) have raised severe concerns because of the paucity of information regarding the toxic effects among the population. In the present research, the in vitro and in vivo cytotoxic potential of TiO2-NPs were evaluated using flow cytometric techniques. Further, in vitro and in vivo genotoxic endpoints were estimated by means of comet, micronuc…	-	NS	The SEM analysis of TiO2-NPs revealed the spherical, smooth, homogenous, and uniform structure . The average diameter was found to be 58.25+ 8.11 nm.	50-100 nm	Not Done	NS	Sigma-Aldrich Chemical Co.	Sigma		NS		NS	NS	NS	NS	Albino mice (M/F) Serum for biochemistry; whole blood to estimate various blood parameters; lungs, heart, liver, and kidneys were collected, washed with normal saline, and weighed. Liver and kidneys were subjected to histological evaluation	MICE/RAT - LIVER/KIDNEY/LUNG/HEART	murine RAW 264.7 cells	MURINE - OTHER	No	NA/NS	Oral Exposure ( Sub-chronic oral toxicity test (Teste Guide OECD No 408)	Peroral exposure	In vitro analysis was performed at the concentration range of 10–100 mg/mL using murine RAW 264.7 cells, for 24h In vivo experiments were conducted on Albino mice (M/F) by exposing them to 200 and 500 mg/kg TiO2-NPs for 90 days.		1	d	in vitro: 10, 25, 50, 75 ug/mL; in vivo: 200mg; and 500mg/ml	10 (in vitro) 200 (in vivo)	75 (in vitro) 500 (in vivo)	µg/mL mg/mL		NS			NS	No			No			No
2012	Nogueira, Carolina Maciel; de Azevedo, Walter Mendes; Zaidan Dagli, Maria Lucia; Toma, Sergio Hiroshi; de Arruda Leite, Andre Zonetti; Lordello, Maria Laura; Nishitokukado, Ieda; Ortiz-Agostinho, Carmen Lucia; Seixas Duarte, Maria Irma; Ferreira, Marcelo Alves; Sipahi, Aytan Miranda	Titanium dioxide induced inflammation in the small intestine	10.3748/wjg.v18.i34.4729		AIM: To investigate the effects of titanium dioxide (TiO2) nanoparticles (NPTiO2) and microparticles (MPTiO2) on the inflammatory response in the small intestine of mice. METHODS: BI 57/6 male mice received distilled water suspensions containing TiO2 (100 mg/kg body weight) as NPTiO2 (66 nm), or MPTiO2 (260 nm) by gavage for 10 d, once a day; the control group received only distilled water. At th…	uncoated anatase TiO2 microparticles (MPTiO2);uncoated mostly anatase Tio2 nanoparticle (NPTiO2 )	A	nanoparticle - NPTiO2 (66 nm), microparticle - MPTiO2 (260 nm)	50-100 nm; >100 nm	dynamic light scattering Nanotrac but no information given.	NS	MPTiO2 - Evonik Degussa (Kronos® 1171) NPTiO2 - in house	Evonik		NS		NS	TiO2 particles were suspended in 500 μL of distilled water, mixed and sonicated immediately before being administered to animals to minimize particle aggregation.	SONICATION	NS	Bl 57/6 male mice;duodenum, jejunum and ileum for assessment of cytokines, inflammatory cells and titanium content.	MICE/RAT - GIT	NA	NA/NS	No	NA/NS	Gavage	Oral gavage	10 days, once a day		10	d	distilled water suspensions containing TiO2 100 mg/kg body weight	100	100	mg/kg	NA	NA		NA	NS	No			No	ICP-MS		No
2016	Jo, Mi-Rae; Yu, Jin; Kim, Hyoung-Jun; Song, Jae Ho; Kim, Kyoung-Min; Oh, Jae-Min; Choi, Soo-Jin	Titanium Dioxide Nanoparticle-Biomolecule Interactions Influence Oral Absorption	10.3390/nano6120225		Titanium dioxide (TiO2) nanoparticles (NPs) have been widely applied in various industrial fields, such as electronics, packaging, food, and cosmetics. Accordingly, concerns about the potential toxicity of TiO2 NPs have increased. In order to comprehend their in vivo behavior and potential toxicity, we must evaluate the interactions between TiO2 NPs and biomolecules, which can alter the physicoch…	TiO2 NPs, food grade (f-TiO2) - anatase general grade (g-TiO2) - anatase	A	Particle size and morphology were examined by scanning electon microscopy (SEM):Both NPs had round, but irregular particle morphologies. f-TiO2 - 117 ± 41 nm; g-TiO2 - 153 ± 49 nm;	> 100 nm	Zeta potential and hydrodynamic radii of the NPs in aqueous suspension: g-TiO2 showed partial formation of agglomerates compared with f-TiO2. f-TiO2 - 438 nm; PDI 0.398 g- TiO2 543 nm; PDI 0.479 TiO2 NPs were dispersed in 1% (w/v) solution of either albumin or glucose (0, 2, 6, 24 and 48 h with light scattered electrophoresis): in presence of 1% glucose: f-TiO2 - 1075nm; g- TiO2 1749 nm; in prese…	> 100 nm	*Food grade TiO2 NP (f-TiO2) - Avantor Performance Materials Inc. (Center Valley, PA, USA) *general grade TiO2 NP (g-TiO2) - Alfa Aesar Johnson Matthey Co. (Karlsruhe, Germany)	Other		NS	f-TiO2 - -25 mV g-TiO2 -37 mV. After addition of 1% glucose zeta potentials shifted toward 0 No modification after addition of 1% albumin	NEGATIVE	NS	NS	solubilities of f-TiO2 and g-TiO2 in simulated gastric fluid were 0.06% +- 0.03% and 0.05% +- 0.03%, respectively, which were fairly low and not significantly different from each other; In vivo solubilities in gastric fluid after a single-dose administration of 500 mg/kg via oral gavage to rats (the same dose used for the biokinetic study), were 0.05% -+ 0.03% and 0.08%+-_x0006_ 0.05% for f-TiO2 …	Five-week old male Sprague Dawley (SD) rats; blood samples via the tail vein at several time points (0, 0.5, 1, 2, 3, 4, 6 and 10 h); for tissue distribution and excretion kinetic studies - kidneys, liver, lungs, and spleen at different time points (6 h, and 1, 2 and 3 days)	MICE/RAT - LIVER/KIDNEY/LUNG/SPLEEN	3-dimensional culture systems: vitro model of human intestinal FAE, representing M cells; Human intestinal epithelial Caco-2 cells: non-adherent human Burkitt’s lymphoma Raji B cells	HUMAN - CACO-2/RAJIB	No	NA/NS	oral gavage	Oral gavage	in Vivo: single-dose oral		NS	d	in vivo: 500 mg/kg TiO2 NPs	500	500	mg/kg		NS			NS	No			Yes	n vitro 3D cell culture system of a FAE model, by co-culturing human intestinal epithelial Caco-2 cells and human Raji B lymphocytes.:	Negative (mostly)	No
2014	Brun, Emilie; Barreau, Frederick; Veronesi, Giulia; Fayard, Barbara; Sorieul, Stephanie; Chaneac, Corinne; Carapito, Christine; Rabilloud, Thierry; Mabondzo, Aloise; Herlin-Boime, Nathalie; Carriere, Marie	Titanium dioxide nanoparticle impact and translocation through ex vivo, in vivo and in vitro gut epithelia	10.1186/1743-8977-11-13		Background: TiO2] particles are commonly used as dietary supplements and may contain up to 36% of nano-sized particles (TiO2-NPs). Still impact and translocation of NPs through the gut epithelium is poorly documented. Results: We show that, in vivo and ex vivo, agglomerates of TiO2-NPs cross both the regular ileum epithelium and the follicle-associated epithelium (FAE) and alter the paracellular …	95% anatase TiO2 nanopowder	A	mean grain size was 12 ± 3 nm, as measured by TEM	< 25 nm	Water: 132 nm, PDI 0.188 Gastric: 218.4 ± 2.9, PDI 0,333; Intestinal: > 1000; PDI >0.5;	> 100 nm	produced in their laboratories	Other		NS	20.0 mV	POSITIVE	NPs suspensions (10 mg/mL) were prepared in ultrapure sterile water by high-power pulsed sonication (Vibra Cell 75043, 20 kHz, Bioblock scientific, 28% amplitude, 1s on/1s off, 4°C) using a 13 mm probe.	SONICATION	NS	Mice	MICE/RAT	monoculture caco 2; Caco-2/HT29 MTX; Caco-2/RajiB lymphocytes	HUMAN - CACO-2/HT29-MTX/RAJIB	No	NA/NS	a single in vivo gavage of NPs suspended in water.	Oral gavage	ex vivo and in vivo gut tissues were exposed to TiO2-NPs for 2 h and 6 h, respectively while in vitro models were exposed for 6-48 h. cytotoxicity: 0 to 500 μg/mL of NPs up to 48 h.		NS	d	in vivo: 12.5 mg/kg of TiO2-NPs dispersed in 150 μl of water; ex vivo: 50 μg/ml NPs prepared in Ringer solution to which 10% (v/v) FBS was added. This suspension was continuously circulated in the Ussing chamber for 2 h, under oxygenation. Ileum and Peyer’s patches were then rinsed and prepared for imaging experiments.	12,5 (in vivo) 50 (ex vivo)	12,5 (in vivo) 50 (ex vivo)	mg/kg µg/mL	DLS	DLS		ex vivo : Ringer + FBS: Z-average (352.0 ± 0.9nm); PDI 0.298; ζ (−13.2 ± 1.2mV) in vitro: cDMEM Z-average (320.5 ± 1.8); PDI 0.290; ζ (−10.8 ± 0.6mV) stability in serum containing cell culture medium: 0h: Z-average (320.5 ± 1.8); PDI 0.290; ζ (−10.8 ± 0.6mV) 24h: Z-average (332.4); PDI 0.260; ζ (−11.5 ± 0.3mV) 48h: Z-average (323.5); PDI 0.280; ζ (−10.3 ± 0.5mV)	100 - 500	yes	μPIXE and TEM- EDX	Positive (+)	Yes	imaged the gut sections by μPIXE; in situ X-ray absorption spectroscopy analyses (XAS) of the Ti-rich regions detected in μXRF images; in vitro TEM	Positive	No
2017	Cabellos, Joan; Delpivo, Camilla; Fernandez-Rosas, Elisabet; Vazquez-Campos, Socorro; Janer, Gemma	Contribution of M-cells and other experimental variables in the translocation of TiO2 nanoparticles across in vitro intestinal models	10.1016/j.impact.2016.12.005		The prediction of nanomaterial (NM) intestinal absorption is a key step in the evaluation of risks after oral exposure. The Caco-2 monolayer model is widely used to predict the permeability of substances across the intestinal barrier. The addition of M-cells should improve the relevance of the model for NMs, since transcytosis through M-cells is considered to play a major role in the intestinal a…	anatase (79%) and rutile (21%).	M	spherical with a diameter of 18±8 nm	< 25 nm	DLS:For sonication protocol A, the Z-average values obtained right after preparation of the working solution at 0.1 mg/mL were around 1.5-fold larger than those obtained for sonication protocol B (338 nm vs. 229 nm, respectively). Particle size distribution curves showed a main size population peak centered at 396 and 295 nm, for sonication protocol A and B respectively	> 100 nm	L'Urederra (Spain) in powder form.	Other	89.8m2/g, with a porosity of 0.0372 cm3/g	50-100		NS	two different NP dispersion protocols (probe sonication for different periods and amplitude in in MiliQ water (at 2 mg/mL): Protocol A: 3mm x 80 mm probe Time: 1 minute Amplitude: 40% Protocol B: 6mm x 80 mm probe Time: 15 minute Amplitude: 20%	SONICATION	NS	No	NA/NS	The translocation of TiO2 nanoparticles (NPs) was evaluated in the Caco-2/Raji B cells (M-cell system) and compared to that in a Caco-2 monolayer model.	HUMAN - CACO-2/RAJIB	No	NA/NS		NA	two different co-incubation periods (co-culture day 4 vs. co-culture day 7) Exposure Twenty-four and 48 h	NS		h	0.1 mg/mL dispersion	0.1	0.1	mg/mL		NS			NS	No			Yes	TEER	Negative The levels of titanium detected in the basal compartment of the wells with cell-free insert membranes during the 48 hour-period (sum of values at 24 h and 48 h) corresponded approximately to half of the titanium added to the apical compartment. This indicates that the titaniumdioxide nanoparticles couldmove through the cell-free insert membranes. No differences between the two sonication…	No
2014	Janer, G.; Mas del Molino, E.; Fernandez-Rosas, E.; Fernandez, A.; Vazquez-Campos, S.	Cell uptake and oral absorption of titanium dioxide nanoparticles	10.1016/j.toxlet.2014.04.014		Large efforts are invested on the development of in vitro tests to evaluate nanomaterial (NM) toxicity. In order to assess the relevance of the adverse effects identified in in vitro toxicity tests a thorough understanding of the biokinetics of NMs is critical. We used different in vitro and in vivo test methods to evaluate cell uptake and oral absorption of titanium dioxide nanoparticles (TiO2 N…	-	NS	spherical and had a size range of 18 ± 8 nm.	< 25 nm		NS	L’Urederra (Spain) under the framework of the EUproject Nanopolytox.	Other	9.8 m2/g and the poros-ity was 0.0372 cm3/g with a porus diameter of 12.9 nm	< 50		NS	in vitro:NMs were dispersed with a tip sonicator (SONICSVCX 750; Braun) equipped with a standard ¼_x0004__x0004_(6,5 mm) × 5.6”(142 mm) tapered microtip (783630-0420; Izasa) at 1 mg/mL for15 min without pauses, applying a power of 400 W. TiO2NPs were dispersed in the cell culture media (at 1 mg/mL)by horn sonication during 15 min using a Labsonic sonicator(BBraun) operated in continuous mode at 6…	SONICATION	NS	Sprague-Dawley male rats spleen, liver, small andlarge intestines, and mesenteric lymph nodes were removed	MICE/RAT - LIVER/SPLEEN/GIT/LIMPH	Caco-2	HUMAN - CACO-2	No	NA/NS	oral gavage	Oral gavage	in vitro:24 and 48h		2	d	in vitro:100 _x0002_ug/mL in vivo:100 mg/Kg by oral gavage in a volume of 10 mL/Kg)	100 (in vitro) 100 (in vivo)	100 (in vitro) 100 (in vivo)	µg/mL mg/kg	dynamic light scattering (DLS)	DLS		The hydrodynamic diameter (Z-average) in DMEM, as used inthe in vitro studies, was 270 nm for a dispersion at 0.1 mg/mL and367 nm for a dispersion at 1 mg/mL. In sodium citrate as used forthe oral administrations, the hydrodynamic diameter was 202 nmat 1 mg/mL and 117 at 10 mg/mL.	100 - 500	No			YEs		Negative	No
2017	Chen, Hanqing; Zhao, Ruifang; Wang, Bing; Cai, Chengxu; Zheng, Lingna; Wang, Hailong; Wang, Meng; Ouyang, Hong; Zhou, Xiaoyan; Chai, Zhifang; Zhao, Yuliang; Feng, Weiyue	The effects of orally administered Ag, TiO2 and SiO2 nanoparticles on gut microbiota composition and colitis induction in mice	10.1016/j.impact.2017.07.005		Nanotechnology offers significant potential benefits to many fields, including food and agricultural industries, which have opportunities to provide products to the general public that could result in ingested nanoparticles (NPs). Herein, we explored the possible impacts of orally administered TiO(2)NPs, SiO(2)NPs and AgNPs on gut microbiota composition and colitis induction in mice. We administe…	anatase	A	16.8 ± 1.8 nm	< 25 nm	Foi feito mas não consigo aceder à informação porque apenas obtive um manuscrito por ser submetido	NS		NS		NS		NS	NS	NS	NS	Male CD-1 (ICR) mice The experimental colitis model was established by oral administration of dextran sulfate sodium (3% DSS) to the ICR mice.	MICE/RAT - GIT	No	NA/NS	No	NA/NS		Peroral exposure	7 days		7	d	2.5 mg/kg bw/day for 7 days	2.5	2.5	mg/kg/day		NS			NS	No			No			No
2018	Morgan, Ashraf; Ibrahim, Marwa A.; Galal, Mona K.; Ogaly, Hanan A.; Abd-Elsalam, Reham M.	Innovative perception on using Tiron to modulate the hepatotoxicity induced by titanium dioxide nanoparticles in male rats	10.1016/j.biopha.2018.04.064		The extensive application of titanium dioxide nanoparticles (TiO2 NPs) in the food industry arouses a debate regarding the probable risk associated with their use. Several recent studies reported that most nanoparticles (NPs) have adverse actions on the liver. The objective of this study is to examine whether Tiron plays a modulatory role against apoptotic damage induced by TiO2 NPs in rat livers…	Anatase	A	10 nm	< 25 nm		NS	Sigma Aldrich Chemical Co., Germany	Sigma	> 150m2/g	> 100		NS	Nanosized TiO2 was suspended in a phosphate-buffered saline solution (PBS) at a concentration of 1 mg/ml, shaken and dispersed via sonication for 10 min before use	SONICATION	NS	male albino rats	MICE/RAT	No	NA/NS	No	NA/NS	orally administered	Peroral exposure	60 days		60	d	*an oral dose of 100 mg/kg bw/day (intoxicated group) *100 mg/kg bw/day for 60 days and 470 mg/kg bw/day of Tiron during the last 14 days of the experimental period (Treated group) *470 mg/kg bw/day of Tiron during the last 14 days of the experimental period (Tiron group)	100	470	mg/kg/day		NS			NS	No			No			Yes	MDA , superoxide dismutase (SOD) activity , reduced glutathione (GSH) concentration, and glutathione peroxidase enzyme (GPx) activity
2013	McCracken, Christie; Zane, Andrew; Knight, Deborah A.; Dutta, Prabir K.; Waldman, W. James	Minimal Intestinal Epithelial Cell Toxicity in Response to Short- and Long-Term Food-Relevant Inorganic Nanoparticle Exposure	10.1021/tx400231u		Toxicity of commercial nanoparticles of titania, silica, and zinc oxides is being investigated in this in vitro study. Particles of these compositions are found in many food items, ea and thus this study is directed toward particle behavior in 50 simulated digestion media and their interaction with intestinal epithelial cell line C2BBe1, a clone of Caco-2 cells, originally isolated from a human c…	mixture of anatase and rutile (XRD)	M	21 nm (~ 20 - 25 nm) TEM	< 25 nm		NS	Sigma-Aldrich (St. Louis, MO), trade name Aeroxide P25.	Sigma		NS	35-65 m2/g, and purity of ≥ 99.5%,	POSITIVE	NS	NS	NS	NO	NA/NS	epithelial cell line C2BBe1, a clone of Caco-2 cells	HUMAN - CACO-2		NA/NS		NA	24 hours.	24		h	10 μg/cm2	10	10	µg/cm2	DLS - DMEM/FBS - 115 ± 2nm; -11 ± 1mV	DLS		DLS - DMEM/FBS - 115 ± 2nm; -11 ± 1mV Pepsin 119 ± 2nm; +14 ± 2mV Pancreatin 110 ± 0nm; -39 ± 2mV Bile Salts - 104 ± 2nm ; -35 ± 1mV	100 - 500	Yes	TEM	Positive (+)	No			No
2011	Sycheva, Lyudmila P.; Zhurkov, Vjacheslav S.; Iurchenko, Valentina V.; Daugel-Dauge, Natalia O.; Kovalenko, Maria A.; Krivtsova, Elena K.; Durnev, Andrey D.	Investigation of genotoxic and cytotoxic effects of micro- and nanosized titanium dioxide in six organs of mice in vivo	10.1016/j.mrgentox.2011.07.010		Titanium dioxide is manufactured worldwide in large quantities for use in a wide range of applications including as food additives, in cosmetics and pigments for coloring ingested and externally applied drugs. Although TiO2 is chemically inert it can cause negative health effects, such as lung cancer in rats. However, the mechanisms involved in TiO2-induced genotoxicity and carcinogenicity have n…	anatase	A	microsized, TDM, 160 nm; nanosized, TDN, 33 nm)	25-50 nm; >100 nm		NS	commercial products “Titanium dioxide” (TDM) and “Titanium dioxide, simethicone” (TDN) produced by Sensient Cosmetic Technologies LCW (France) and marketed in Russia as cosmetic ingredients for the personal care industry	Sensient		NS		NS	NS	NS	NS	CBAB6F1 mice cells of brain, liver and bone marrow ( Comet assay) cells of bone marrow, forestomach, colon and testis with a poly-organ karyological assay (analysis of micronuclei, nuclear protrusions, atypical nuclei, multinucleated cells, mitotic and/or apoptotic index).	MICE/RAT - LIVER/BONE MARROW/BRAIN/GIT	No	NA/NS	NO	NA/NS	oral gavage	Oral gavage	daily for seven days.		7	d	doses of 40, 200 and 1000 mg/kg bw, Dosing was made by oral gavage with volume of suspension 10 ml/kg of mouse weight.	40	1000	mg/kg		NS			NS	No			No			No
2019	Chen, Zhangjian; Zhou, Di; Han, Shuo; Zhou, Shupei; Jia, Guang	Hepatotoxicity and the role of the gut-liver axis in rats after oral administration of titanium dioxide nanoparticles	10.1186/s12989-019-0332-2		Background Due to its excellent physicochemical properties and wide applications in consumer goods, titanium dioxide nanoparticles (TiO2 NPs) have been increasingly exposed to the environment and the public. However, the health effects of oral exposure of TiO2 NPs are still controversial. This study aimed to illustrate the hepatotoxicity induced by TiO2 NPs and the underlying mechanisms. Rats wer…	spherical anatase crystals with a purity of 99.90%.	A	29 ± 9 nm(SEM)	25-50 nm	Water: ~50nmPDI=0,261; zeta potencial~12mV	25-50 nm	Shanghai Macklin Reagent Co. Ltd., China	Other	77.51m2/g.(BET)	50-100		NS	The TiO2 NPs were dispersed in ultrapure water and sonicated for 15 min. To obtain homogenized suspension, the particle suspension was vortexed before every use.	SONICATION	NS	Sprague-Dawley (SD) rats	MICE/RAT	NO	NA/NS	No	NA/NS	gavage	Oral gavage	daily for 90 days		90	d	0, 2, 10, 50 mg/kg in in a volume of 1 mL	2	50	mg/kg	To characterize TiO2 NPs in the exposure medium and rat gastrointestinal tract, the hydrodynamic diameter and zeta potential of TiO2 NPs (1mg/mL) in ultrapure water (H2O), artificial gastric juice (AGJ), and artificial intestinal juice (AIJ) were tested	DLS; Zeta potential		em gráficos mas difícil de vizualizar artificial gastric juice (AGJ): ~100nm PDI=0,002; zeta potencia~5mV artificial intestinal juice (AIJ):~300nm PDI=0,162 ~-13mV	100 - 500	No			No			Yes	oxidative stress biomarkers
2015	Vasantharaja, Dasal; Ramalingam, Venugopal; Reddy, Gaddam Aadinaath	Oral toxic exposure of titanium dioxide nanoparticles on serum biochemical changes in adult male Wistar rats	10.7508/NMJ.2015.01.005		Objective(s): Titanium dioxide (TiO2) nanoparticles (NPs) are widely used in commercial food additives and cosmetics worldwide. Uptake of these nanoparticulate into humans by different routes and may exhibit potential side effects, lags behind the rapid development of nanotechnology. Thus, the present study designed to evaluate the toxic effect of mixed rutile and anatase TiO2 NPs on serum bioche…	mixture of rutile and anatase TiO2 NPs	M	particle size <100 nm and its purity 99.5 % trace metal basis	< 25 nm; 25-50 nm; 50-100 nm		NS	Sigma-Aldrich chemicals Co. (St, Louis, MO 63103, USA)	Sigma		NS		NS	NPs were suspended in 0.9% saline and that suspension was sonicated for 10 min before the treatment.	SONICATION	NS	adult male Wistar rats Blood samples	MICE/RAT - BLOOD		NA/NS		NA/NS	orally administered through intragastric oral intubation tube	Oral gavage	14 consecutive days		14	d	50 and 100 mg/kg body weight of TiO2 NPs	50	100	mg/kg		NS			NS	No			No			No
[truncated: 25 more columns]
