# Supplementary material for: Adverse Outcome Pathways Associated with the Ingestion of Titanium Dioxide Nanoparticles—A Systematic Review
Source: Nanomaterials (Basel). 2022 Sep 21;12(19):3275. doi: 10.3390/nano12193275 (PMC9565478; doi:10.3390/nano12193275)
Supplement: Supplementary file 1 [file nanomaterials-12-03275-s001.zip › Table S6.pdf]

**Table S6:** Studies reporting modifications of biochemical parameters after exposure to of TiO<sub>2</sub>-NPs.

| Reference                     | Animals                           | Biological sample       | Biochemical Parameters                                 | Conclusions                                                                                                                                                                                                                                                                                                                                                                       |
|-------------------------------|-----------------------------------|-------------------------|--------------------------------------------------------|-----------------------------------------------------------------------------------------------------------------------------------------------------------------------------------------------------------------------------------------------------------------------------------------------------------------------------------------------------------------------------------|
| <b>Liver function</b>         |                                   |                         |                                                        |                                                                                                                                                                                                                                                                                                                                                                                   |
| Wang et al. (2007) [184]      | CD-1 (ICR) mice                   | Blood (Serum)           | ALP, ALT, AST, TBIL                                    | No significant differences for ALP, AST and TBIL. ALT and ratio ALT/AST significantly higher in TiO <sub>2</sub> 25 nm group indicating liver toxicity.                                                                                                                                                                                                                           |
| Bu et al. (2010) [40]         | Wistar rats                       | Blood (Serum)           | ALT, AST, CHOL, TBIL, TG                               | TiO <sub>2</sub> significantly increases AST serum levels. Liver damage may occur after repeated oral administration of TiO <sub>2</sub> NPs.                                                                                                                                                                                                                                     |
| Chen et al. (2015) [185]      | Sprague-Dawley rats (3 weeks old) | Blood (Serum)           | ALB, GLB, ALB/GLB ratio, ALT, AST, ALT/AST ratio, TBIL | Exposure to TiO <sub>2</sub> NPs (10 and 50 mg/kg bw/day) significantly increased GLB serum levels and decreased TBIL serum levels. The co-exposure to glucose caused additionally the significant decrease of ALT, AST and ALB/GLB ratio. Possible liver damage.                                                                                                                 |
| Azim et al. (2015) [78]       | Albino mice (male)                | Blood (Serum)           | ALT, AST                                               | Exposure to TiO <sub>2</sub> NPs increased significantly the ALT and AST serum levels, compared to the control group. Treatment with idebenone, carnosine, vitamin E and their combination exhibited a significant reduction in liver function enzyme activities as compared to TiO <sub>2</sub> NPs group. This reduction reflected the hepatoprotective effect of these agents. |
| Natarajan et al. (2015) [119] | Sprague-Dawley rats (male)        | Primary rat hepatocytes | ALB, BUN                                               | Exposure to TiO <sub>2</sub> demonstrated a concentration and type dependent loss in urea and albumin synthesis function of hepatocytes.                                                                                                                                                                                                                                          |

|                                   |                                   |               |                                |                                                                                                                                                                                                                                                                                                                                                                                                                                                            |
|-----------------------------------|-----------------------------------|---------------|--------------------------------|------------------------------------------------------------------------------------------------------------------------------------------------------------------------------------------------------------------------------------------------------------------------------------------------------------------------------------------------------------------------------------------------------------------------------------------------------------|
| Yang et al. (2017) [56]           | C57/BL6 mice (5-7 week old)       | Blood (Serum) | ALP, ALT, AST, DBIL, IBIL, TBA | Exposure to 500 mg/kg/day of TiO <sub>2</sub> increased significantly the serum bilirubin in a dose dependent manner.<br>No modifications were found for ALP, ALT, ASR and TBA, suggesting that bilirubin could be used as an early toxicity biomarker of nanomaterials.                                                                                                                                                                                   |
| Abbasi-Oshaghi et al. (2019) [72] | Wistar rats (male, 8 weeks old)   | Blood (Serum) | ALP, ALT, AST, LDH, TBIL       | Exposure to TiO <sub>2</sub> NP significantly increased the ALP, ALT, AST and LDH serum levels, indicating liver damage.                                                                                                                                                                                                                                                                                                                                   |
| Moradi et al. (2019) [143]        | Wistar rats (male, 6–8 weeks old) | Blood (Serum) | ALP, ALT, AST, LDH             | Exposure to TiO <sub>2</sub> NP increased significantly the ALT, AST, ALP, and LDH serum levels, indicating liver damage.<br>A protective effect was demonstrated for vitamin A and E by its membrane stabilizing and antioxidant activity. The combination of both vitamins had a significantly greater effect on prevention of liver enzyme leakage than vitamin A which could demonstrate the better efficiency of vitamin E to scavenge free radicals. |

#### Cardiac damage

|                          |                                   |               |                     |                                                                                                                                                                                                                                                                   |
|--------------------------|-----------------------------------|---------------|---------------------|-------------------------------------------------------------------------------------------------------------------------------------------------------------------------------------------------------------------------------------------------------------------|
| Wang et al. (2007) [184] | CD-1 (ICR) mice                   | Blood (Serum) | CK, alpha-HBDH, LDH | Nanosized particles induced more severe myocardial damage than fine particles. For the TiO <sub>2</sub> 80 nm group (female mice), LDH and HBDH were higher than the control group and fine group (p<0.05).                                                       |
| Chen et al. (2015) [185] | Sprague-Dawley rats (3 weeks old) | Blood (Serum) | CK, HBDH, LDH       | Exposure to TiO <sub>2</sub> NPs (10 and 50 mg/kg bw/day) significantly decreases CK in females and LDH and HBDH in males during the 90 days exposure. The co-exposure to glucose caused the same effects at 30 and 90 days of exposure. Possible cardiac damage. |
| Bu et al. (2010) [40]    | Wistar rats                       | Blood (Serum) | CK, LDH             | The exposure to 0.4 and 1 g/Kg bw/day of TiO <sub>2</sub> significantly increase CK and LDH serum levels. Data suggest that cardiac damage may occur after repeated oral                                                                                          |

|  |  |  |  |                             |
|--|--|--|--|-----------------------------|
|  |  |  |  | administration of TiO2 NPs. |
|--|--|--|--|-----------------------------|

### Nephrotoxicity

|                                             |                                          |                  |               |                                                                                                                                                                                                                                                                                                                                    |
|---------------------------------------------|------------------------------------------|------------------|---------------|------------------------------------------------------------------------------------------------------------------------------------------------------------------------------------------------------------------------------------------------------------------------------------------------------------------------------------|
| Wang et al.<br>(2007) [184]                 | CD-1 (ICR)<br>mice                       | Blood<br>(Serum) | BUN, CREA, UA | Exposure to 5 g/kg bw of TiO2 particles, and due to the small size and difficult clearance of TiO2, the retention of different sized TiO2 particles in vivo induced the damage of kidneys.<br>For the TiO2 25 nm group (female mice), BUN was significantly increased when compared to the control group and fine particles group. |
| Chen et al.<br>(2015) [185]                 | Sprague-<br>Dawley rats<br>(3 weeks old) | Blood<br>(Serum) | BUN, CREA     | Exposure to TiO2 NPs (10 and 50 mg/kg bw/day) significantly increased BUN serum levels and decreased CREA serum levels in male rats. The co-exposure to glucose caused the same effects at 30 and 90 days of exposure.<br>Possible kidney damage.                                                                                  |
| Abbasi-<br>Oshaghi et<br>al. (2019)<br>[72] | Wistar rats<br>(male, 8 weeks<br>old)    | Blood<br>(Serum) | BUN, CREA     | Exposure to TiO2 NP (50 and 100 mg/kg) significantly increased the BUN and CREA serum levels, indicating kidney damage.                                                                                                                                                                                                            |

### Hematological effects

|                             |                                          |                           |                                                                                     |                                                                                                                                                                                                                                                                                              |
|-----------------------------|------------------------------------------|---------------------------|-------------------------------------------------------------------------------------|----------------------------------------------------------------------------------------------------------------------------------------------------------------------------------------------------------------------------------------------------------------------------------------------|
| Chen et al.<br>(2015) [185] | Sprague-<br>Dawley rats<br>(3 weeks old) | Blood<br>(Plasma<br>EDTA) | WBC, LYM,<br>MOD, GRN,<br>LYM%, MOD%,<br>GRN%, RBC,<br>HGB, HCT, MCV,<br>MCH, MCHC, | Exposure to TiO2 NPs significantly increases hematological parameters being attributed to the activation of immune function and inflammatory response (for parameters related with WBC) and to an adaptive body response to the toxic effects of TiO2 NPs (for parameters related with RBC). |
|-----------------------------|------------------------------------------|---------------------------|-------------------------------------------------------------------------------------|----------------------------------------------------------------------------------------------------------------------------------------------------------------------------------------------------------------------------------------------------------------------------------------------|

|                       |             |                        |                                   |                                                                                                                                                                                                                      |
|-----------------------|-------------|------------------------|-----------------------------------|----------------------------------------------------------------------------------------------------------------------------------------------------------------------------------------------------------------------|
|                       |             |                        | RDW, PLT, PCT, MPV, PDW           |                                                                                                                                                                                                                      |
|                       |             | Blood (Plasma Citrate) | APTT, FIB, PT                     | No significant alterations in coagulation parameters.                                                                                                                                                                |
| Bu et al. (2010) [40] | Wistar rats | Blood (Plasma EDTA)    | WBC, NEU, LYM, MON, RBC, HGB, PLT | The exposure to 1 g/Kg bw/day of TiO <sub>2</sub> significantly increases WBC, LYM and MON cell counts.<br>Data suggest that inflammation may be induced after repeated oral administration of TiO <sub>2</sub> NPs. |

#### Lipid metabolism

|                         |                                   |               |                        |                                                                                                                                                                                                                                                    |
|-------------------------|-----------------------------------|---------------|------------------------|----------------------------------------------------------------------------------------------------------------------------------------------------------------------------------------------------------------------------------------------------|
| Chen et al (2020) [188] | Sprague-Dawley rats (3 weeks old) | Blood (Serum) | LDL-C, HDL-C, TCHO, TG | Exposure to TiO <sub>2</sub> NPs (50 mg/kg) could have an impact on lipid metabolism in rats.<br>The level of TG significantly decreased.<br>The lipidomic signature changed significantly in the serum of rats treated with TiO <sub>2</sub> NPs. |
|-------------------------|-----------------------------------|---------------|------------------------|----------------------------------------------------------------------------------------------------------------------------------------------------------------------------------------------------------------------------------------------------|

#### Glucose metabolism

|                         |                                   |               |                                   |                                                                                                                                                                                                                                                                                                                                                 |
|-------------------------|-----------------------------------|---------------|-----------------------------------|-------------------------------------------------------------------------------------------------------------------------------------------------------------------------------------------------------------------------------------------------------------------------------------------------------------------------------------------------|
| Chen et al (2018) [189] | Sprague-Dawley rats (3 weeks old) | Blood (Serum) | GLU, HbA1c, GSP, INS, C-PEP, GLUC | Results of GLU, GSP and HbA1c over time showed that oral exposure to TiO <sub>2</sub> NPs could cause a slight and temporary hypoglycemic effect on rats, which appeared within subacute oral exposure, but disappeared when oral exposure was subchronic.<br>Secretion of insulin and glucagon were unaffected. The low level of blood insulin |
|-------------------------|-----------------------------------|---------------|-----------------------------------|-------------------------------------------------------------------------------------------------------------------------------------------------------------------------------------------------------------------------------------------------------------------------------------------------------------------------------------------------|

|  |  |                           |     |                                                                                                                                                                                                                              |
|--|--|---------------------------|-----|------------------------------------------------------------------------------------------------------------------------------------------------------------------------------------------------------------------------------|
|  |  |                           |     | was most likely due to the increased insulin metabolism in the liver to compensate for the hypoglycemic effect caused by subacute exposure of TiO <sub>2</sub> NPs and to promote the recovery of blood glucose homeostasis. |
|  |  | Blood (total blood, tail) | GLU | Exposure to 10 mg/kg bw/day TiO <sub>2</sub> NP during 30 days showed an increased postprandial blood glucose concentration, thus indicating that TiO <sub>2</sub> NPs could cause reduced glucose tolerance.                |

#### Prostatic and testicular toxicity

|                           |                    |                     |                            |                                                                                                                                                                                                                                                                                                                                                                                                                                                                                                                                                                                                                                                                                                                                                                                                                                          |
|---------------------------|--------------------|---------------------|----------------------------|------------------------------------------------------------------------------------------------------------------------------------------------------------------------------------------------------------------------------------------------------------------------------------------------------------------------------------------------------------------------------------------------------------------------------------------------------------------------------------------------------------------------------------------------------------------------------------------------------------------------------------------------------------------------------------------------------------------------------------------------------------------------------------------------------------------------------------------|
| Shahin et al (2017) [114] | Wistar rats (male) | Blood (Serum)       | E2, FSH, LH, PAP, PSA, TST | Exposure to TiO <sub>2</sub> NP for 2 and 3 weeks showed a significant increase in PSA and PAP serum levels. This effect on PSA serum levels was significantly attenuated by morin co-treatment. Morin co-treatment showed no effect on increased PAP serum levels.                                                                                                                                                                                                                                                                                                                                                                                                                                                                                                                                                                      |
|                           |                    | Testis and Prostate | ACP, GGT                   | Exposure to TiO <sub>2</sub> NP for 1, 2 and 3 weeks showed a significant decrease in TST serum levels that were only significantly attenuated by morin co-treatment in week 1.<br>Exposure to TiO <sub>2</sub> NP for 2 and 3 weeks showed a significant increase in E2, LH and FSH serum levels and ACP testicular activity, which were significantly attenuated by morin co-treatment.<br>Exposure to TiO <sub>2</sub> NP for 1, 2 and 3 weeks showed a significant increase in GGT testicular levels that were significantly attenuated by morin co-treatment.<br>Significant ameliorative potential of morin against nTiO <sub>2</sub> -induced prostatic and testicular toxicity was determined, with such beneficial roles of morin probably being mediated by redox regulatory, anti-inflammatory and anti-apoptotic mechanisms. |

Table S6 Footnote: Activated partial thromboplastin time (APTT), alanine aminotransferase (ALT), albumin (ALB), alkaline phosphatase (ALP), alpha-hydroxybutyrate dehydrogenase (HBDH), aspartate aminotransferase (AST), C-peptide (C-PEP), creatine kinase (CK), creatinine (CREA), estradiol (E2), fibrinogen (FIB), free testosterone (TST), follicle stimulating hormone (FSH), gama-glutamyl-transferase (GGT), glucose (GLU), glycated hemoglobin (HbA1c), glycated serum protein (GSP), globulin (GLB), glucagon levels (GLUC), granulocytes (GRN), hemoglobin concentration (HGB), hematocrit (HCT), high density lipoprotein cholesterol (HDL-C), indirect bilirubin (IBIL), insulin (INS), lactate dehydrogenase (LDH), low density lipoprotein cholesterol (LDL-C), luteinizing hormone (LH), lymphocytes (LYM), monocytes (MOD), percentage of lymphocytes (LYM%), percentage of monocytes (MOD%) and percentage of granulocytes (GRN%), red blood cells count (RBC), mean corpuscular volume (MCV), mean corpuscular hemoglobin (MCH), mean corpuscular hemoglobin concentration (MCHC), mean platelet volume (MPV), platelet count (PLT), platelet hematocrit (PCT), platelet distribution width (PDW), prostatic acid phosphatase (PAP), prostate specific antigen (PSA), prothrombin time (PT), red blood cell volume distribution width (RDW), total bilirubin (TBIL), total bile acid (TBA), total cholesterol (TCHO), triglycerides (TG), urea (BUN), uric acid (UA), white blood cells count (WBC)
